# Supplementary material for: A vinylogous Michael reaction of 2-furanone dimers with α,β-unsaturated nitroolefins for constructing chiral γ,γ-disubstituted butenolides
Source: Royal Society of Chemistry journal article supplement (doi:10.1039/d0qo00376j), 2020-01-01
Supplement: d0qo00376j1.pdf [file d0qo00376j1.pdf]

# A vinylogous Michael reaction of 2-Furanones Dimers to $\alpha$ , $\beta$ -unsaturated nitroolefins for constructing chiral $\gamma,\gamma$ -disubstituted butenolides†

Zhushuang Bai, <sup>\*a, b</sup> Cairong Zhang, <sup>b</sup> Yongyi Chen, <sup>b</sup> Aiqin Liu, <sup>b</sup> Xinyu Wang, <sup>b</sup> Chuna Yan, <sup>b</sup> Xuechao Liu, <sup>b</sup> Xiaoru Zhang, <sup>b</sup> Ying Li, <sup>b</sup> Ye Yuan, <sup>b</sup> Zemei Ge, <sup>a</sup> Jingxiang Pang, <sup>\*c</sup> Yongshuai Chai, <sup>\*d</sup> Xin Wang <sup>\*a</sup> and Runtao Li <sup>\*a</sup>

*a. State key Laboratory of Natural and Biomimetic Drugs, School of Pharmaceutical Sciences, Peking University, Beijing 100191, China. E-mail: xinwang@bjmu.edu.cn, lirt@bjmu.edu.cn.*

*b. Institute of Materia Medica, Shandong First Medical University & Shandong Academy of Medical Sciences, Jinan 250062, China. E-mail: baizhushuang@163.com.*

*c. Shandong Medicinal Biotechnology Center, Key Laboratory for Rare & Uncommon Diseases of Shandong Province, Key Laboratory for Biotech-Drugs of National Health Commission, Shandong First Medical University & Shandong Academy of Medical Sciences, Jinan, China .*

*d. Interdisciplinary Research Center on Biology and Chemistry, Shanghai Institute of Organic Chemistry, Chinese Academy of Sciences, Shanghai, 200032, P. R. China*

## Content

|                                                                            |     |
|----------------------------------------------------------------------------|-----|
| 1. General methods .....                                                   | S2  |
| 1.1 Materials .....                                                        | S2  |
| 1.2 References .....                                                       | S5  |
| 2. Synthesis and characterization of compounds <b>3</b> and <b>4</b> ..... | S6  |
| 2.1 General procedure for the vinylogous Michael reaction .....            | S6  |
| 2.2 General procedure for synthetic transformation .....                   | S6  |
| 2.3 Scope of the vinylogous Michael reaction .....                         | S6  |
| 3. Single Crystal X-Ray Diffraction of <b>3ay</b> .....                    | S16 |
| 4. DFT calculations .....                                                  | S18 |
| 4.1 Computational Information .....                                        | S18 |
| 4.2 Calculated total energies and cartesian coordinates .....              | S20 |
| 4.3 References .....                                                       | S53 |
| 5. NMR Spectra for Product <b>3aa-3ba</b> and <b>4aa</b> .....             | S54 |
| 6. HPLC data for Product <b>3aa-3ba</b> .....                              | S87 |

## 1. General methods

<sup>1</sup>H NMR spectra and <sup>13</sup>C NMR spectra were recorded on a Bruker AVANCE III 400 (400MHz) or Bruker AVANCE III 600 (600MHz) spectrometer in needful D-reagents with tetramethylsilane (TMS) as an internal reference. Data for <sup>1</sup>H NMR were reported as follows: chemical shift (ppm), and multiplicity (s= singlet, d= doublet, t= triplet, dd= double of doublet, br= broad, m= multiplet), coupling constants (Hz) and integration; Data for <sup>13</sup>C NMR were reported as ppm. HPLC analyses were performed using a Lux 5u Cellulose-2 purchased, . HRMS of vinylogous Michael products were carried out Bruker Apex IV FTMS.

### 1.1 Materials

Unless otherwise stated, all reagents were purchased from commercial suppliers and were used, including catalysts **IV**, **V** and **VI**. Catalysts **I** [1], **II** [1], **III** [2] and **VII**[3] were prepared to literature procedures and all the spectral data matches with the desire compounds.  $\alpha$ ,  $\beta$ -Unsaturated nitroalkenes **2a-x**, were prepared accordingly to standard literature procedures[4]. Reactions were monitored by thin layer chromatography (TLC) on GF254 silica gel plates.

Dimeric 2-Furanones **1a-d** were prepared according to following procedures .

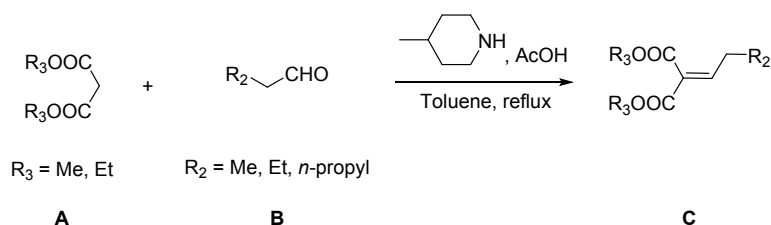

To the solution of diethylmalonate **A** (1.0 mol) in toluene (500mL) was added 4-methylpiperidine (0.156 mol) and acetic acid (20mL). While the mixture was heated to reflux with a water segregator, Aldehyde **B** (1.2 mol) was added in 12 batches within 2 hours. After extra 6 hours of reflux, the mixture was cooled down and then diluted with ethyl acetate (500mL) . The solution was washed with H<sub>2</sub>O(500mL), 10% (w/w) NaHCO<sub>3</sub> solution (500mL) and saturated NaCl solution (500mL) successively, dried over anhydrous Na<sub>2</sub>SO<sub>4</sub> and concentrated in vacuo. The residue was purified by silica gel chromatography (EA:PE=1:20) to afford **C** (yield 81.2%-92.5%) as colorless oil.

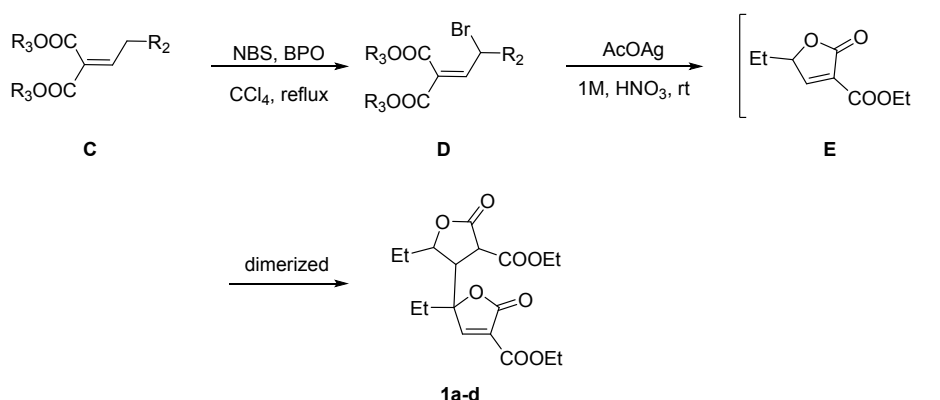

To the solution of **C** (100 mmol) obtained from previous steps in CCl<sub>4</sub> (100 mL) was added NBS (250 mmol) and benzoyl peroxide (2 mg). After 4 hours' reflux, the reaction mixture was cooled down and concentrated on a rotary evaporator. The residue was diluted with mL mixed solvent (petroleum ether:

ethyl acetate = 10:1, 200 mL) and the suspension was filtered. The filtrate was concentrated in vacuo to give crude product **D** which was used in the next step directly. Crude product **D** and AcOAg (100 mmol) were stirred in 1M dilute HNO<sub>3</sub> (200 mL) away from light under room temperature for 36 hours. The reaction mixture was diluted with ethyl acetate (250 mL) and the suspension was filtered. The solution was washed with H<sub>2</sub>O(250mL), 10% (w/w) NaHCO<sub>3</sub> solution (250mL) and saturated NaCl solution (250mL) successively, dried over anhydrous Na<sub>2</sub>SO<sub>4</sub> and concentrated in vacuo. The residue was purified by silica gel chromatography (EA:PE=1:4)to afford **1a-d** (39.1%-47.1% for 2 steps) as white solid or colorless oil.

**ethyl 5-(4-(ethoxycarbonyl)-2-ethyl-5-oxotetrahydrofuran-3-yl)-5-ethyl-2-oxo-2,5-dihydrofuran-3-carboxylate(1a):**

Obtained in 38% yield; Light yellow oil; purified by silica gel column chromatography(EA/Petroleum =

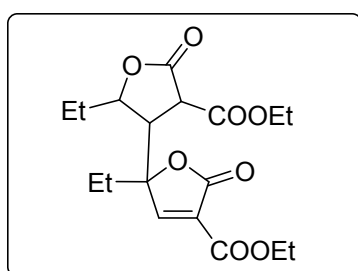

1:4); <sup>1</sup>H NMR (400 MHz, CDCl<sub>3</sub>) δ (ppm):δ 7.97 (s, 1H), 7.92 (s, 2H), 4.42 – 4.39 (m, 1H), 4.35 (ddd, *J* = 9.5, 7.3, 3.8 Hz, 7H), 4.26 (dd, *J* = 13.9, 6.8 Hz, 6H), 4.00 (td, *J* = 7.4, 4.3 Hz, 1H), 3.28 (d, *J* = 9.2 Hz, 2H), 3.20 (ddd, *J* = 13.3, 8.8, 7.2 Hz, 3H), 2.04 – 1.81 (m, 4H), 1.82 – 1.60 (m, 4H), 1.37 (ddd, *J* = 9.6, 7.1, 4.7 Hz, 6H), 1.29 (dd, *J* = 15.3, 8.2 Hz, 6H), 1.05 (dt, *J* = 24.7, 7.3 Hz, 6H),

0.87 (dd, *J* = 14.2, 7.1 Hz, 6H). <sup>13</sup>C NMR (100 MHz, CDCl<sub>3</sub>) δ 169.32, 168.91, 167.45, 166.95, 165.84, 165.60, 162.30, 162.14, 159.29, 159.24, 127.66, 127.57, 86.97, 86.79, 80.74, 79.62, 62.98, 62.30, 62.20, 49.21, 49.17, 48.46, 48.28, 29.54, 28.92, 28.82, 28.51, 14.09, 14.03, 14.00, 9.73, 9.62, 7.70, 7.53. HRMS (ESI): *m/z* calcd for C<sub>18</sub>H<sub>24</sub>O<sub>8</sub> (M+H)<sup>+</sup>: 369.1471. found: 369.1523.

**ethyl 5-(4-(ethoxycarbonyl)-2-methyl-5-oxotetrahydrofuran-3-yl)-5-methyl-2-oxo-2,5-dihydrofuran-3-carboxylate(1b):**

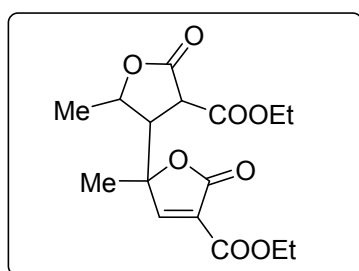

Obtained in 29% yield; Light yellow oil; purified by silica gel column chromatography(EA/Petroleum = 1:5); <sup>1</sup>H NMR (400 MHz, DMSO) δ (ppm):δ 8.59 (s, 1H), 8.57 (s, 1H), 4.63 – 4.39 (m, 2H), 4.28 – 4.22 (m, 4H), 4.16 (dd, *J* = 7.1, 1.0 Hz, 4H), 3.93 (d, *J* = 9.5 Hz, 1H), 3.86 (d, *J* = 9.5 Hz, 1H), 3.12 – 3.08 (m, 1H), 3.05 (d, *J* = 7.7 Hz, 1H), 1.49 (s, 2H), 1.48 (s, 2H), 1.41 (d, *J* = 6.2 Hz,

3H), 1.39 – 1.39 (m, 3H), 1.37 (d, *J* = 6.2 Hz, 3H), 1.30 – 1.24 (m, 6H), 1.21 (dd, *J* = 7.1, 3.3 Hz, 6H). <sup>13</sup>C NMR (100 MHz, DMSO) δ 170.5, 170.4, 168.2, 168.0, 166.1, 165.8, 165.7, 160.0, 159.9, 125.1, 125.0, 85.1, 85.0, 76.5, 75.8, 62.4, 61.6, 52.9, 52.2, 49.8, 49.4, 22.4, 22.0, 22.0, 21.5, 14.5, 14.4, 14.3, 14.2. HRMS (ESI): *m/z* calcd for C<sub>16</sub>H<sub>20</sub>O<sub>8</sub> (M+H)<sup>+</sup>:341.1158.found: 341.1202.

**ethyl 5-(4-(ethoxycarbonyl)-5-oxo-2-propyltetrahydrofuran-3-yl)-2-oxo-5-propyl-2,5-dihydrofuran-3-carboxylate(1c):**

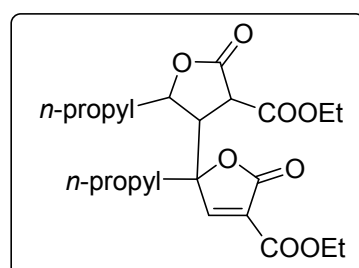

Obtained in 15% yield; Light yellow oil; purified by silica gel

column chromatography(EA/Petroleum = 1:5);  $^1\text{H NMR}$  (400 MHz,  $\text{CDCl}_3$ )  $\delta$  (ppm): $\delta$  7.99 (s, 1H), 7.92 (s, 1H), 4.49 – 4.41 (m, 1H), 4.40 – 4.32 (m, 4H), 4.26 (ddd,  $J = 13.1, 5.3, 3.8$  Hz, 4H), 4.09 – 3.92 (m, 1H), 3.77 (d,  $J = 8.8$  Hz, 1H), 3.27 (d,  $J = 9.2$  Hz, 1H), 3.22 – 3.17 (m, 1H), 3.16 – 3.08 (m, 1H), 1.91 – 1.69 (m, 6H), 1.67 – 1.44 (m, 6H), 1.42 – 1.33 (m, 8H), 1.32 – 1.13 (m, 8H), 0.98 (t,  $J = 7.5$  Hz, 6H), 0.94 – 0.87 (m, 6H).  $^{13}\text{C NMR}$  (100 MHz,  $\text{CDCl}_3$ )  $\delta$  169.3, 168.9, 167.5, 167.0, 165.8, 165.6, 162.6, 162.4, 159.3, 159.3, 127.2, 127.2, 86.7, 86.4, 79.3, 78.1, 63.0, 62.9, 62.3, 62.2, 50.0, 49.2, 49.0, 48.3, 38.8, 38.1, 37.7, 37.4, 18.8, 18.7, 16.9, 16.7, 14.1, 14.1, 14.0, 13.9, 13.9, 13.7, 13.5. HRMS (ESI):  $m/z$  calcd for  $\text{C}_{20}\text{H}_{28}\text{O}_8$  ( $\text{M}+\text{H}$ ) $^+$ : 397.1784. found: 397.1826.

**methyl 5-ethyl-5-(2-ethyl-4-(methoxycarbonyl)-5-oxotetrahydrofuran-3-yl)-2-oxo-2,5-dihydrofuran-3-carboxylate(1d):**

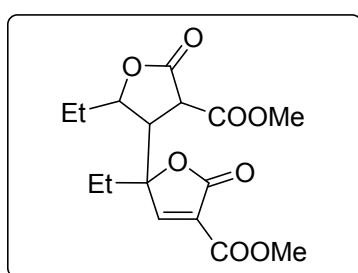

Obtained in 11% yield; Light yellow oil; purified by silica gel column chromatography(EA/Petroleum = 1:5);  $^1\text{H NMR}$  (400 MHz,  $\text{CDCl}_3$ )  $\delta$  (ppm):  $\delta$ 7.99 (s, 1H), 7.94 (s, 1H), 4.39 (td,  $J = 7.7, 3.4$  Hz, 1H), 3.92 (s, 1H), 3.91 (s, 3H), 3.87 (s, 3H), 3.80 (d,  $J = 7.1$  Hz, 3H), 3.78 (d,  $J = 8.5$  Hz, 3H), 3.30 (d,  $J = 8.9$  Hz, 1H), 3.20 (dd,  $J = 15.8, 7.6$  Hz, 1H), 2.07 – 1.94 (m, 1H), 1.88 (dt,  $J = 14.3, 6.4$  Hz, 2H), 1.81 – 1.69 (m, 1H), 1.66 (dd,  $J = 16.6, 9.4$  Hz, 2H), 1.08 (t,  $J = 7.3$  Hz, 4H), 1.02 (t,  $J = 7.3$  Hz, 4H), 0.87 (t,  $J = 7.4$  Hz, 6H), 0.86 – 0.81 (m, 6H).  $^{13}\text{C NMR}$  (100 MHz,  $\text{CDCl}_3$ )  $\delta$  168.7, 167.4, 162.6, 162.6, 159.7, 127.4, 87.1, 86.9, 80.8, 79.6, 53.8, 53.7, 53.0, 52.9, 49.1, 49.0, 48.4, 48.3, 29.6, 29.0, 28.9, 28.4, 9.7, 7.7, 7.5. HRMS (ESI):  $m/z$  calcd for  $\text{C}_{16}\text{H}_{20}\text{O}_8$  ( $\text{M}+\text{H}$ ) $^+$ : 341.1158. found: 341.1195.

**1.2 Reference:**

- [1] C. B. Tripathi, S. Kayal and S. Mukherjee, *Org. Lett.*, 2012, **14**, 3296.
- [2] F. Yu, Z. Jin, H. Huang, T. Ye, X. Liang and J. Ye, *Org. Biomol. Chem.*, 2010, **8**, 4767.
- [3] M. S. Manna, V. Kumar and S. Mukherjee, *Chem. Commun.*, 2012, **48**, 5193.
- [4] (a) D. M. Mampreian and A. H. Hoveyda, *Org. Lett.*, 2004, **6**, 2829.; (b) X. Xia, K. Shu, Y. Ji, A. Yang, X. Shaukat, Y. Liang, *J. Org. Chem.*, 2010, **75**, 2893.



## 2. Synthesis and characterization of 3 and 4

### 2.1 General procedure for the vinylogous Michael reaction

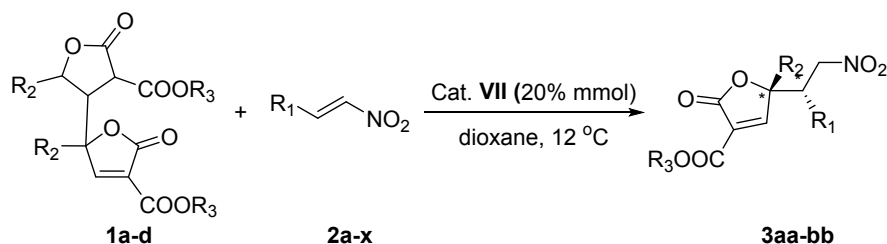

To a solution of nitroalkenes **2a-x** (0.5 mmol) and catalyst **VII** (10% mol) in dioxane (2 mL) was added  $\gamma$ -butenolide **1a-d** (0.25 mmol) at 12 °C. The resulting solution was stirred at 12 °C for 24h. After removal of solvent under reduced pressure, the crude material was purified by silica gel column chromatography(Ethyl acetate/Petroleum = 1:5).

### 2.2 General procedure for synthetic transformation

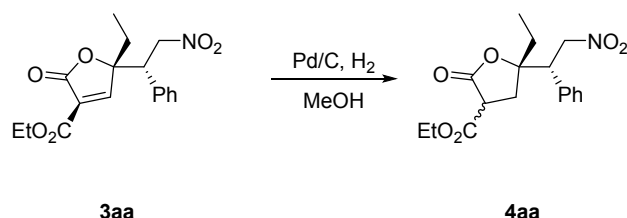

The vinylogous Michael addition product **3aa**, 167 mg (0.5 mmol), was dissolved in 5 ml of methanol, 20% of Pd/C by wt. was added, and the mixture was stirred for 5 h under hydrogen with bubbling. When the initial compound disappeared (TLC), the mixture was filtered, and the filtrate was evaporated. the crude material was purified by silica gel column chromatography(Ethyl acetate/Petroleum = 1:5).

### 2.3 Scope of the vinylogous Michael reaction

#### (S)-ethyl 5-ethyl-5-((S)-2-nitro-1-phenylethyl)-2-oxo-2,5-dihydrofuran-3-carboxylate (**3aa**):

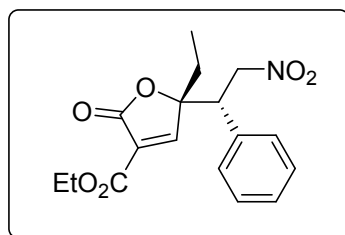

Obtained in 95% yield; Light yellow oil; purified by silica gel column chromatography(EA/Petroleum = 1:5); <sup>1</sup>H NMR (400 MHz, CDCl<sub>3</sub>)  $\delta$  7.88 (1 H, s),  $\delta$  7.39 – 7.28 (3 H, m),  $\delta$  7.20 – 7.15 (2 H, m),  $\delta$  4.85 (1 H, dd,  $J$  = 13.4, 5.0Hz),  $\delta$  4.76 (1 H, dd,  $J$  = 13.3, 10.0Hz),  $\delta$  4.27 (2 H, q,  $J$  = 7.1Hz),  $\delta$  4.11 (1 H, dd,  $J$  = 9.9, 5.0Hz),  $\delta$  2.02 (1 H, dq,  $J$  = 14.8, 7.4Hz),  $\delta$  1.85 (1 H, dq,  $J$  = 14.7, 7.4Hz),  $\delta$  1.31 (3 H, t,  $J$  = 7.1Hz),  $\delta$  0.88 (3 H, t,  $J$  = 7.4 Hz). <sup>13</sup>C NMR (100 MHz, CDCl<sub>3</sub>)  $\delta$  166.0, 162.9, 159.3, 133.7, 129.4, 129.0, 128.3, 127.0, 88.4, 75.2, 61.9, 49.6, 28.9, 14.0, 7.6. HPLC(Lux 5u Cellulose-2, hexane: i-PrOH = 80:20, 1.0mL/min,  $t_{R1}$ (major)=24.09 min,  $t_{R1}$ (minor)=44.04 min,  $t_{R2}$ (major)=49.90 min,  $t_{R2}$ (minor)=54.62min). dr=9.7:1. 92% ee. ES-HRMS: Calcd for C<sub>17</sub>H<sub>20</sub>NO<sub>6</sub> [M+H], 334.1285, Found 334.1292.

#### (S)-ethyl 5-ethyl-5-((S)-2-nitro-1-(p-tolyl)ethyl)-2-oxo-2,5-dihydrofuran-3-carboxylate (**3ab**):

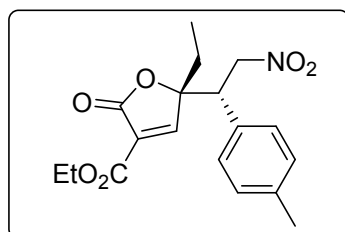

Obtained in 94% yield ; Light yellow oil; purified by silica gel column chromatography (EA/Petroleum = 1:5); <sup>1</sup>H NMR (400

MHz, CDCl<sub>3</sub>)  $\delta$  7.91 (1 H, s),  $\delta$  7.16 (2 H, d,  $J$ =7.9 Hz),  $\delta$  7.07 (2 H, d,  $J$ =8.0 Hz),  $\delta$  4.84 (1 H, dd,  $J$ =13.2, 5.0 Hz),  $\delta$  4.74 (1 H, dd,  $J$ =13.2, 10.1 Hz),  $\delta$  4.30 (2 H, q,  $J$ =7.1 Hz),  $\delta$  4.09 (1 H, dd,  $J$ =10.1, 5.0 Hz),  $\delta$  2.33 (3 H, s),  $\delta$  2.02 (1 H, td,  $J$ =14.5, 7.1 Hz),  $\delta$  1.85 (1 H, dq,  $J$ =14.8, 7.4 Hz),  $\delta$  1.33 (4 H, t,  $J$ =7.1 Hz),  $\delta$  0.89 (4 H, t,  $J$ =7.4 Hz). <sup>13</sup>C NMR (100 MHz, CDCl<sub>3</sub>)  $\delta$  166.0, 163.0, 159.4, 138.9, 130.5, 130.1, 128.2, 126.9, 88.6, 75.2, 61.9, 49.2, 28.9, 21.0, 14.0, 7.6. HPLC(Lux 5u Cellulose-2, hexane: i-PrOH =80:20, 1.0mL/min,  $t_{R1}$ (major)=27.961 min,  $t_{R1}$ (minor)=50.287 min,  $t_{R2}$ (major)=52.843 min,  $t_{R2}$ (minor)=65.880min ). dr=7.2:1. 92% ee. ES-HRMS: Calcd for C<sub>18</sub>H<sub>22</sub>NO<sub>6</sub> [M+H], 348.1442, Found 348.1448.

**(S)-ethyl-5-ethyl-5-((S)-1-(4-methoxyphenyl)-2-nitroethyl)-2-oxo-2,5-dihydrofuran-3-carboxylate (3ac):**

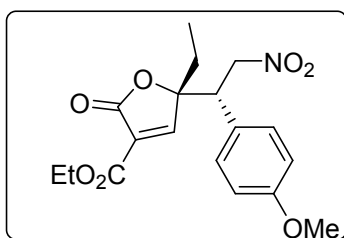

Obtained in 92% yield; Light yellow oil; purified by silica gel column chromatography (EA/Petroleum = 1:5); <sup>1</sup>H NMR (400 MHz, CDCl<sub>3</sub>)  $\delta$  7.92 (1 H, s),  $\delta$  7.11 (2 H, d,  $J$ =8.6 Hz),  $\delta$  6.88 (2 H, d,  $J$ =8.6 Hz),  $\delta$  4.84 (1 H, dd,  $J$ =13.1, 4.9 Hz),  $\delta$  4.73 (1 H, dd,  $J$ =13.1, 10.3 Hz),  $\delta$  4.30 (2 H, dd,  $J$ =13.7, 6.7 Hz),  $\delta$  4.08 (1 H, dd,  $J$ =10.5, 5.1 Hz),  $\delta$  2.02 (1H, td,  $J$ =14.6, 7.2 Hz),  $\delta$  1.87 (1 H, td,  $J$ =14.8, 7.4 Hz),  $\delta$  1.34 (3H, t,  $J$ =7.1 Hz),  $\delta$  0.90 (3 H, t,  $J$ =7.4 Hz). <sup>13</sup>C NMR (100 MHz, CDCl<sub>3</sub>)  $\delta$  166.1, 163.23, 159.9, 132.3, 129.4, 125.4, 114.8, 113.8, 88.7, 75.4, 62.0, 55.3, 48.8, 28.8, 14.0, 7.7. HPLC(Lux 5u Cellulose-2, hexane: i-PrOH =80:20, 1.0mL/min,  $t_R$ (major)=78.736 min,  $t_{R2}$ (minor)=94.351 min ). dr=12.5:1. 91% ee. ES-HRMS: Calcd for C<sub>18</sub>H<sub>22</sub>NO<sub>7</sub> [M+H], 364.1391, Found 364.1397.

**ethyl (S)-5-((S)-1-(4-(dimethylamino)phenyl)-2-nitroethyl)-5-ethyl-2-oxo-2,5-dihydrofuran-3-carboxylate (3ad):**

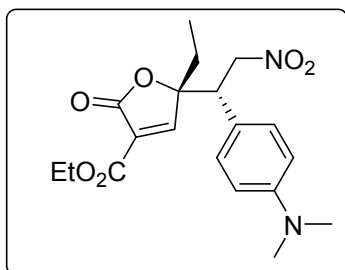

Obtained in 89% yield; Light yellow oil; purified by silica gel column chromatography (EA/Petroleum = 1:5); <sup>1</sup>H NMR (400 MHz, CDCl<sub>3</sub>)  $\delta$  7.94 (s, 1H), 7.01 (d,  $J$ =8.8 Hz, 2H), 6.64 (d,  $J$ =8.8 Hz, 2H), 4.77 (dd,  $J$ =13.0, 5.0 Hz, 1H), 4.66 (dd,  $J$ =12.8, 10.5 Hz, 1H), 4.30 (q,  $J$ =7.1 Hz, 2H), 4.02 (dd,  $J$ =10.3, 5.0 Hz, 1H), 2.93 (s, 6H), 2.02 – 1.93 (m, 1H), 1.87 – 1.77 (m, 1H), 1.33 (t,  $J$ =7.1 Hz, 3H), 0.86 (t,  $J$ =7.4 Hz, 3H). <sup>13</sup>C NMR (101 MHz, CDCl<sub>3</sub>)  $\delta$  165.2, 163.5, 162.6, 158.5, 149.5, 149.5, 128.9, 128.0, 125.7, 119.3, 119.1, 111.6, 111.4, 88.3, 88.2, 74.8, 74.4, 61.0, 60.9, 48.1, 47.9, 39.3, 39.2, 28.7, 27.9, 13.1, 13.1, 6.6, 6.4. HPLC(CHIRAL-OD-H, 259nm, hexane: i-PrOH =85:15, 2.0mL/min,  $t_{R1}$ (major) = 13.598 min,  $t_{R1}$ (minor) = 16.113 min,  $t_{R2}$ (minor) = 19.163 min,  $t_{R2}$ (major) = 25.232 min ). dr=9.1:1. 91 % ee. ES-HRMS: Calcd for C<sub>19</sub>H<sub>24</sub>N<sub>2</sub>NaO<sub>6</sub> [M+Na], 399.1532, Found 399.1508.

**ethyl (S)-5-((S)-1-(3,4-dimethoxyphenyl)-2-nitroethyl)-5-ethyl-2-oxo-2,5-dihydrofuran-3-carboxylate(3ae):**

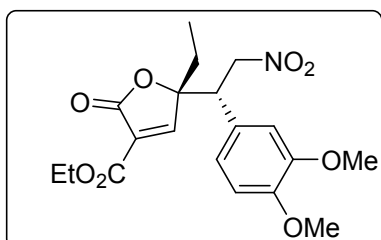

Obtained in 95% yield; Light yellow oil; purified by silica gel column chromatography (EA/Petroleum = 1:5); major diastereoisomer: <sup>1</sup>H NMR (400 MHz, CDCl<sub>3</sub>)  $\delta$  7.89 (s, 1H), 6.88 – 6.76 (m, 2H), 6.64 (d,  $J$ =2.1 Hz, 1H), 4.87 (dd,  $J$ =13.2,

4.9 Hz, 1H), 4.77 (dd,  $J = 13.2, 10.2$  Hz, 1H), 4.27 (q,  $J = 7.1$  Hz, 2H), 4.02 (dd,  $J = 10.3, 5.1$  Hz, 1H), 3.86 (s, 3H), 3.85 (s, 3H), 2.02 (dt,  $J = 14.9, 7.4$  Hz, 1H), 1.93 (dt,  $J = 14.4, 7.4$  Hz, 1H), 1.31 (t,  $J = 7.1$  Hz, 3H), 0.90 (t,  $J = 7.5$  Hz, 3H).  $^{13}\text{C NMR}$  (100 MHz,  $\text{CDCl}_3$ )  $\delta$  166.3, 163.5, 159.3, 149.5, 149.4, 126.6, 125.9, 120.7, 111.5, 111.0, 88.7, 75.5, 61.9, 56.1, 55.9, 49.0, 28.8, 14.0, 7.8. HPLC(CHIRAL-OJ-H, 210nm, hexane: i-PrOH =70:30, 2.0mL/min,  $t_{\text{R1}}$ (minor)=21.645 min,  $t_{\text{R1}}$ (major)=34.698 min). dr=8.3:1. 99% ee. ES-HRMS: Calcd for  $\text{C}_{19}\text{H}_{24}\text{NO}_8$  [M+H], 394.1502, Found 394.1484.

**ethyl (S)-5-ethyl-5-((S)-2-nitro-1-(3,4,5-trimethoxyphenyl)ethyl)-2-oxo-2,5-dihydrofuran-3-carboxylate(3af):**

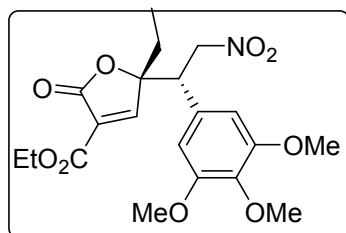

Obtained in 94% yield; Light yellow oil; purified by silica gel column chromatography (EA/Petroleum = 1:5); major diastereoisomer:  $^1\text{H NMR}$  (400 MHz,  $\text{CDCl}_3$ )  $\delta$  7.86 (s, 1H), 6.33 (s, 2H), 4.91 (dd,  $J = 13.4, 4.9$  Hz, 1H), 4.81 (dd,  $J = 13.4, 9.9$  Hz, 1H), 4.25 (q,  $J = 7.1$  Hz, 2H), 3.99 (dd,  $J = 9.9, 4.9$  Hz, 1H), 3.83 (s, 6H), 3.79 (s, 3H), 2.04 (dt,  $J = 14.5, 7.2$  Hz, 1H), 1.97 (dt,  $J = 14.4, 7.3$  Hz, 1H), 1.29 (t,  $J = 7.1$  Hz, 3H), 0.92 (t,  $J = 7.4$  Hz, 3H).  $^{13}\text{C NMR}$  (101 MHz,  $\text{CDCl}_3$ )  $\delta$  166.4, 163.2, 159.3, 153.8, 138.4, 129.3, 126.4, 105.2, 88.4, 75.4, 62.0, 60.9, 56.3, 49.4, 28.7, 14.0, 7.9. HPLC(CHIRAL-AD-H, 210nm, hexane: i-PrOH =90:10, 2.0mL/min,  $t_{\text{R1}}$ (minor)=12.764 min,  $t_{\text{R1}}$ (major)=315.663 min,  $t_{\text{R2}}$ (minor)=17.695 min,  $t_{\text{R2}}$ (minor)=18.697 min). dr=14.3:1. 97% ee. ES-HRMS: Calcd for  $\text{C}_{20}\text{H}_{26}\text{NO}_9$  [M+H], 424.1608, Found 424.1583.

**(S)-ethyl 5-((S)-1-(4-bromophenyl)-2-nitroethyl)-5-ethyl-2-oxo-2,5-dihydrofuran-3-carboxylate (3ag).**

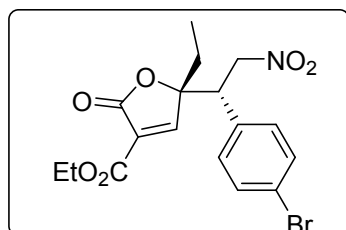

Obtained in 87% yield; Light yellow oil; purified by silica gel column chromatography (EA/Petroleum = 1:5);  $^1\text{H NMR}$  (400 MHz,  $\text{CDCl}_3$ )  $\delta$  7.87 (1 H, s),  $\delta$  7.50 (2 H, d,  $J = 7.8$  Hz),  $\delta$  7.08 (2 H, d,  $J = 7.6$  Hz),  $\delta$  4.92 – 4.84 (1 H, m),  $\delta$  4.76 (1 H, t,  $J = 11.9$  Hz),  $\delta$  4.30 (2 H, dd,  $J = 13.6, 6.6$  Hz),  $\delta$  4.13 – 4.05 (1 H, m),  $\delta$  1.33 (3 H, t,  $J = 7.1$  Hz),  $\delta$  0.91 (3 H, t,  $J = 7.1$  Hz).  $^{13}\text{C NMR}$  (100 MHz,  $\text{CDCl}_3$ )  $\delta$  165.8, 162.6, 159.2, 132.6, 129.9, 127.2, 123.3, 110.0, 88.0, 75.0, 62.1, 48.9, 28.8, 14.0, 7.7. HPLC(CHIRAL-OD-H, hexane: i-PrOH =65:35, 254nm, 1.0mL/min,  $t_{\text{R1}}$ (major)=13.769 min,  $t_{\text{R1}}$ (minor)=15.381 min,  $t_{\text{R2}}$ (major)=22.234 min,  $t_{\text{R2}}$ (minor)=33.377min). dr=8.7:1. 92% ee. ES-HRMS: Calcd for  $\text{C}_{17}\text{H}_{19}\text{BrNO}_6$  [M+H], 412.0390, Found 412.0400.

**(S)-ethyl-5-((S)-1-(4-chlorophenyl)-2-nitroethyl)-5-ethyl-2-oxo-2,5-dihydrofuran-3-carboxylate (3ah)**

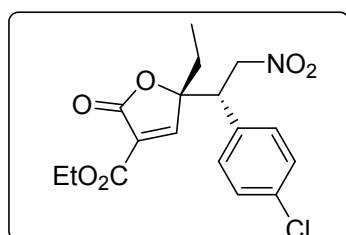

Obtained in 90% yield; Light yellow oil; purified by silica gel column chromatography(EA/Petroleum = 1:5) ;  $^1\text{H NMR}$  (400 MHz,  $\text{CDCl}_3$ )  $\delta$  7.88 (1 H, s), 7.37 – 7.32 (2 H, d,  $J = 8.5$ ), 7.15 (2 H, d,  $J = 8.5$  Hz), 4.89 (1 H, dd,  $J = 13.5\text{Hz}, 4.9\text{Hz}$ ), 4.77 (1 H, dd,  $J = 13.4$  Hz, 10.3 Hz), 4.30 (2 H, q,  $J = 7.1$  Hz), 4.10 (1H, dd,  $J = 10.3$  Hz, 4.8 Hz), 2.08 – 1.98 (1 H, m), 1.89 (1 H, m), 1.33 (3 H, t,  $J = 7.1$  Hz), 0.91 (3 H, t,  $J = 7.4$  Hz).  $^{13}\text{C NMR}$  (100 MHz,  $\text{CDCl}_3$ )  $\delta$  165.8,

162.7, 159.2, 135.1, 132.2, 129.7, 129.6, 127.2, 88.1, 75.1, 62.1, 48.8, 28.8, 14.0, 7.7. HPLC(CHIRAL-OD-H, hexane: i-PrOH =80:20, 1.0mL/min,  $t_{R1}$ (major) = 19.70 min,  $t_{R1}$ (minor) = 21.73 min,  $t_{R2}$ (major) = 45.15 min,  $t_{R2}$ (minor) = 33.50 min ). dr= 10.1:1. 88% ee. ES-HRMS: Calcd for  $C_{17}H_{19}ClNO_6$  [M+H], 368.0895, Found 368.0903.

**ethyl (S)-5-ethyl-5-((S)-1-(4-fluorophenyl)-2-nitroethyl)-2-oxo-2,5-dihydrofuran-3-carboxylate (3ai)**

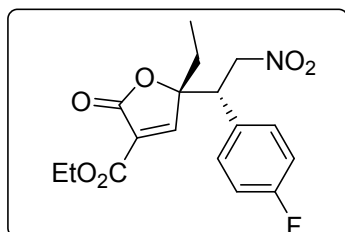

Obtained in 91% yield; Light yellow oil; purified by silica gel column chromatography(EA/Petroleum = 1:5) ;  $^1H$  NMR (400 MHz,  $CDCl_3$ )  $\delta$  7.86 (s, 1H), 7.20 – 7.13 (m, 2H), 7.05 (t,  $J$  = 8.5 Hz, 2H), 4.88 (dd,  $J$  = 13.4 Hz, 4.8 Hz, 1H), 4.76 (dd,  $J$  = 13.3 Hz, 10.3 Hz, 1H), 4.27 (q,  $J$  = 7.1 Hz, 2H), 4.09 (dd,  $J$  = 10.3Hz, 4.9 Hz, 1H), 2.02 (dq,  $J$  = 14.8 Hz, 7.4 Hz, 1H), 1.89 (dq,  $J$  = 14.7 Hz, 7.4 Hz, 1H), 1.31 (t,  $J$  = 7.1 Hz, 3H), 0.90 (t,  $J$  = 7.4 Hz, 3H);  $^{13}C$  NMR (101 MHz,  $CDCl_3$ )  $\delta$  165.9, 163.4(d,  $J$  = 122 Hz), 159.21, 130.1(d,  $J$  = 9 Hz), 127.1, 116.5(d,  $J$  = 21 Hz) , 88.3, 75.2, 62.1, 48.7, 28.8, 14.0, 7.7. HPLC(Lux 5u Cellulose-2, hexane: i-PrOH =80:20, 1.0mL/min,  $t_{R1}$ (major)=24.87 min,  $t_{R1}$ (minor)=41.67 min,  $t_{R2}$ (major)=43.68 min,  $t_{R2}$ (minor)=51.10 min ). dr=19.2:1. 90%ee. ES-HRMS: Calcd for  $C_{17}H_{19}FNO_6$  [M+H], 352.1191, Found 352.1197.

**ethyl (S)-5-ethyl-5-((S)-2-nitro-1-(4-nitrophenyl)ethyl)-2-oxo-2,5-dihydrofuran-3-carboxylate (3aj):**

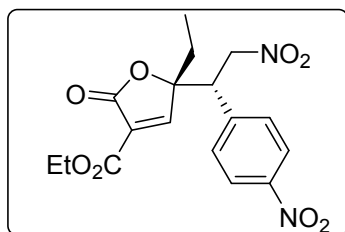

Obtained in 89% yield; Light yellow oil; purified by silica gel column chromatography (EA/Petroleum = 1:5);  $^1H$  NMR (600 MHz,  $CDCl_3$ )  $\delta$  8.20 (d,  $J$  = 8.6 Hz, 1H), 7.86 (s, 1H), 7.39 (d,  $J$  = 8.7 Hz, 2H), 4.96 (dd,  $J$  = 13.8, 4.6 Hz, 1H), 4.85 (dd,  $J$  = 13.8, 10.4 Hz, 1H), 4.23 (q,  $J$  = 7.3 Hz, 1H), 4.20 (dd,  $J$  = 10.6, 4.8 Hz, 1H), 2.04 (td,  $J$  = 14.9, 7.5 Hz, 1H), 1.96 – 1.89 (m, 1H), 1.27 (t,  $J$  = 6.7 Hz, 3H), 0.91 (t,  $J$  = 7.4 Hz, 3H).  $^{13}C$  NMR (101 MHz,  $CDCl_3$ )  $\delta$  165.4, 162.6, 162.0, 140.9, 130.5, 129.4, 124.6, 124.4, 87.6, 74.8, 62.2, 49.0, 28.9, 14.0, 7.8. HPLC(CHIRAL-OD-H, hexane: i-PrOH =90:10, 1.0mL/min,  $t_{R1}$ (minor)=21.38 min,  $t_{R1}$ (major)=44.08 min). dr=5.0:1. 94% ee. ES-HRMS: Calcd for  $C_{17}H_{19}N_2O_8$  [M+H], 379.1141, Found 379.1128.

**ethyl (S)-5-((S)-1-(4-cyanophenyl)-2-nitroethyl)-5-ethyl-2-oxo-2,5-dihydrofuran-3-carboxylate (3ak):**

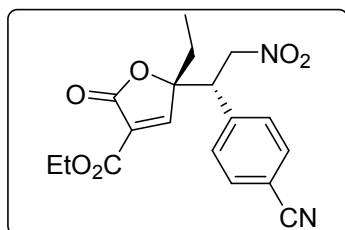

Obtained in 81% yield; Light yellow oil; purified by silica gel column chromatography (EA/Petroleum = 1:5);  $^1H$  NMR (600 MHz,  $CDCl_3$ )  $\delta$  7.83 (s, 1H), 7.66 (d,  $J$  = 8.4 Hz, 2H), 7.34 (d,  $J$  = 8.3 Hz, 2H), 4.94 (dd,  $J$  = 13.8, 4.6 Hz, 1H), 4.84 (dd,  $J$  = 13.7, 10.4 Hz, 1H), 4.27 (q,  $J$  = 7.1 Hz, 2H), 4.15 (dd,  $J$  = 10.4, 4.7 Hz, 1H), 2.04 (m, 1H), 1.93 (dq,  $J$  = 14.8, 7.4 Hz, 1H), 1.31 (t,  $J$  = 7.2 Hz, 3H), 0.92 (t,  $J$  = 7.4 Hz, 3H).  $^{13}C$  NMR (150 MHz,  $CDCl_3$ )  $\delta$  165.5, 162.1, 158.8, 139.1, 133.2, 133.0, 129.2, 127.5, 87.7, 75.3, 62.3, 49.3, 28.8, 14.1, 7.8. HPLC(CHIRAL-OD-H, hexane: i-PrOH =70:30,

2.0mL/min,  $t_{R1}(\text{major}) = 9.61$  min,  $t_{R1}(\text{minor}) = 10.76$  min,  $t_{R2}(\text{major}) = 13.02$  min,  $t_{R2}(\text{minor}) = 18.25$  min ). dr= 5.0:1. 84% ee. ES-HRMS: Calcd for  $C_{18}H_{18}N_2NaO_6$  [M+Na], 381.1063, Found 381.1043.

**ethyl (S)-5-ethyl-5-((S)-2-nitro-1-(4-(trifluoromethyl)phenyl)ethyl)-2-oxo-2,5-dihydrofuran-3-carboxylate (3al):**

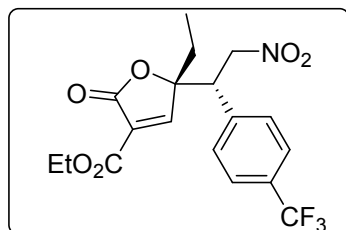

Obtained in 80% yield; Light yellow oil; purified by silica gel column chromatography (EA/Petroleum = 1:5);  $^1H$  NMR (600 MHz,  $CDCl_3$ )  $\delta$  7.83 (s, 1H),  $\delta$  7.61 (d,  $J = 8.1$  Hz, 2H), 7.32 (d,  $J = 8.1$  Hz, 2H), 4.91 (dd,  $J = 13.6, 4.7$  Hz, 1H), 4.81 (dd,  $J = 13.6, 10.3$  Hz, 1H), 4.27 – 4.22 (m, 2H), 4.16 (dd,  $J = 10.3, 4.7$  Hz, 1H), 2.03 (dq,  $J = 14.9, 7.5$  Hz, 1H), 1.88 (dq,  $J = 14.8, 7.4$  Hz, 1H), 1.28 (t,  $J = 7.2$  Hz, 3H), 0.90 (t,  $J = 7.5$  Hz, 3H).  $^{13}C$  NMR (150 MHz,  $CDCl_3$ )  $\delta$  165.7, 163.1, 162.4, 159.2, 138.1, 137.9, 127.4, 126.5, 124.5, 88.0, 74.9, 62.2, 49.3, 28.9, 14.0, 7.8. HPLC(CHIRAL-OD-H, hexane: i-PrOH =65:35, 1.0mL/min,  $t_{R1}(\text{major}) = 9.424$  min,  $t_{R1}(\text{minor}) = 11.056$  min,  $t_{R2}(\text{minor}) = 14.619$  min,  $t_{R2}(\text{major}) = 22.735$  min ). dr= 11.1:1. 89.0% ee. ES-HRMS: Calcd for  $C_{18}H_{19}F_3NO_6$  [M+H], 402.1164, Found 402.1140.

**ethyl (S)-5-ethyl-5-((S)-1-(4-(methoxycarbonyl)phenyl)-2-nitroethyl)-2-oxo-2,5-dihydrofuran-3-carboxylate (3am):**

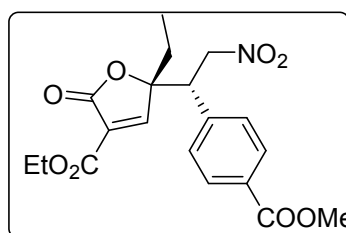

Obtained in 87% yield; Light yellow oil; purified by silica gel column chromatography (EA/Petroleum = 1:5);  $^1H$  NMR (400 MHz,  $CDCl_3$ )  $\delta$  8.02 (d,  $J = 8.3$  Hz, 2H), 7.87 (s, 1H), 7.28 (d,  $J = 9.4$  Hz, 2H), 4.94 – 4.87 (m, 1H), 4.81 (dd,  $J = 13.5, 10.1$  Hz, 1H), 4.26 (q,  $J = 7.2$  Hz, 2H), 4.17 (dd,  $J = 10.0, 4.9$  Hz, 1H), 3.92 (s, 3H), 2.08 – 1.98 (m, 1H), 1.94 – 1.83 (m, 1H), 1.30 (t,  $J = 7.1$  Hz, 3H), 0.90 (t,  $J = 7.5$  Hz, 3H).  $^{13}C$  NMR (101 MHz,  $CDCl_3$ )  $\delta$  166.2, 165.7, 162.5, 159.1, 138.7, 130.9, 130.6, 128.4, 127.2, 88.0, 74.9, 62.1, 52.4, 49.3, 29.0, 14.0, 7.7. HPLC(CHIRAL-OD-H, hexane: i-PrOH =65:35, 1.0mL/min,  $t_{R1}(\text{minor}) = 16.302$  min,  $t_{R1}(\text{major}) = 18.529$  min,  $t_{R2}(\text{minor}) = 24.237$  min,  $t_{R2}(\text{major}) = 32.231$  min ). dr= 7.0:1. 89% ee. ES-HRMS: Calcd for  $C_{19}H_{22}NO_8$  [M+H], 392.1345, Found 392.1320.

**(S)-ethyl-5-((S)-1-(2-chlorophenyl)-2-nitroethyl)-5-ethyl-2-oxo-2,5-dihydrofuran-3-carboxylate (3an).**

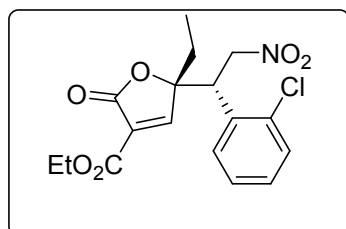

Obtained in 85% yield; Light yellow oil; purified by silica gel column chromatography (EA/Petroleum = 1:5);  $^1H$  NMR (400 MHz,  $CDCl_3$ )  $\delta$  8.03 (s, 1H), 7.44 – 7.33 (m, 2H), 7.27 – 7.23 (m, 2H), 5.05 – 4.88 (m, 2H), 4.47 – 4.31 (m, 1H), 4.28 – 4.18 (m, 2H), 2.12 – 2.05 (m, 2H), 1.28 (t,  $J = 7.1$  Hz, 3H), 0.98 (t,  $J = 7.4$  Hz, 3H).  $^{13}C$  NMR (100 MHz,  $CDCl_3$ )  $\delta$  166.1, 162.4, 159.1, 134.3, 131.7, 130.3, 130.1, 128.0, 127.8, 126.86, 88.55, 74.81, 61.82, 43.65, 28.49, 13.98, 8.01; HPLC(Lux 5u Cellulose-2, hexane: i-PrOH =80:20, 1.0mL/min,  $t_{R1}(\text{major})=23.73$  min,  $t_{R1}(\text{minor})=36.22$  min,  $t_{R2}(\text{major})=45.00$  min,  $t_{R2}(\text{minor})=66.87$  min ). dr=9.5:1. 90% ee. ES-HRMS: Calcd for  $C_{17}H_{19}ClNO_6$  [M+H], 368.0895, Found 368.0901.

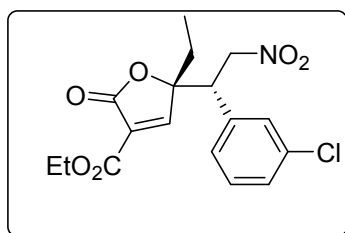

**(S)-ethyl-5-((S)-1-(3-chlorophenyl)-2-nitroethyl)-5-ethyl-2-oxo-2,5-dihydrofuran-3-carboxylate (3ao).**

Obtained in 85% yield; Light yellow oil; purified by silica gel column chromatography (EA/Petroleum = 1:5);  $^1\text{H NMR}$  (400 MHz,  $\text{CDCl}_3$ )  $\delta$  7.90 (1 H, s),  $\delta$  7.33 – 7.29 (2 H, m),  $\delta$  7.20 (1 H, s),  $\delta$  7.11 (1 H, dd,  $J=6.0$  Hz, 2.4 Hz),  $\delta$  4.88 (1 H, dd,  $J=13.6$  Hz, 4.8 Hz),  $\delta$  4.77 (1 H, dd,  $J=13.5$  Hz, 10.2 Hz),  $\delta$  4.29 (2 H, dd,  $J=14.3$  Hz, 7.1 Hz),  $\delta$  4.10 (1 H, dd,  $J=10.1$  Hz, 4.8 Hz),  $\delta$  2.03 (1 H, dq,  $J=14.8$  Hz, 7.4 Hz),  $\delta$  1.88 (1 H, dq,  $J=14.7$  Hz, 7.4 Hz),  $\delta$  1.33 (3 H, t,  $J=7.1$  Hz),  $\delta$  0.90 (3 H, t,  $J=7.4$  Hz).  $^{13}\text{C NMR}$  (100 MHz,  $\text{CDCl}_3$ )  $\delta$  165.8, 162.5, 159.2, 135.8, 135.3, 130.7, 129.3, 128.8, 127.1, 126.1, 88.1, 74.9, 62.0, 49.1, 28.8, 14.0, 7.6. HPLC(Lux 5u Cellulose-2, hexane: i-PrOH =80:20, 1.0mL/min,  $t_{\text{R1}}$ (major)=20.82 min,  $t_{\text{R1}}$ (minor)=44.57 min,  $t_{\text{R2}}$ (major)=47.94 min,  $t_{\text{R2}}$ (minor)=50.54min ). dr=12.3:1. 90% ee. ES-HRMS: Calcd for  $\text{C}_{17}\text{H}_{19}\text{ClNO}_6$  [M+H], 368.0895, Found 368.0903.

**(S)-ethyl-5-((S)-1-(2-bromophenyl)-2-nitroethyl)-5-ethyl-2-oxo-2,5-dihydrofuran-3-carboxylate (3ap).**

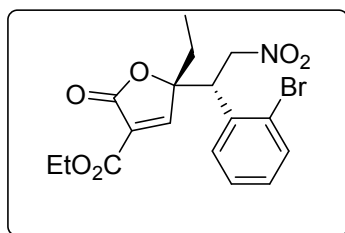

Obtained in 82% yield; Light yellow oil; purified by silica gel column chromatography (EA/Petroleum = 1:5);  $^1\text{H NMR}$  (400 MHz,  $\text{CDCl}_3$ )  $\delta$  8.10 (s, 1H), 7.61 – 7.53 (m, 1H), 7.32 (t,  $J=7.1$  Hz, 1H), 7.26 – 7.23 (m, 1H), 7.20 – 7.13 (m, 1H), 5.03 (dd,  $J=12.2$  Hz, 3.5 Hz, 1H), 4.97 – 4.87 (m, 1H), 4.33 (dd,  $J=8.7$  Hz, 4.7 Hz, 1H), 4.28 – 4.18 (m, 2H), 2.10 (q,  $J=7.4$  Hz, 2H), 1.38 – 1.17 (m, 3H), 1.03 – 0.95 (m, 3H).  $^{13}\text{C NMR}$  (100 MHz,  $\text{CDCl}_3$ )  $\delta$  165.0, 162.5, 159.1, 133.7, 133.4, 130.9, 130.4, 128.9, 128.6, 127.9, 88.5, 75.0, 61.8, 46.5, 28.6, 14.0, 8.1. HPLC(Lux 5u Cellulose-2, hexane: i-PrOH =80:20, 1.0mL/min,  $t_{\text{R1}}$ (major)=25.83 min,  $t_{\text{R1}}$ (minor)=39.60 min,  $t_{\text{R2}}$ (major)=50.48 min,  $t_{\text{R2}}$ (minor)=74.98 min ). dr=11.0:1. 91% ee. ES-HRMS: Calcd for  $\text{C}_{17}\text{H}_{19}\text{BrNO}_6$  [M+H], 412.0390, Found 412.0399.

**(S)-ethyl-5-ethyl-5-((S)-2-nitro-1-(3-nitrophenyl)ethyl)-2-oxo-2,5-dihydrofuran-3-carboxylate (3aq).**

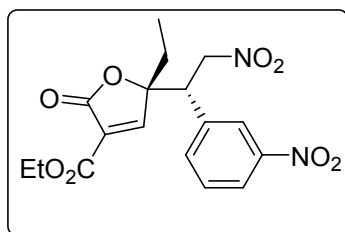

Obtained in 84% yield; Light yellow oil; purified by silica gel column chromatography (EA/Petroleum = 1:5);  $^1\text{H NMR}$  (400 MHz,  $\text{CDCl}_3$ )  $\delta$  8.22 (1 H, d,  $J=3.5$  Hz),  $\delta$  8.10 (1 H, s),  $\delta$  7.92 (1 H, s),  $\delta$  7.60 (2 H, d,  $J=5.1$  Hz),  $\delta$  5.00 (1 H, dd,  $J=13.7$ , 4.7 Hz),  $\delta$  4.90 (1 H, dd,  $J=13.5$ , 10.4 Hz),  $\delta$  4.26 (3 H, m),  $\delta$  2.08 (1 H, td,  $J=14.7$ , 7.4 Hz),  $\delta$  1.96 (1 H, td,  $J=14.6$ , 7.3 Hz),  $\delta$  1.30 (3 H, t,  $J=7.1$ ),  $\delta$  0.95 (3 H, t,  $J=7.4$  Hz).  $^{13}\text{C NMR}$  (100 MHz,  $\text{CDCl}_3$ )  $\delta$  165.5, 162.0, 158.9, 148.5, 136.0, 133.8, 130.6, 127.5, 124.1, 123.8, 87.7, 74.8, 62.2, 49.0, 28.7, 14.0, 7.7. HPLC(CHIRAL-OD-H, hexane: i-PrOH =80:20, 1.0mL/min,  $t_{\text{R1}}$ (minor)=49.457 min,  $t_{\text{R1}}$ (major)=55.166 min,  $t_{\text{R2}}$ (major)=61.024 min,  $t_{\text{R2}}$ (minor)=82.746 ). dr=5.0:1. 85% ee. ES-HRMS: Calcd for  $\text{C}_{17}\text{H}_{19}\text{N}_2\text{O}_8$

[M+H], 379.1136, Found 379.1144.

**(S)-ethyl-5-ethyl-5-((S)-1-(naphthalen-2-yl)-2-nitroethyl)-2-oxo-2,5-dihydrofuran-3-carboxylate (3ar).**

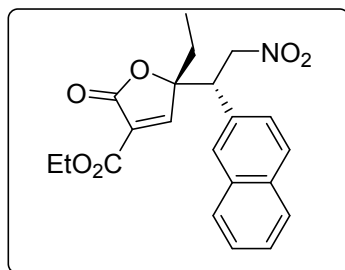

Obtained in 89% yield; Light yellow oil; purified by silica gel column chromatography (EA/Petroleum = 1:5);  $^1\text{H NMR}$  (400 MHz,  $\text{CDCl}_3$ )  $\delta$  7.98 (1 H, s),  $\delta$  7.89 – 7.82 (3 H, m),  $\delta$  7.77 – 7.72 (1 H, m),  $\delta$  7.68 (1H, s),  $\delta$  7.58 – 7.53 (2 H, m),  $\delta$  4.95 (1 H, dd,  $J$  =13.4, 5.4 Hz),  $\delta$  4.89 (1 H, dd,  $J$ =13.4, 9.8 Hz),  $\delta$  4.35 – 4.29 (1 H, m),  $\delta$  4.24 (2 H, q,  $J$ =7.2 Hz),  $\delta$  1.97 –  $\delta$  1.84 (1 H, m),  $\delta$  1.73 (1 H, dd,  $J$  =14.8, 6.9 Hz),  $\delta$  1.29 – 1.23 (3 H, m),  $\delta$  0.92 (3 H, t,  $J$  =7.4 Hz).  $^{13}\text{C NMR}$  (100 MHz,  $\text{CDCl}_3$ )  $\delta$  166.0, 162.8, 159.3, 133.2, 133.2, 131.0, 130.9, 129.5, 128.9, 128.1, 128.0, 127.7, 127.0, 126.9, 88.6, 75.3, 61.9, 49.8, 29.1, 13.9, 7.6. HPLC(CHIRAL-OD-H, hexane: i-PrOH =70:30, 2.0mL/min,  $t_{R1}$ (minor)=53.03 min,  $t_{R1}$ (major)=94.60 min,  $t_{R2}$ (major)=103.56 min,  $t_{R2}$ (minor)=134.02 min ). dr=11.8:1. 94% ee. ES-HRMS: Calcd for  $\text{C}_{21}\text{H}_{22}\text{NO}_6$  [M+H], 384.1442, Found 384.1448.

**ethyl (S)-5-ethyl-5-((S)-1-(furan-2-yl)-2-nitroethyl)-2-oxo-2,5-dihydrofuran-3-carboxylate (3as).**

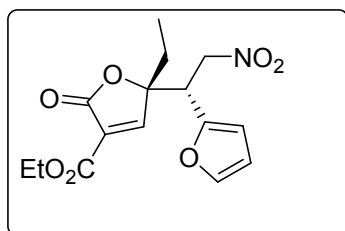

Obtained in 82% yield; Light yellow oil; purified by silica gel column chromatography (EA/Petroleum = 1:5);  $^1\text{H NMR}$  (400 MHz,  $\text{CDCl}_3$ )  $\delta$  8.14 (s, 1H), 7.44 (s, 1H), 6.37 (s, 2H), 4.60 (d,  $J$  = 7.5 Hz, 2H), 4.37 (q,  $J$  = 7.3 Hz, 2H), 4.30 (t,  $J$  = 7.5 Hz, 1H), 1.95 (dt,  $J$  = 22.4, 7.6 Hz, 1H), 1.74 (td,  $J$  = 14.6, 7.3 Hz, 1H), 1.39 (t,  $J$  = 7.1 Hz, 3H), 0.91 (t,  $J$  = 7.4 Hz, 3H).  $^{13}\text{C NMR}$  (100 MHz,  $\text{CDCl}_3$ )  $\delta$  165.8, 162.9, 159.4, 147.1, 143.5, 126.9, 111.0, 110.9, 87.6, 73.5, 62.1, 43.3, 29.1, 14.1, 7.4. HPLC(CHIRAL-OJ-H, 210 nm, hexane: i-PrOH =70:30, 1.0mL/min,  $t_{R1}$ (major) = 34.875 min,  $t_{R1}$ (minor) = 44.793 min,  $t_{R2}$ (major) = 60.858 min,  $t_{R2}$ (minor) = 73.100 min ). dr=16.5:1 . 91% ee. ES-HRMS: Calcd for  $\text{C}_{15}\text{H}_{18}\text{NO}_7$  [M+H], 324.1083, Found 324.1066.

**(S)-ethyl-5-ethyl-5-((S)-2-nitro-1-(thiophen-2-yl)ethyl)-2-oxo-2,5-dihydrofuran-3-carboxylate (3at).**

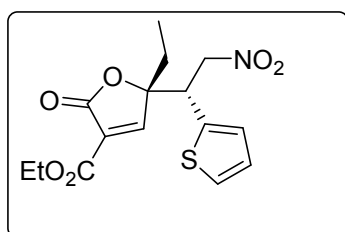

Obtained in 90% yield; Light yellow oil; purified by silica gel column chromatography (EA/Petroleum = 1:5);  $^1\text{H NMR}$  (400 MHz,  $\text{CDCl}_3$ )  $\delta$  8.01 (1 H, s),  $\delta$  7.28 (1 H, s),  $\delta$  6.98 (2 H, s),  $\delta$  4.84 (1 H, dd,  $J$  =13.2, 4.4 Hz),  $\delta$  4.67 (1 H, dd,  $J$  =15.0, 8.6 Hz),  $\delta$  4.46 (1 H, dd,  $J$  =10.1, 4.3 Hz),  $\delta$  4.32 (2 H, q,  $J$  =7.0),  $\delta$  2.04 (1 H, td,  $J$  =14.7, 7.4 Hz),  $\delta$  1.91 (1 H, td,  $J$  =14.9, 7.6 Hz),  $\delta$  1.35 (3 H, t,  $J$  =7.1 Hz),  $\delta$  0.94 (3 H, t,  $J$  =7.4 Hz).  $^{13}\text{C NMR}$  (100 MHz,  $\text{CDCl}_3$ )  $\delta$  165.9, 162.4, 159.3, 135.4, 127.8, 127.6, 127.1, 126.4, 88.1, 76.3, 62.0, 44.7, 28.8, 14.0, 7.7. HPLC(Lux 5u Cellulose-2, hexane: i-PrOH =80:20, 1.0mL/min,  $t_{R1}$ (major)=26.86 min,  $t_{R1}$ (minor)=49.29 min,  $t_{R2}$ (major)=52.97 min,  $t_{R2}$ (minor)=68.43min). dr=8.9:1. 90% ee. ES-HRMS: Calcd for  $\text{C}_{15}\text{H}_{18}\text{NO}_6\text{S}$  [M+H], 340.0849, Found 340.0855.

**ethyl (S)-5-ethyl-5-((S)-1-(1-methyl-1H-indol-2-yl)-2-nitroethyl)-2-oxo-2,5-dihydrofuran-3-carboxylate (3au).**

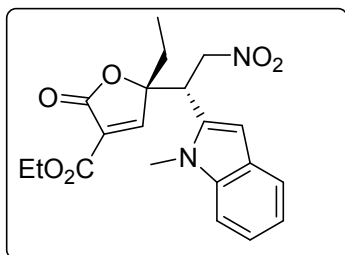

Obtained in 79% yield; Light yellow oil; purified by silica gel column chromatography (EA/Petroleum = 1:5);  $^1\text{H NMR}$  (400 MHz,  $\text{CDCl}_3$ )  $\delta$  7.97 (s, 1H), 7.52 (d,  $J = 7.9$  Hz, 1H), 7.32 – 7.27 (m, 1H), 7.24 – 7.15 (m, 2H), 6.98 (s, 1H), 4.89 (dd,  $J = 12.9, 5.2$  Hz, 1H), 4.73 (dd,  $J = 12.9, 10.0$  Hz, 1H), 4.49 (dd,  $J = 10.0, 5.2$  Hz, 1H), 4.22 (q,  $J = 7.5$  Hz, 2H), 3.76 (s, 3H), 2.14 – 2.03 (m, 1H), 2.01 – 1.90 (m, 1H), 1.25 (t,  $J = 7.1$  Hz, 3H), 0.88 (t,  $J = 7.4$  Hz, 3H).  $^{13}\text{C NMR}$  (101 MHz,  $\text{CDCl}_3$ )  $\delta$  166.5, 163.6, 159.4, 136.9, 127.6, 126.8, 126.7, 122.6, 120.2, 118.4, 109.8, 106.9, 89.4, 75.6, 61.8, 41.3, 33.1, 28.9, 14.0, 7.8. HPLC(CHIRAL-OD-H, 210 nm, hexane: i-PrOH =80:20, 2.0mL/min,  $t_{\text{R1}}$ (major) = 14.370 min,  $t_{\text{R1}}$ (minor) = 18.319). dr= 4.8:1. 94% ee. ES-HRMS: Calcd for  $\text{C}_{20}\text{H}_{22}\text{N}_2\text{NaO}_6$  [M+Na], 409.1376, Found 409.1366.

**ethyl (S)-5-ethyl-5-((S)-1-nitropentan-2-yl)-2-oxo-2,5-dihydrofuran-3-carboxylate (3av):**

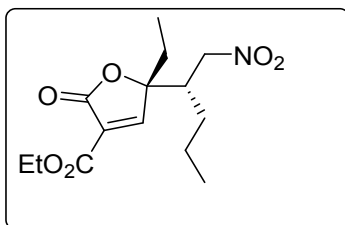

Obtained in 93% yield; Light yellow oil; purified by silica gel column chromatography (EA/Petroleum = 1:5);  $^1\text{H NMR}$  (400 MHz,  $\text{CDCl}_3$ )  $\delta$  8.00 (s, 1H), 4.48 (dd,  $J = 13.9, 5.6$  Hz, 1H), 4.37 (q,  $J = 7.1$  Hz, 2H), 4.28 (dd,  $J = 13.9, 5.8$  Hz, 1H), 2.87 (ddd,  $J = 9.2, 7.3, 4.6$  Hz, 1H), 2.05-1.85 (m, 2H), 1.44 – 1.35 (m, 7H), 1.26 (t,  $J = 7.1$  Hz, 3H), 0.88 (t,  $J = 7.3$  Hz, 3H).  $^{13}\text{C NMR}$  (101 MHz,  $\text{CDCl}_3$ )  $\delta$  166.1, 163.3, 159.6, 127.1, 89.3, 75.1, 62.1, 42.8, 30.8, 28.4, 20.6, 14.1, 13.9, 7.6. HPLC(CHIRAL-OJ-H, 210 nm, hexane: i-PrOH =92:8, 1.0mL/min,  $t_{\text{R1}}$ (minor) = 63.660 min,  $t_{\text{R1}}$ (major) = 69.698 min). dr>20:1. 88% ee. ES-HRMS: Calcd for  $\text{C}_{14}\text{H}_{22}\text{NO}_6$  [M+H], 300.1447, Found 300.1415.

**ethyl (S)-5-ethyl-5-((S)-3-methyl-1-nitrobutan-2-yl)-2-oxo-2,5-dihydrofuran-3-carboxylate (3aw):**

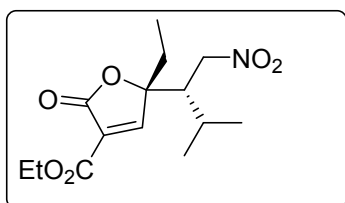

Obtained in 83% yield; Light yellow oil; purified by silica gel column chromatography (EA/Petroleum = 1:5);  $^1\text{H NMR}$  (400 MHz,  $\text{CDCl}_3$ )  $\delta$  8.07 (s, 1H), 4.48 (dd,  $J = 14.6, 6.1$  Hz, 1H), 4.40 – 4.31 (m, 3H), 2.95 (ddd,  $J = 6.4, 4.4, 2.3$  Hz, 1H), 2.03 – 1.84 (m, 2H), 1.38 (t,  $J = 7.1$  Hz, 3H), 1.03 (d,  $J = 7.0$  Hz, 3H), 0.84 (t,  $J = 7.4$  Hz, 3H), 0.82 (d,  $J = 6.8$  Hz, 3H).  $^{13}\text{C NMR}$  (101 MHz,  $\text{CDCl}_3$ )  $\delta$  166.1, 163.8, 159.7, 126.9, 90.2, 71.9, 62.1, 47.8, 29.4, 28.2, 22.4, 17.7, 14.1, 7.6. HPLC(CHIRAL-OD-H, 210 nm, hexane: i-PrOH =95:5, 1.0mL/min,  $t_{\text{R1}}$ (minor) = 13.179 min,  $t_{\text{R1}}$ (major) = 18.070 min,  $t_{\text{R2}}$ (minor) = 49.909 min,  $t_{\text{R2}}$ (major) = 51.397 min). dr>20:1. 96 % ee. ES-HRMS: Calcd for  $\text{C}_{14}\text{H}_{22}\text{NO}_6$  [M+H], 300.1447, Found 300.1436.

**ethyl (S)-5-((S)-1-cyclohexyl-2-nitroethyl)-5-ethyl-2-oxo-2,5-dihydrofuran-3-carboxylate (3ax):**

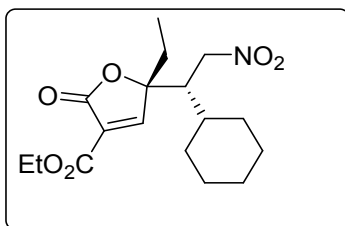

Obtained in 92% yield; Light yellow oil; purified by silica gel column chromatography (EA/Petroleum = 1:5);  $^1\text{H NMR}$  (400 MHz,  $\text{CDCl}_3$ )  $\delta$  8.06 (s, 1H), 4.41 (d,  $J = 5.5$  Hz, 2H), 4.38 (q,  $J = 7.5$  Hz, 2H), 2.91 (td,  $J = 5.5, 2.0$  Hz, 1H), 2.06 – 1.83 (m, 2H), 1.81 – 1.45 (m, 8H), 1.39 (t,  $J = 7.1$  Hz, 3H), 1.19 – 1.05 (m, 3H),



0.85 (t,  $J = 7.4$  Hz, 3H).  $^{13}\text{C}$  NMR (101 MHz,  $\text{CDCl}_3$ )  $\delta$  166.0, 163.7, 159.7, 126.9, 90.1, 72.6, 62.1, 48.2, 38.8, 32.6, 29.5, 28.56, 26.6, 26.3, 25.8, 14.1, 7.6. HPLC(CHIRAL-OJ-H, 210 nm, hexane: i-PrOH = 92:8, 1.0mL/min,  $t_{\text{R1}}$ (major) = 50.012 min,  $t_{\text{R1}}$ (minor) = 66.758 min). dr > 20:1. 90% ee. ES-HRMS: Calcd for  $\text{C}_{17}\text{H}_{25}\text{NNaO}_6$  [ $\text{M}+\text{Na}$ ], 362.1580, Found 362.1548.

**ethyl (S)-5-methyl-5-((S)-2-nitro-1-phenylethyl)-2-oxo-2,5-dihydrofuran-3-carboxylate(3ay):**

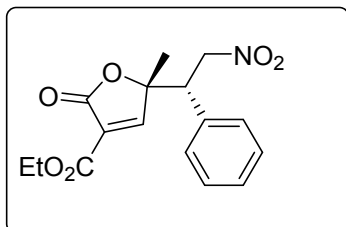

White solid. Obtained in 93% yield; Light yellow oil; purified by silica gel column chromatography (EA/Petroleum = 1:5);  $^1\text{H}$  NMR (400 MHz,  $\text{CDCl}_3$ )  $\delta$  7.89 (s, 1H), 7.35 – 7.21 (m, 3H), 7.11 (d,  $J = 6.5$  Hz, 2H), 4.83 (dd,  $J = 13.4, 5.1$  Hz, 1H), 4.72 (dd,  $J = 13.4, 9.9$  Hz, 1H), 4.19 (q,  $J = 7.1$  Hz, 2H), 3.99 (dd,  $J = 9.9, 5.1$  Hz, 1H), 1.51 (s, 3H), 1.23 (t,  $J = 7.1$  Hz, 3H).  $^{13}\text{C}$  NMR (101 MHz,  $\text{CDCl}_3$ )  $\delta$  164.7, 162.9, 158.4, 132.6, 128.4, 128.1, 127.2,

124.8, 84.5, 74.0, 60.9, 49.5, 22.3, 13.0. HPLC(CHIRAL-OJ-H, 254 nm, hexane: i-PrOH = 97:3, 1.0mL/min,  $t_{\text{R1}}$ (major) = 19.984 min,  $t_{\text{R1}}$ (minor) = 40.539 min,  $t_{\text{R2}}$ (minor) = 25.931 min,  $t_{\text{R2}}$ (major) = 29.097 min). dr = 14.1:1. 90% ee. ES-HRMS: Calcd for  $\text{C}_{16}\text{H}_{18}\text{NO}_6$  [ $\text{M}+\text{H}$ ], 320.1134, Found 320.1113.

**ethyl (S)-5-((S)-2-nitro-1-phenylethyl)-2-oxo-5-propyl-2,5-dihydrofuran-3-carboxylate(3az):**

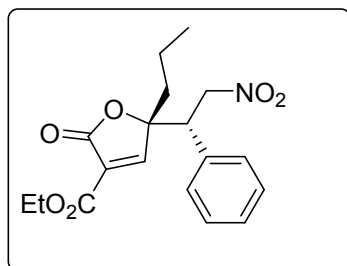

Obtained in 91% yield; Light yellow oil; purified by silica gel column chromatography (EA/Petroleum = 1:5);  $^1\text{H}$  NMR (400 MHz,  $\text{CDCl}_3$ )  $\delta$  7.90 (s, 1H), 7.44 – 7.29 (m, 3H), 7.22 – 7.13 (m, 2H), 4.86 (dd,  $J = 13.4, 5.0$  Hz, 1H), 4.77 (dd,  $J = 13.4, 10.0$  Hz, 1H), 4.26 (q,  $J = 7.1$  Hz, 2H), 4.10 (dd,  $J = 10.0, 5.0$  Hz, 1H), 1.99 – 1.74 (m, 2H), 1.41 – 1.18 (m, 5H), 0.91 (t,  $J = 7.3$  Hz, 3H).  $^{13}\text{C}$  NMR (101 MHz,  $\text{CDCl}_3$ )  $\delta$  166.0, 163.3, 159.3, 133.6, 129.4, 129.0, 128.3, 126.5, 88.2, 75.2, 62.0, 49.8, 37.7, 16.8, 14.1, 13.9.

HPLC(CHIRAL-OJ-H, 254 nm, hexane: i-PrOH = 97:3, 2.0mL/min,  $t_{\text{R1}}$ (minor) = 36.733 min,  $t_{\text{R1}}$ (major) = 40.539 min,  $t_{\text{R2}}$ (minor) = 45.309 min,  $t_{\text{R2}}$ (major) = 52.316 min). dr = 16.3:1. 92% ee. ES-HRMS: Calcd for  $\text{C}_{18}\text{H}_{22}\text{NNaO}_6$  [ $\text{M}+\text{Na}$ ], 370.1267, Found 370.1248.

**methyl (S)-5-ethyl-5-((S)-2-nitro-1-phenylethyl)-2-oxo-2,5-dihydrofuran-3-carboxylate (3ba):**

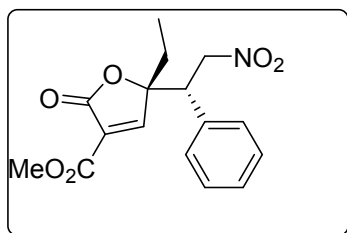

Obtained in 85% yield; Light yellow oil; purified by silica gel column chromatography (EA/Petroleum = 1:5);  $^1\text{H}$  NMR (400 MHz,  $\text{CDCl}_3$ )  $\delta$  7.87 (s, 1H), 7.32 – 7.24 (m, 3H), 7.11 (dd,  $J = 7.8, 1.6$  Hz, 2H), 4.79 (dd,  $J = 13.4, 5.1$  Hz, 1H), 4.70 (dd,  $J = 13.4, 9.9$  Hz, 1H), 4.05 (dd,  $J = 9.9, 5.1$  Hz, 1H), 3.75 (s, 3H), 1.96 (dq,  $J = 14.8, 7.4$  Hz, 1H), 1.80 (dq,  $J = 14.7, 7.4$  Hz, 1H), 0.81 (t,  $J = 7.4$

Hz, 3H).  $^{13}\text{C}$  NMR (101 MHz,  $\text{CDCl}_3$ )  $\delta$  165.0, 162.6, 158.7, 132.6, 128.4, 128.1, 127.2, 125.6, 87.6, 74.1, 51.7, 48.5, 27.8, 6.6. HPLC(CHIRAL-OD-H, 210 nm, hexane: i-PrOH = 70:30, 1.0mL/min,  $t_{\text{R1}}$ (major) = 30.03 min,  $t_{\text{R1}}$ (minor) = 55.70 min). dr = 12.9:1. 80% ee. ES-HRMS: Calcd for  $\text{C}_{16}\text{H}_{18}\text{NO}_6$  [ $\text{M}+\text{H}$ ], 320.1134, Found 320.1120.

**ethyl (SS)-5-ethyl-5-((S)-2-nitro-1-phenylethyl)-2-oxotetrahydrofuran-3-carboxylate(4aa):**

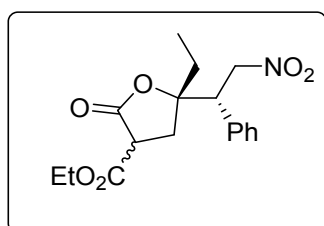

mixture of diastereoisomers(major isomer: minor isomer = 1.7:1); Obtained in 66% yield; Light yellow oil; purified by silica gel column chromatography (EA/Petroleum = 1:5);  $^1\text{H}$  NMR (400 MHz,  $\text{CDCl}_3$ )

$\delta$  7.42 – 7.31 (m, 3H, major isomer + minor isomer), 7.32 – 7.25 (m, 2H, major isomer + minor isomer), 4.97 – 4.86 (m, 2H, major isomer + minor isomer), 4.21-4.08 (m, 2H, major isomer + minor isomer), 3.70(dd,  $J$  = 9.8, 5.4 Hz, 1H, major isomer), 3.61 (t,  $J$  = 10.3 Hz, 1H, minor isomer), 2.66 (dd,  $J$  = 13.6, 10.2 Hz, 1H, minor isomer), 2.53 (dd,  $J$  = 13.0, 8.7 Hz, 1H, major isomer), 2.36 – 2.14 (m, 2H, major isomer + minor isomer), 1.96 (q,  $J$  = 7.5 Hz, 2H, major isomer), 1.86 – 1.63 (m, 2H, minor isomer), 1.23 (td,  $J$  = 7.2, 3.1 Hz, 3H, major isomer + minor isomer), 1.12 (t,  $J$  = 7.5 Hz, 3H, major isomer), 1.04 (t,  $J$  = 7.4 Hz, 3H, minor isomer).  $^{13}\text{C}$  NMR (101 MHz,  $\text{CDCl}_3$ )  $\delta$  171.2(major isomer), 170.5(minor isomer), 167.4(major isomer), 167.1(minor isomer), 134.42(minor isomer), 134.1(major isomer), 129.5(major isomer), 129.4(minor isomer), 129.2(major isomer+minor isomer), 129.0(major isomer), 128.7(minor isomer), 87.6(major isomer+minor isomer), 76.2(minor isomer), 75.7(major isomer), 62.5(minor isomer), 62.4(major isomer), 50.0(major isomer), 49.6(minor isomer), 46.8(minor isomer), 46.7(major isomer), 33.4(major isomer+minor isomer), 31.6(major isomer+minor isomer), 14.0(major isomer+minor isomer), 7.7(major isomer+minor isomer). ES-HRMS: Calcd for  $\text{C}_{17}\text{H}_{21}\text{NNaO}_6$  [M+Na], 358.1267, Found 358.1274.

### 3. Single Crystal X-Ray Diffraction of 3ay.

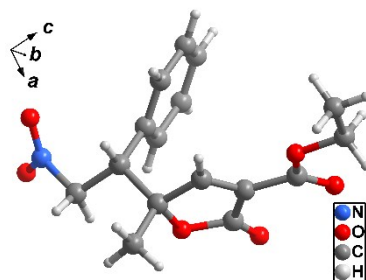

| <b>Table 1 Crystal data and structure refinement for 3ay.</b> |                                                                              |
|---------------------------------------------------------------|------------------------------------------------------------------------------|
| Identification code                                           | <b>3ay</b>                                                                   |
| CCDC                                                          | 1958966                                                                      |
| Empirical formula                                             | C <sub>16</sub> H <sub>17</sub> NO <sub>6</sub>                              |
| Formula weight                                                | 319.30                                                                       |
| Temperature/K                                                 | 298.15                                                                       |
| Crystal system                                                | orthorhombic                                                                 |
| Space group                                                   | <i>P</i> 2 <sub>1</sub> 2 <sub>1</sub> 2 <sub>1</sub>                        |
| <i>a</i> /Å                                                   | 8.1801(8)                                                                    |
| <i>b</i> /Å                                                   | 11.5319(9)                                                                   |
| <i>c</i> /Å                                                   | 16.4021(14)                                                                  |
| $\alpha$ /°                                                   | 90                                                                           |
| $\beta$ /°                                                    | 90                                                                           |
| $\gamma$ /°                                                   | 90                                                                           |
| Volume/Å <sup>3</sup>                                         | 1547.2(2)                                                                    |
| <i>Z</i>                                                      | 4                                                                            |
| $\rho_{\text{calc}}$ /cm <sup>3</sup>                         | 1.371                                                                        |
| $\mu$ /mm <sup>-1</sup>                                       | 0.891                                                                        |
| <i>F</i> (000)                                                | 672.0                                                                        |
| Crystal size/mm <sup>3</sup>                                  | 0.4 × 0.15 × 0.13                                                            |
| Radiation                                                     | CuK $\alpha$ ( $\lambda$ = 1.54178)                                          |
| 2 $\theta$ range for data collection/°                        | 9.374 to 129.972                                                             |
| Index ranges                                                  | -9 ≤ <i>h</i> ≤ 5, -13 ≤ <i>k</i> ≤ 8, -14 ≤ <i>l</i> ≤ 19                   |
| Reflections collected                                         | 3340                                                                         |
| Independent reflections                                       | 2339 [ <i>R</i> <sub>int</sub> = 0.0379, <i>R</i> <sub>sigma</sub> = 0.0757] |
| Data/restraints/parameters                                    | 2339/0/211                                                                   |
| Goodness-of-fit on <i>F</i> <sup>2</sup>                      | 1.031                                                                        |

|                                                |                                  |
|------------------------------------------------|----------------------------------|
| Final R indexes [ $I \geq 2\sigma(I)$ ]        | $R_1 = 0.0501$ , $wR_2 = 0.1033$ |
| Final R indexes [all data]                     | $R_1 = 0.0679$ , $wR_2 = 0.1163$ |
| Largest diff. peak/hole / $e \text{ \AA}^{-3}$ | 0.21/-0.21                       |
| Flack parameter                                | 0.2(4)                           |

## 4. DFT calculations

### 4.1 Computational Information

DFT<sup>1</sup> studies have been performed with the Gaussian09 program<sup>2</sup> using the B3LYP<sup>3</sup> method. The 6-31G\* basis set was used for the system. The structures were optimized with SMD<sup>4</sup> method in 1,4-dioxane ( $\epsilon=2.2099$ ). Harmonic vibrational frequency calculations show that all structures were shown to be stationary points (with no imaginary frequency) or transition states (with one imaginary frequency). The 3D molecular figures were prepared using CYLView.<sup>5</sup>

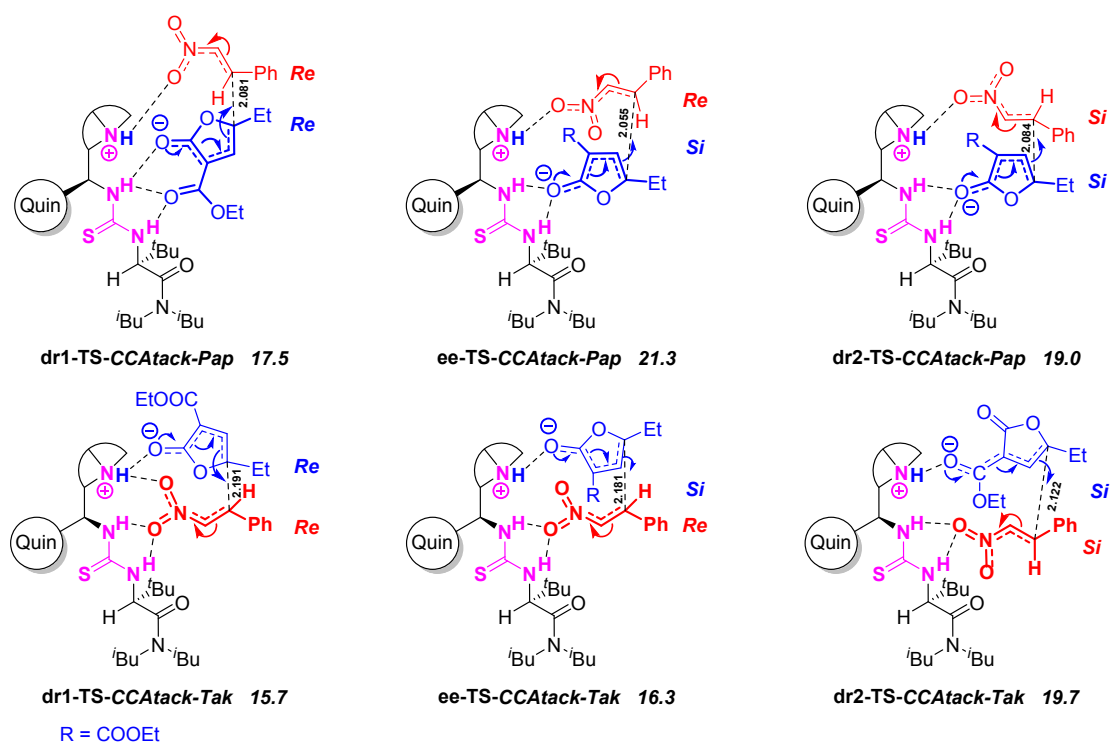

**Figure 1** Transition states of the C-C bond formation leading to other chiral isomers. The relative free energies ( $\Delta G_{\text{sol}}$ , 285.15 K, 1.0 atm) in 1,4-dioxane are in kcal/mol. The selected bond lengths are in Å. Calculated at the B3LYP/6-31G\* level.

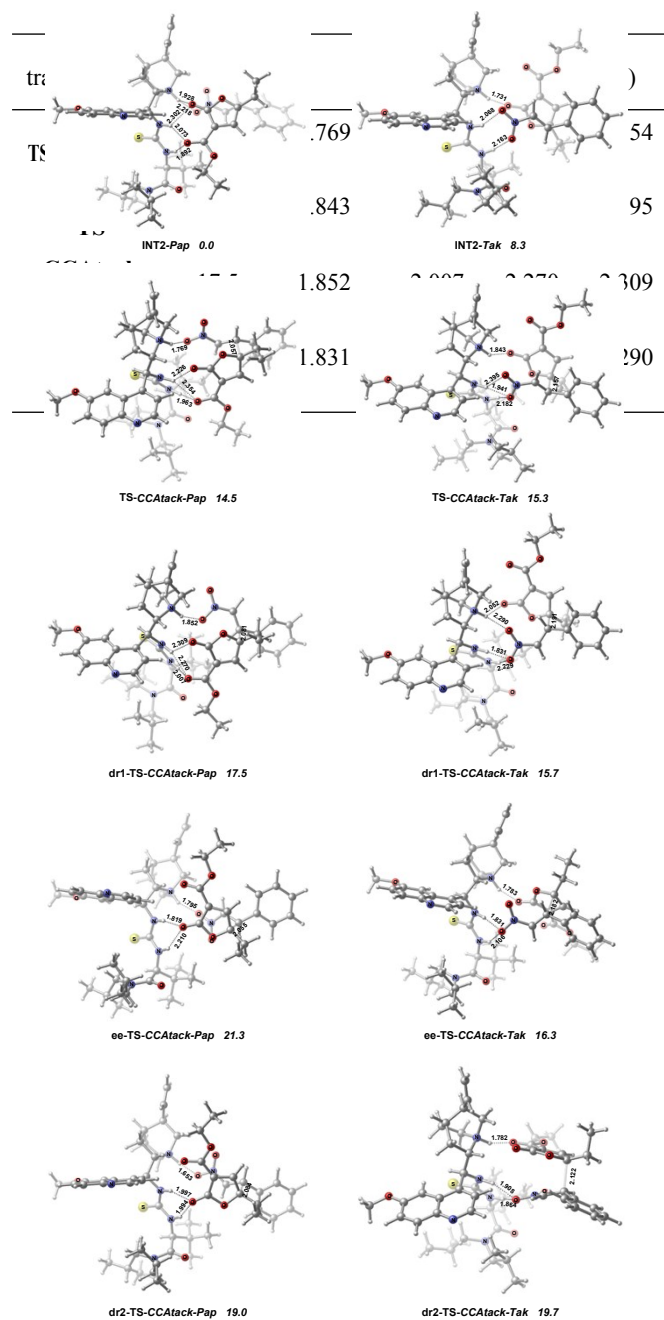

**Figure 2.** Optimized structures of intermediates and transition states of the C-C bond formation (*INT2-Pap*, *INT2-Tak*, *TS-CCAtack-Pap*, *TS-CCAtack-Tak*, *dr1-TS-CCAtack-Pap*, *dr1-TS-CCAtack-Tak*, *ee-TS-CCAtack-Pap*, *ee-TS-CCAtack-Tak*, *dr2-TS-CCAtack-Pap* and *dr2-TS-CCAtack-Tak*). The selected bond lengths are in Å. The relative free energies ( $\Delta G_{\text{sol}}$ , 285.15 K, 1.0 atm) in 1,4-dioxane are in kcal/mol. Calculated at the B3LYP/6-31G\* level.

**Table 1.** The distance of O.....HN in each transition state.

## 4.2 Calculated total energies and cartesian coordinates

### INT2-Pap

E(RB3LYP)= -3353.35786666 Hartree

Sum of electronic and thermal Free Energies= -3352.273641 Hartree

C,0,-0.768544987,3.0806805862,0.0938454468  
C,0,-0.7904799403,5.1211266881,-1.4050410688  
C,0,-1.4660263402,4.4356807905,-0.2004960389  
H,0,-0.2823566952,3.0849837276,1.0685831405  
H,0,-2.5253184772,4.2776856682,-0.4254632746  
H,0,-1.4286430749,5.0765983013,0.6850254243  
C,0,-0.0364700182,2.8944630822,-2.3141498969  
H,0,0.8830320411,2.82218409,-2.8964682565  
H,0,-0.6089882828,1.9780876126,-2.4668516653  
C,0,-0.8565992226,4.1697100814,-2.6165427433  
H,0,-0.4633262579,4.6639128117,-3.5110193853  
H,0,-1.8988368565,3.9063862479,-2.8271252412  
H,0,-1.308170577,6.0575141729,-1.633426479  
C,0,0.7061043673,5.4164598977,-1.1036272309  
H,0,1.1696737728,5.7408898087,-2.0429091417  
C,0,1.3595678485,4.0802133643,-0.6581642558  
H,0,2.2551490166,3.8407447421,-1.2339683367  
H,0,1.6224250165,4.0589473257,0.4000735997  
N,0,0.3941543262,2.9394022535,-0.8720594463  
C,0,0.9211008276,6.5049795242,-0.0844088513  
H,0,0.5811085071,6.2948517467,0.9305867618  
C,0,1.4914490622,7.6815460986,-0.3455424432  
H,0,1.6153049546,8.4380672234,0.4253185565  
H,0,1.8585468059,7.9356106388,-1.3385984968  
C,0,-1.7299460198,1.8627464145,0.0262971164  
H,0,-2.3341277532,1.9373587676,-0.8761448427  
C,0,-2.6349960317,1.8920580671,1.2658654138  
C,0,-4.0345770044,2.1993093684,1.2015219214  
C,0,-2.0890240391,1.6188283083,2.5035768873

C,0,-4.7432911685,2.4781451537,0.00795395  
C,0,-4.7557671888,2.2212759089,2.446160559  
C,0,-2.8982191378,1.6556452107,3.662526287  
H,0,-1.0385395154,1.3607591639,2.6048051209  
C,0,-6.0942491661,2.7834373795,0.0298970145  
H,0,-4.259252815,2.4289426274,-0.9603392855  
C,0,-6.1373864721,2.5356328191,2.4320331953  
H,0,-2.4530828034,1.4342653493,4.6317226135  
C,0,-6.8012391636,2.8157354901,1.2597118392  
H,0,-6.6571610073,2.5470778766,3.3852994522  
H,0,-7.8590077862,3.0519628626,1.2841531215  
N,0,-1.0150808528,0.5961582674,-0.0910072942  
O,0,-6.6685925281,3.0418216671,-1.1787125126  
C,0,-8.0642399055,3.3096380809,-1.230518513  
H,0,-8.2974711963,3.4639085151,-2.2862601099  
H,0,-8.6553480841,2.4645328172,-0.8551472231  
H,0,-8.3283236367,4.2171579061,-0.6722295627  
N,0,-4.1810616079,1.9523902184,3.6540406742  
H,0,-0.3604611112,0.351219469,0.6607202589  
C,0,-1.3840202541,-0.408950619,-0.9432320799  
N,0,-0.8367827471,-1.6063941814,-0.6388488393  
H,0,-0.3267198712,-1.6596375818,0.2491249454  
S,0,-2.4044073349,-0.1447625365,-2.2943358051  
O,0,3.731006796,1.5565893307,1.6943797165  
O,0,1.5201335789,1.5811427657,1.1588382941  
O,0,1.908733472,-2.4224720984,2.9665757921  
O,0,0.3755320392,-1.120028116,1.9215797228  
C,0,1.5476899306,-1.2846400328,2.316350747  
C,0,2.4820664398,0.9390655787,1.6284934926  
C,0,2.6225207523,-0.3593525989,2.177296117  
C,0,4.0030933891,-0.4882575203,2.5924584175  
C,0,4.630384241,0.6707696398,2.2856852785  
C,0,6.0163651433,1.1785035389,2.5012741855  
C,0,0.8654493092,-3.388070293,3.2201677498  
C,0,1.4774143876,-4.5051170372,4.0437532569  
H,0,4.4510492749,-1.3481935041,3.0720327668  
H,0,6.4502916645,1.5122633461,1.5472614186  
H,0,0.0483220816,-2.8957139019,3.7590976397  
H,0,0.4678721733,-3.7577096933,2.2706331491  
H,0,2.2928550933,-4.9954650746,3.500550458  
H,0,0.7153469156,-5.2606111233,4.2674719573  
H,0,1.8742285821,-4.1265987464,4.992551373  
H,0,6.631352749,0.3386470007,2.8466799615



C,0,5.8345758386,0.6279439177,-2.0065697138  
H,0,5.9643422723,1.4895719687,-2.6569040814  
C,0,4.5824652191,0.3559533447,-1.597521474  
H,0,4.2587212879,-0.4699798707,-0.9810996081  
C,0,7.0330899455,-0.1303766691,-1.6785143784  
C,0,8.2217795829,0.168248336,-2.3720627936  
C,0,7.054486616,-1.1466023398,-0.7005861024  
C,0,9.393221254,-0.5381457761,-2.1135022247  
H,0,8.215280118,0.9551984632,-3.1221271871  
C,0,8.2276271847,-1.8452857651,-0.4416245685  
H,0,6.1595701919,-1.3698148593,-0.1274230008  
C,0,9.397929895,-1.5474854776,-1.1490154325  
H,0,10.300916317,-0.3003797173,-2.6608183633  
H,0,8.2342784225,-2.6223851543,0.3173764633  
H,0,10.311805517,-2.0974770627,-0.94179689  
N,0,3.4884631797,1.1940332132,-1.9971513805  
O,0,3.6987799204,2.2465924992,-2.6176666996  
O,0,2.3540076987,0.8009726964,-1.6835259573  
H,0,0.901504958,2.078457196,-0.5982090734  
C,0,-0.9296675786,-2.8482951174,-1.4106577597  
H,0,-1.6385279056,-2.6611897964,-2.2146105882  
C,0,0.4335565297,-3.237655537,-2.0921159516  
C,0,1.6267227302,-3.198678994,-1.117238566  
H,0,1.7775593104,-2.1916393129,-0.7118976106  
H,0,1.4919384648,-3.892271527,-0.2857644685  
H,0,2.5449472337,-3.4732986229,-1.6527356548  
C,0,0.7049018357,-2.2303887936,-3.2281173178  
H,0,-0.08992915,-2.2417783055,-3.9829478814  
H,0,0.7993625661,-1.2069947008,-2.8523944198  
H,0,1.6466850582,-2.484460826,-3.7313143788  
C,0,0.3120623775,-4.6434281411,-2.71083504  
H,0,-0.5138670671,-4.696280479,-3.4310462255  
H,0,1.2316685661,-4.8927984011,-3.2544800899  
H,0,0.1583236936,-5.4123580043,-1.9483556006  
C,0,-1.4773608836,-3.9278835297,-0.4377788679  
O,0,-0.6978086009,-4.5480416328,0.296436128  
N,0,-2.8239099184,-4.1565663265,-0.3631959654  
C,0,-3.266329802,-5.1440779156,0.6381086042  
H,0,-4.2822472425,-5.4485796319,0.365757253  
H,0,-2.6224044294,-6.0242838461,0.5546541321  
C,0,-3.8801874236,-3.4885079489,-1.1382343241  
H,0,-4.6377936644,-3.1406904697,-0.4267535856  
H,0,-3.4813667356,-2.5894520673,-1.6100393496

C,0,-3.253222949,-4.6535405642,2.101166805  
H,0,-2.220402995,-4.374383892,2.3371711319  
C,0,-3.6589190505,-5.8144993005,3.0195994151  
H,0,-3.0003163187,-6.682080121,2.8894835408  
H,0,-3.6113774365,-5.516777519,4.073823813  
H,0,-4.6875267028,-6.1439353267,2.81784381  
C,0,-4.1448875591,-3.4283523883,2.3346249067  
H,0,-3.8326938555,-2.5744428612,1.7237911719  
H,0,-5.1983952307,-3.6444649168,2.1092087781  
H,0,-4.0951670381,-3.1102140652,3.3832300942  
C,0,-4.5712644855,-4.3706670856,-2.2012803619  
H,0,-4.9832521361,-5.2581615894,-1.6988608411  
C,0,-5.745424359,-3.5881738456,-2.8061389458  
H,0,-5.3954876087,-2.6831398125,-3.3189160619  
H,0,-6.2886939411,-4.1963722658,-3.5391616827  
H,0,-6.4619757503,-3.2764530857,-2.036099782  
C,0,-3.606780032,-4.8540075632,-3.2891477325  
H,0,-2.7725873201,-5.4222882799,-2.8638965141  
H,0,-4.1218730064,-5.509823095,-4.0017747883  
H,0,-3.1937129307,-4.010879084,-3.8578617054  
C,0,6.0997508253,2.3345737193,3.5131217616  
H,0,7.1353570634,2.6759308665,3.6318236311  
H,0,5.4980644416,3.1880849229,3.1824285495  
H,0,5.7280643647,2.0222994029,4.4957435272

-----

### **INT2-Tak**

E(RB3LYP)= -3353.34539888 Hartree

Sum of electronic and thermal Free Energies= -3352.260459 Hartree

C,0,-0.8450053867,2.8219329614,0.3197742666  
C,0,-0.8543065065,5.2020514812,-0.5682312639  
C,0,-1.4583730587,4.2432006544,0.4771894249  
H,0,-0.296662577,2.5393248658,1.2189737315  
H,0,-2.5429900517,4.2038568924,0.3431937054  
H,0,-1.2857105492,4.6136599437,1.4916856151  
C,0,-0.3271984074,3.2821937541,-2.099922575  
H,0,0.5372161727,3.3462183454,-2.762092903  
H,0,-0.9491413577,2.4551128475,-2.4435423297  
C,0,-1.0968925071,4.6154995323,-1.9721259123  
H,0,-0.7578401167,5.3157902628,-2.7422128212  
H,0,-2.1687372622,4.4568028192,-2.1324386403  
H,0,-1.3302640397,6.1836549458,-0.4838724214  
C,0,0.679890786,5.3427273479,-0.3642155475  
H,0,1.0831694491,5.8631914396,-1.2411476394

C,0,1.2700288114,3.9098457675,-0.3168334137  
H,0,2.139882345,3.7632674801,-0.9583724364  
H,0,1.5642920564,3.6196882519,0.6951883983  
N,0,0.2254102244,2.9059485862,-0.7495941414  
C,0,1.0596826044,6.138534044,0.8570520255  
H,0,0.7572490358,5.7245349277,1.8204292072  
C,0,1.7310722727,7.2900329657,0.8291724709  
H,0,1.9754124537,7.8305989196,1.7402365298  
H,0,2.0670065398,7.7366742272,-0.1050605565  
C,0,-1.9002293511,1.7253572813,0.0298165168  
H,0,-2.5252052943,2.0297175925,-0.8083168924  
C,0,-2.7743725156,1.5467987418,1.282287236  
C,0,-4.1301137066,2.0074716028,1.3665288815  
C,0,-2.2311752563,0.937808018,2.395304662  
C,0,-4.8334037988,2.6334365367,0.3095041262  
C,0,-4.8092129601,1.8140278186,2.6199755074  
C,0,-2.9970146118,0.7878413963,3.5744133518  
H,0,-1.2105273479,0.5652566983,2.3833086926  
C,0,-6.1394133659,3.0650563697,0.4721187091  
H,0,-4.3869641635,2.7580795179,-0.6691555403  
C,0,-6.1453608264,2.2679804845,2.7522851305  
H,0,-2.5526084276,0.3032305767,4.4429893913  
C,0,-6.8033637254,2.8839950043,1.7132349629  
H,0,-6.6353247145,2.1106830485,3.7083164134  
H,0,-7.8256939407,3.218355246,1.8474017395  
N,0,-1.2425341557,0.488545722,-0.3774502587  
O,0,-6.7153526016,3.6531307635,-0.6130097179  
C,0,-8.0761819049,4.0607185422,-0.5288735663  
H,0,-8.3247690947,4.4676224284,-1.5112256892  
H,0,-8.7415993447,3.2149596688,-0.3143333012  
H,0,-8.2213540677,4.8427790016,0.2276631252  
N,0,-4.2370358194,1.2110013485,3.7018712999  
H,0,-0.4162740638,0.2246737733,0.1595490956  
C,0,-1.8461826031,-0.4733370107,-1.1431473966  
N,0,-1.1332603896,-1.6203803151,-1.2490651918  
H,0,-0.2362965417,-1.6541484171,-0.7661967456  
S,0,-3.3483880503,-0.2097291176,-1.9008345649  
O,0,3.0509371466,-0.8954997698,-1.7449004254  
O,0,1.9557261292,1.0875390242,-1.6991678759  
O,0,6.2096440764,2.2686928163,-0.9067354277  
O,0,4.2070039486,3.2742230118,-1.2223680721  
C,0,4.8620577252,2.235784404,-1.1559573943  
C,0,3.0419846253,0.495229763,-1.5830926064

C,0,4.3905548633,0.8835293952,-1.3226024727  
C,0,5.1794351121,-0.3122985207,-1.340725646  
C,0,4.3447126883,-1.3601420295,-1.5872058928  
C,0,4.5854679259,-2.8058926697,-1.8707139234  
C,0,6.7913711972,3.575579778,-0.7667498187  
C,0,8.2737937449,3.3934817902,-0.5003043531  
H,0,6.2476505261,-0.3751618506,-1.1870560506  
H,0,3.7920963913,-3.4093164667,-1.4109971868  
H,0,6.6168453047,4.1528256771,-1.6818884727  
H,0,6.2987586087,4.1095488193,0.0539824533  
H,0,8.4424454926,2.8199633171,0.4178276144  
H,0,8.7550216311,4.3718408982,-0.3858579268  
H,0,8.761657347,2.8669579347,-1.3277654233  
H,0,5.5289918715,-3.0956403621,-1.3923888554  
C,0,3.8923802905,-1.6876082493,1.4672479185  
H,0,3.3514773479,-2.5525127804,1.0953481923  
C,0,3.1935183935,-0.5304058462,1.5740052357  
H,0,3.5648177215,0.4177244519,1.9325522084  
C,0,5.2623143865,-1.9084229098,1.9051324896  
C,0,5.7542440421,-3.2291896167,1.9195807586  
C,0,6.1170260124,-0.8691152594,2.329297319  
C,0,7.0490659223,-3.5052390891,2.3510456665  
H,0,5.1062655433,-4.0389971756,1.5942108872  
C,0,7.4095949574,-1.1481629332,2.7561108353  
H,0,5.7745728696,0.1605962219,2.3013432457  
C,0,7.8808481249,-2.4660776497,2.7718522846  
H,0,7.4086541158,-4.5304154081,2.358147366  
H,0,8.0576478884,-0.3358994327,3.0736177533  
H,0,8.8926200123,-2.6780870483,3.106402025  
N,0,1.8357559544,-0.4688738977,1.1941468241  
O,0,1.2246671422,-1.4879982973,0.8200450275  
O,0,1.2692593309,0.6494782173,1.2790173889  
H,0,0.7434363104,2.0054321896,-0.8719789297  
C,0,-1.5718846335,-2.8746307259,-1.87622032  
H,0,-2.6219185013,-2.732322178,-2.1270833077  
C,0,-0.8347892223,-3.193498759,-3.2232914225  
C,0,0.6998097005,-3.177168243,-3.0965004472  
H,0,1.069102037,-2.2041054609,-2.7566842622  
H,0,1.0513326254,-3.9418896746,-2.4024425374  
H,0,1.1447184377,-3.3666560543,-4.0819351462  
C,0,-1.2439069104,-2.1304868915,-4.2626483352  
H,0,-2.3263213228,-2.1171448571,-4.4327705873  
H,0,-0.9421063576,-1.1242220878,-3.9558897021

H,0,-0.7541380691,-2.3446486458,-5.2210115499  
C,0,-1.3045079968,-4.5717989317,-3.7296452419  
H,0,-2.3955120994,-4.6097851557,-3.8448081488  
H,0,-0.8679047978,-4.7755335186,-4.7150833105  
H,0,-0.9974737588,-5.3771022107,-3.0562979128  
C,0,-1.4150156652,-3.9742952616,-0.7869087453  
O,0,-0.3721691037,-4.6302642366,-0.7061678385  
N,0,-2.4196232645,-4.1606911513,0.1257497183  
C,0,-2.1553845108,-5.1409363596,1.1941514523  
H,0,-3.1190931199,-5.3937388528,1.6487382174  
H,0,-1.7568542083,-6.05023648,0.7340328892  
C,0,-3.7272896245,-3.4915133898,0.150047679  
H,0,-3.8966013762,-3.1350459665,1.1729053858  
H,0,-3.7010089186,-2.6000507874,-0.4778150007  
C,0,-1.1792428128,-4.6641202183,2.2896155262  
H,0,-0.2313285803,-4.4281539142,1.7939696118  
C,0,-0.9324914409,-5.8121529242,3.2780511912  
H,0,-0.5426300273,-6.7036610154,2.7713980755  
H,0,-0.2031258506,-5.5216239141,4.0436936428  
H,0,-1.8568064416,-6.1013527112,3.7971552655  
C,0,-1.6684074143,-3.404314309,3.0140218963  
H,0,-1.7996621075,-2.5652146744,2.3219520835  
H,0,-2.6246183063,-3.575857918,3.5273597175  
H,0,-0.9421102496,-3.0888201939,3.7736295399  
C,0,-4.9177103611,-4.3811263111,-0.271756486  
H,0,-4.928991173,-5.2689221854,0.3775680573  
C,0,-6.225728694,-3.6125374959,-0.0389039545  
H,0,-6.2675813788,-2.7058936603,-0.6558540323  
H,0,-7.0947096876,-4.2301913209,-0.2952905761  
H,0,-6.333780396,-3.3056195048,1.0088596588  
C,0,-4.8064807214,-4.8622658053,-1.7225248981  
H,0,-3.8802692045,-5.4223391065,-1.8920852208  
H,0,-5.6424441469,-5.5252535796,-1.97688958  
H,0,-4.8311404135,-4.0184213046,-2.4239371659  
C,0,4.6533599321,-3.1324570628,-3.3740688664  
H,0,4.8105702436,-4.2066226829,-3.5304365425  
H,0,3.7248835399,-2.8502321663,-3.880813498  
H,0,5.4776666139,-2.5928943729,-3.8542149319

-----

**TS-CCAttack-Pap**

E(RB3LYP)= -3353.33970951 Hartree

Sum of electronic and thermal Free Energies= -3352.250535 Hartree

C,0,-1.8007476404,2.8000984042,0.4674842339

C,0,-3.2587940229,4.6312426568,-0.521605875  
C,0,-3.0185005597,3.7371343946,0.7106037961  
H,0,-0.9948544431,3.0081866594,1.1689527924  
H,0,-3.9190114082,3.1454063298,0.9019138867  
H,0,-2.8500623003,4.3425034353,1.605914176  
C,0,-2.1547089733,2.9473474622,-2.0249641971  
H,0,-1.6274579029,3.2932125306,-2.9161066617  
H,0,-2.3111161904,1.8713274784,-2.1242783733  
C,0,-3.4599068949,3.726608125,-1.7529121283  
H,0,-3.7268250044,4.3262423506,-2.6293010145  
H,0,-4.2884776625,3.0319926037,-1.5759847851  
H,0,-4.1453846529,5.2514798442,-0.3592702333  
C,0,-2.0260637535,5.5388821146,-0.7900992671  
H,0,-2.163826546,5.996314962,-1.7774237635  
C,0,-0.7776626928,4.6194319728,-0.8332143505  
H,0,-0.1403860398,4.7814237813,-1.7015064555  
H,0,-0.1464813863,4.7218306466,0.0518212226  
N,0,-1.2034289242,3.1693633404,-0.8775795062  
C,0,-1.8574880633,6.651270209,0.2117765211  
H,0,-1.6688038533,6.3508117847,1.2435305115  
C,0,-1.9195699809,7.9500382321,-0.0832703936  
H,0,-1.7964885366,8.7148083365,0.6795318315  
H,0,-2.091396425,8.3017005724,-1.0992489539  
C,0,-2.1710098875,1.299083419,0.5736510419  
H,0,-3.0253855733,1.0969614566,-0.0694578528  
C,0,-2.5329383669,0.9842018291,2.032994134  
C,0,-3.8629486663,0.6366559279,2.4449884076  
C,0,-1.550294056,1.0383781139,3.0007881371  
C,0,-4.9702880484,0.5159014227,1.5709188209  
C,0,-4.0719122619,0.4037276189,3.8492757393  
C,0,-1.867466923,0.7707189129,4.352739566  
H,0,-0.5237287526,1.280896868,2.7400030962  
C,0,-6.2315103093,0.1998914334,2.0493716654  
H,0,-4.8596170444,0.6339679344,0.4993752606  
C,0,-5.3744837213,0.0810464802,4.3042540823  
H,0,-1.0802383114,0.8152884322,5.1044632153  
C,0,-6.4375330977,-0.0171549918,3.4362330694  
H,0,-5.5049856389,-0.088467863,5.3686732147  
H,0,-7.4212411275,-0.2665171553,3.8172179816  
N,0,-1.1049086307,0.4284927434,0.0876178287  
O,0,-7.2217029369,0.1169356314,1.1171170946  
C,0,-8.5318088756,-0.2406672284,1.5402919178  
H,0,-9.1416500103,-0.2567108649,0.6344790331

H,0,-8.5532280608,-1.2363861042,2.0014963452  
H,0,-8.9508386115,0.4957476877,2.2382891727  
N,0,-3.0768278469,0.4741796483,4.7802072445  
H,0,-0.200252123,0.51315525,0.5550009367  
C,0,-1.3131503044,-0.6592790711,-0.7131834112  
N,0,-0.2836891354,-1.5371177309,-0.725866424  
H,0,0.4627229509,-1.3822521923,-0.0470545734  
S,0,-2.7392086473,-0.859793387,-1.6381787699  
O,0,3.1393631913,3.1861646448,0.785685912  
O,0,1.1230181374,2.2110073363,1.1201735731  
O,0,3.7659994274,-1.2676427023,1.6568081842  
O,0,1.5737187319,-0.7530286244,1.4433517146  
C,0,2.7563580041,-0.4137266535,1.4238487879  
C,0,2.3414215154,2.0920413303,1.0199886043  
C,0,3.2258217875,0.9423590548,1.159907279  
C,0,4.5170666547,1.3926869498,0.9843534823  
C,0,4.4626022368,2.7544134237,0.5739759365  
C,0,5.4970588377,3.802795122,0.8959927878  
C,0,3.4061145647,-2.644866177,1.9568268589  
C,0,4.6922961974,-3.4425047389,2.02122843  
H,0,5.4191202314,0.7967200382,1.0173316502  
H,0,5.2772175074,4.7089644044,0.3181540143  
H,0,2.8737680201,-2.6565980706,2.9142666641  
H,0,2.7308699012,-3.0172707578,1.1832545824  
H,0,5.2174396789,-3.420322578,1.0602668432  
H,0,4.4597483411,-4.4871253672,2.2565531915  
H,0,5.3658837907,-3.0575319583,2.7947323858  
H,0,6.4706835044,3.4345086843,0.5536164217  
C,0,4.4415336531,2.5783771585,-1.4754996214  
H,0,4.400037416,3.6580370833,-1.597178829  
C,0,3.227424823,1.9368732224,-1.8155274598  
H,0,3.1099151444,0.8742091587,-1.9559424764  
C,0,5.7395117273,1.9734712805,-1.8815550085  
C,0,6.8014605742,2.8129997851,-2.2580113999  
C,0,5.9506654508,0.5832625231,-1.9199627155  
C,0,8.0303889143,2.2868285964,-2.6587437493  
H,0,6.6553233304,3.8903871565,-2.2492360569  
C,0,7.1769421347,0.0572598361,-2.3204335795  
H,0,5.153177417,-0.0949653392,-1.6300522757  
C,0,8.2239303405,0.9058557299,-2.69109448  
H,0,8.8341477668,2.9584601021,-2.9493869522  
H,0,7.315788113,-1.0206076751,-2.3439372551  
H,0,9.1792737125,0.492365328,-3.0031082608

N,0,2.0619628395,2.6420493314,-1.936792307  
O,0,2.0419055583,3.8988698248,-1.9052858658  
O,0,0.9737124957,1.9772450929,-2.0914279502  
H,0,-0.3376824752,2.6128068931,-1.0888329706  
C,0,-0.1370063133,-2.7173445945,-1.5831970921  
H,0,-1.0810963818,-2.8272513962,-2.1124615123  
C,0,0.9717286258,-2.5328353919,-2.6824064495  
C,0,2.3395062833,-2.1122172284,-2.1096989033  
H,0,2.2537142746,-1.1859912066,-1.5303340168  
H,0,2.7669783765,-2.8853626983,-1.470123093  
H,0,3.0343134243,-1.9168162687,-2.9365183533  
C,0,0.5043050582,-1.429587357,-3.6546950745  
H,0,-0.4793563052,-1.6502343152,-4.0845493419  
H,0,0.4526902678,-0.4512334706,-3.1665236674  
H,0,1.2188877375,-1.3430447414,-4.4829107097  
C,0,1.1246550238,-3.8506006766,-3.4652722695  
H,0,0.1806617956,-4.1538911183,-3.9339455881  
H,0,1.8604566328,-3.7244755582,-4.2687646766  
H,0,1.4723797137,-4.6669212307,-2.8242414275  
C,0,0.1060676624,-3.919388214,-0.6310206434  
O,0,1.252182238,-4.1613040996,-0.2291038907  
N,0,-0.9482292142,-4.6725810488,-0.1949741474  
C,0,-0.6325367742,-5.7341566004,0.7791128149  
H,0,-1.4792326578,-6.4280190111,0.7896468612  
H,0,0.2405708519,-6.2818490747,0.4135586448  
C,0,-2.3657939455,-4.5075688453,-0.5528877943  
H,0,-2.9372425101,-4.4832078018,0.3819703071  
H,0,-2.5180797022,-3.5336098567,-1.0199798009  
C,0,-0.3516433641,-5.2457974915,2.2158910911  
H,0,0.4955780846,-4.55320794,2.1599478742  
C,0,0.0652798572,-6.4448163765,3.0788085966  
H,0,0.9468728802,-6.9524604053,2.6680497004  
H,0,0.3099820546,-6.1268712888,4.0993295224  
H,0,-0.7421549411,-7.1864927884,3.1508182083  
C,0,-1.5377345366,-4.5024392101,2.8421393785  
H,0,-1.8139344588,-3.6139391621,2.2641349306  
H,0,-2.423330581,-5.1479192994,2.9226001047  
H,0,-1.2887025507,-4.1633640423,3.855163514  
C,0,-2.9452537438,-5.6183729671,-1.4567344119  
H,0,-2.7993668479,-6.5839780159,-0.9512193915  
C,0,-4.4564842722,-5.3977917076,-1.611048332  
H,0,-4.6702629558,-4.4438888945,-2.1098586874  
H,0,-4.9093230485,-6.1956191344,-2.2116660126



H,0,-4.9648128136,-5.3851832554,-0.6388418667  
C,0,-2.253433649,-5.6950715398,-2.8214485792  
H,0,-1.1762958523,-5.8644721257,-2.7192150088  
H,0,-2.6613047708,-6.5209904284,-3.4168701082  
H,0,-2.4036718351,-4.7716432906,-3.3956252965  
C,0,5.5678498286,4.1565398825,2.3892114537  
H,0,6.3189238607,4.935946843,2.5639362896  
H,0,4.6044204774,4.5298705618,2.7520837678  
H,0,5.8406196945,3.2832909839,2.992834009

-----

**TS-CCAttack-Tak**

E(RB3LYP)= -3353.33753666 Hartree

Sum of electronic and thermal Free Energies= -3352.249333 Hartree

C,0,1.2597377203,2.7561665333,-0.2637440623  
C,0,1.5258697775,5.1048365434,0.6510156151  
C,0,2.0619271405,4.0814567187,-0.3693633516  
H,0,0.6603882422,2.5901930419,-1.1567794872  
H,0,3.1233265873,3.9025409355,-0.1711472238  
H,0,1.9976872893,4.4731802645,-1.3883469461  
C,0,0.8321051717,3.2280742302,2.1754975335  
H,0,-0.0062093702,3.3265000075,2.8666981814  
H,0,1.4113171013,2.3534413463,2.473339854  
C,0,1.6835492416,4.5134401374,2.0649282438  
H,0,1.3641873351,5.2399552392,2.8190785695  
H,0,2.7374513419,4.2887537948,2.2599331361  
H,0,2.0932678675,6.0368823814,0.5709298741  
C,0,0.0170394182,5.3955474478,0.412244321  
H,0,-0.3346719458,6.0032101618,1.2545839348  
C,0,-0.7315111139,4.0349272882,0.4320678376  
H,0,-1.5648162333,4.0028200142,1.1347203108  
H,0,-1.1205603366,3.7512633322,-0.5480885148  
N,0,0.2226529024,2.9321517679,0.830142813  
C,0,-0.2557567755,6.1618718051,-0.8560223005  
H,0,-0.017039598,5.6526375915,-1.7909476629  
C,0,-0.7604540166,7.3950352241,-0.9007056062  
H,0,-0.9294111098,7.9077852861,-1.8443752691  
H,0,-1.0273651963,7.9405346199,0.0029550766  
C,0,2.1414357518,1.5009119621,-0.0375861424  
H,0,2.8429804627,1.6839744782,0.7749245325  
C,0,2.919292559,1.2166872169,-1.3315462986  
C,0,4.3306309022,1.4377425758,-1.4614771031  
C,0,2.2341135198,0.7478275759,-2.4345211765  
C,0,5.1719553915,1.9020490655,-0.4217304215

C,0,4.9183772753,1.1633724567,-2.7455314833  
C,0,2.9187046512,0.50328172,-3.6473578391  
H,0,1.1635574481,0.5663482198,-2.3891595373  
C,0,6.5267680659,2.1012264943,-0.6290018164  
H,0,4.7893187837,2.0785170945,0.5760130853  
C,0,6.3084357156,1.3751829233,-2.9221761294  
H,0,2.363553129,0.1325464367,-4.5082583354  
C,0,7.102990525,1.836062975,-1.8981953814  
H,0,6.7271475016,1.1591708063,-3.9003553719  
H,0,8.1629126188,1.9868825642,-2.0670261429  
N,0,1.3157484652,0.3767409192,0.3900897884  
O,0,7.2374102584,2.5546215995,0.4421476429  
C,0,8.6469089923,2.7001802146,0.3143093849  
H,0,9.0010583938,3.0323133497,1.2926105116  
H,0,9.1326578146,1.7488325164,0.0625790113  
H,0,8.9125149304,3.4566407903,-0.4356190657  
N,0,4.2089607922,0.7036908346,-3.8166622166  
H,0,0.507092624,0.1373899113,-0.1958957907  
C,0,1.7646539136,-0.6207740572,1.2146799589  
N,0,0.8525116416,-1.6060224513,1.4108269285  
H,0,-0.0488554832,-1.489627935,0.9485690941  
S,0,3.3060289086,-0.5960536021,1.9385954587  
O,0,-2.9466073354,-0.55783771,1.4381252473  
O,0,-1.8286779258,1.3766371935,1.784813265  
O,0,-5.9295340119,2.8668907894,0.9086876307  
O,0,-3.8891087521,3.6732408074,1.4629293731  
C,0,-4.6172024938,2.7213880232,1.2259279902  
C,0,-2.8881358835,0.8196386264,1.5079816065  
C,0,-4.2309686442,1.311012544,1.2423333639  
C,0,-5.0330281257,0.2062697207,1.0140930702  
C,0,-4.2180574877,-0.9485672005,1.0030240458  
C,0,-4.6209896962,-2.3398717144,1.4068481599  
C,0,-6.4261305761,4.2225190239,0.8616525285  
C,0,-7.9087699359,4.1569812844,0.5543750974  
H,0,-6.089815863,0.2132544587,0.7843113436  
H,0,-3.816088498,-3.0347895042,1.1409339594  
H,0,-6.2322409703,4.7091742274,1.823045797  
H,0,-5.8764913177,4.7762376594,0.0926351356  
H,0,-8.0924471101,3.664031272,-0.4063814507  
H,0,-8.3200032483,5.1714323525,0.5015266936  
H,0,-8.4493929089,3.6087657575,1.3333255459  
H,0,-5.4996855754,-2.6242485514,0.8170306474  
C,0,-3.7907026802,-1.1007652705,-1.1056658558

H,0,-3.1661798363,-1.9657880536,-0.9017163677  
C,0,-3.0730394955,0.0638628644,-1.4349453041  
H,0,-3.5156981066,0.9663318758,-1.8284431051  
C,0,-5.0796029968,-1.4059138871,-1.7682589291  
C,0,-5.4190360239,-2.7468521557,-2.01999681  
C,0,-5.9805451882,-0.4057656943,-2.1795574443  
C,0,-6.6117959043,-3.0791465492,-2.6631234879  
H,0,-4.731583621,-3.5335545051,-1.7197888295  
C,0,-7.1708758132,-0.737885245,-2.8210384943  
H,0,-5.7552327401,0.6391053936,-1.9855721007  
C,0,-7.4930425838,-2.0761037852,-3.0669168297  
H,0,-6.8484823213,-4.1230987729,-2.8512606187  
H,0,-7.8517547768,0.0507316262,-3.1308750534  
H,0,-8.4222762365,-2.3315984339,-3.5689882053  
N,0,-1.7246081263,0.1630985884,-1.2548412498  
O,0,-1.0214347734,-0.8349498259,-0.8915546747  
O,0,-1.1591446177,1.2789236927,-1.4830543787  
H,0,-0.3553734586,2.0766365485,0.9265409393  
C,0,1.0914792684,-2.9148206842,2.0336865155  
H,0,2.167000549,-2.9862477542,2.1871554821  
C,0,0.4351561073,-3.0791746892,3.4496679668  
C,0,-1.0638376248,-2.7299630672,3.4696964043  
H,0,-1.2391991574,-1.6979311951,3.1493406684  
H,0,-1.6355422573,-3.3949584333,2.8214233767  
H,0,-1.4455016815,-2.8246238428,4.4946810384  
C,0,1.1607356786,-2.1423049854,4.4358117766  
H,0,2.2285686338,-2.3745392076,4.5122649656  
H,0,1.0721567016,-1.0927196208,4.1395864268  
H,0,0.7199370139,-2.2461423266,5.4355800768  
C,0,0.6380356712,-4.5315489256,3.9254024273  
H,0,1.7004575138,-4.8056345917,3.9443270922  
H,0,0.255856783,-4.6468904398,4.947241811  
H,0,0.1068515804,-5.2449953458,3.2886661522  
C,0,0.6171042575,-3.9597054463,0.986117553  
O,0,-0.5505320932,-4.3636975115,0.9927923154  
N,0,1.4865811866,-4.3706783699,0.0116955862  
C,0,0.9339962081,-5.2704334911,-1.0164509601  
H,0,1.7802938134,-5.7449059775,-1.5243213709  
H,0,0.3670352006,-6.0573705558,-0.5104370807  
C,0,2.8975442547,-3.9855952659,-0.1346578015  
H,0,3.0508545652,-3.6967907103,-1.1806190738  
H,0,3.1033044646,-3.0925412557,0.4574396193  
C,0,0.0229085759,-4.588007086,-2.0589722456

H,0,-0.7966601789,-4.1141331231,-1.5080909082  
C,0,-0.5731291815,-5.6593183126,-2.9822184384  
H,0,-1.1354261331,-6.4129910881,-2.4169649623  
H,0,-1.2590677491,-5.2109610889,-3.7109377839  
H,0,0.2102371605,-6.1826524863,-3.5477643853  
C,0,0.7436789087,-3.5019908377,-2.8667034518  
H,0,1.1247452503,-2.7019777909,-2.2236372077  
H,0,1.5856122353,-3.9163993066,-3.4386761434  
H,0,0.0561878639,-3.0377968561,-3.58427849  
C,0,3.9128636114,-5.0914798293,0.2300421119  
H,0,3.675999784,-5.9831645175,-0.3686824276  
C,0,5.323568202,-4.6269857713,-0.1580337561  
H,0,5.6086441832,-3.7208865609,0.3916319144  
H,0,6.0667373478,-5.4007367367,0.0685340042  
H,0,5.3941486511,-4.4011966236,-1.2292585075  
C,0,3.8456014684,-5.4886836526,1.7083402869  
H,0,2.841450153,-5.8239557951,1.9900618843  
H,0,4.5384676176,-6.3119704701,1.9212632498  
H,0,4.1228825102,-4.6488624003,2.3585302146  
C,0,-4.9400883877,-2.4736693183,2.9045850654  
H,0,-5.1890728346,-3.5129240678,3.149512828  
H,0,-4.0850203866,-2.1789280579,3.5211387448  
H,0,-5.7936799127,-1.8460032987,3.185996803

-----

**dr1-TS-CCAtack-Pap**

E(RB3LYP)= -3353.33698798 Hartree

Sum of electronic and thermal Free Energies= -3352.245816 Hartree

C,0,-0.3698233758,2.6429519519,1.1144217893  
C,0,0.009171668,4.989109585,0.2250969897  
C,0,-0.9013520265,4.1031877166,1.0972017087  
H,0,0.0548428149,2.3935436757,2.0847121966  
H,0,-1.9181698947,4.1334228635,0.6920619323  
H,0,-0.962616717,4.4875676661,2.1191889238  
C,0,0.4925324201,2.9945450498,-1.2336614738  
H,0,1.4208320071,2.8576467862,-1.7904509858  
H,0,-0.2427029337,2.2849129849,-1.6184636138  
C,0,-0.0196861645,4.452274825,-1.2196508951  
H,0,0.6027862636,5.0778464665,-1.8681633891  
H,0,-1.0414324632,4.4978859526,-1.6119211921  
H,0,-0.3508782611,6.0223073226,0.2486496779  
C,0,1.4764884535,4.9416764372,0.7336796372  
H,0,2.0901231677,5.4880606584,0.0076447958  
C,0,1.9208217249,3.4532732094,0.7375541179

H,0,2.7957006357,3.2698759108,0.1123637222  
H,0,2.1250505373,3.0712093856,1.7393178412  
N,0,0.8203060097,2.578003588,0.1782644116  
C,0,1.672180378,5.5873043509,2.0812432048  
H,0,1.1867363005,5.1009856108,2.9287566965  
C,0,2.3919679907,6.6894206739,2.2939479527  
H,0,2.4970995526,7.1188205891,3.2872233777  
H,0,2.9067393782,7.2051522179,1.4850183421  
C,0,-1.4692833836,1.6071663655,0.7752836794  
H,0,-1.9664972243,1.9072071527,-0.1447698674  
C,0,-2.4789589527,1.5756099855,1.9307362447  
C,0,-3.8326267385,2.0301429332,1.7913772319  
C,0,-2.0804927669,1.100121518,3.1639908469  
C,0,-4.395145154,2.5210916775,0.5887318686  
C,0,-4.6613027035,1.982802209,2.9664574118  
C,0,-2.9888624144,1.0825692438,4.2478763058  
H,0,-1.071182136,0.7287692761,3.3205283095  
C,0,-5.707395933,2.962512925,0.5384948586  
H,0,-3.8288349579,2.5335468077,-0.3349761749  
C,0,-5.9989060596,2.4424870805,2.8793625945  
H,0,-2.6594818161,0.7022464746,5.2141072424  
C,0,-6.5197292483,2.9265310939,1.7014488582  
H,0,-6.6033350836,2.3973836685,3.7801794794  
H,0,-7.5476629148,3.2693838054,1.6698432161  
N,0,-0.9246407215,0.2807599274,0.5017622121  
O,0,-6.1406158251,3.4146840122,-0.6712309881  
C,0,-7.4871745918,3.8563943818,-0.7945496326  
H,0,-7.6067597099,4.154349883,-1.838304987  
H,0,-8.2010363045,3.0542156004,-0.5681418362  
H,0,-7.6916770569,4.7217964427,-0.1508919705  
N,0,-4.2309011959,1.5131077465,4.1733237695  
H,0,-0.4207905747,-0.1732557803,1.2655351539  
C,0,-1.3423908693,-0.5099318094,-0.5343667787  
N,0,-1.0151784736,-1.8149996933,-0.3874233495  
H,0,-0.6200397752,-2.0898113284,0.512354579  
S,0,-2.1665783287,0.1135503951,-1.8951103107  
O,0,3.6337275288,0.1622150828,2.2214205435  
O,0,1.425121143,0.5851761589,2.4268283884  
O,0,1.3841847833,-3.7497560224,3.0630767141  
O,0,-0.0020145328,-2.0810581051,2.4218764145  
C,0,1.1336902278,-2.4887411917,2.6756889369  
C,0,2.3336363472,-0.2361066154,2.4088059702  
C,0,2.3414070924,-1.6815578913,2.5802611855

C,0,3.6583434105,-2.0902018537,2.4967431697  
C,0,4.4677728063,-0.9751459475,2.1403563625  
C,0,5.8611622091,-0.7142417627,2.6515801556  
C,0,0.2414509478,-4.646951651,3.1365978282  
C,0,0.7461431239,-5.9827080939,3.6414915043  
H,0,4.0246897392,-3.1055657178,2.5806999561  
H,0,6.3170795925,0.0765421142,2.0420049832  
H,0,-0.4972979628,-4.2089629684,3.8150515749  
H,0,-0.20759596,-4.7275513932,2.1430261201  
H,0,1.4894897589,-6.4091617468,2.9593578844  
H,0,-0.092788055,-6.6844218796,3.7100413596  
H,0,1.1981439825,-5.8893921469,4.6349443323  
H,0,6.4570143848,-1.6192522531,2.4965002991  
C,0,4.6162373874,-1.2346377828,0.0810661078  
H,0,3.6253390324,-1.6670533962,-0.0094671927  
C,0,4.7085432099,0.0520433532,-0.5013980075  
H,0,5.6303115523,0.5454983008,-0.7699450755  
C,0,5.7205221468,-2.2112180082,-0.1120810094  
C,0,5.4260667519,-3.5862238079,-0.1045856293  
C,0,7.0568291117,-1.8229754807,-0.3157576806  
C,0,6.4250633918,-4.53870828,-0.2975859258  
H,0,4.3976721079,-3.9076021014,0.0429974278  
C,0,8.0574120996,-2.7752282227,-0.5049171948  
H,0,7.3213209624,-0.7700172413,-0.3301196148  
C,0,7.7475276295,-4.1367376038,-0.496627857  
H,0,6.1693377145,-5.5951052774,-0.2969414664  
H,0,9.0828322562,-2.4510212449,-0.6626729932  
H,0,8.5288293248,-4.8767778633,-0.6477190263  
N,0,3.6005753442,0.7944284188,-0.7787683739  
O,0,2.4301279486,0.356296515,-0.4950370422  
O,0,3.7441060177,1.9207365328,-1.3451790398  
H,0,1.2202509207,1.6151468473,0.1230889476  
C,0,-1.1850943004,-2.888206451,-1.3713434028  
H,0,-1.7979280938,-2.4751488996,-2.1701054414  
C,0,0.1694334775,-3.3284844754,-2.0355242378  
C,0,1.260584349,-3.6974553181,-1.0119692402  
H,0,1.4778106761,-2.8510294772,-0.3503008243  
H,0,0.9750309739,-4.5565132382,-0.4033194614  
H,0,2.1892664388,-3.9363786301,-1.5456082515  
C,0,0.6937806874,-2.1519145849,-2.884791347  
H,0,-0.0365945522,-1.8336619191,-3.6369036579  
H,0,0.9503991227,-1.283484197,-2.269312899  
H,0,1.6063095432,-2.4568871836,-3.412504429

C,0,-0.0977244265,-4.5272701025,-2.9659463646  
 H,0,-0.8395231858,-4.2816610792,-3.7359535874  
 H,0,0.8258614426,-4.8108364647,-3.4850797314  
 H,0,-0.4492972553,-5.4030859787,-2.4119765556  
 C,0,-1.9382231368,-4.0328255347,-0.6399535173  
 O,0,-1.3033137195,-4.8838218499,-0.0025578273  
 N,0,-3.3039857179,-4.0672900066,-0.6646852628  
 C,0,-3.9504240586,-5.1486949896,0.1013534266  
 H,0,-4.9791671563,-5.2314879574,-0.2642675754  
 H,0,-3.4389701974,-6.0861369746,-0.1358096382  
 C,0,-4.1993645481,-3.1080058428,-1.3292866907  
 H,0,-4.9466846204,-2.7954109483,-0.5911300714  
 H,0,-3.6449114654,-2.2067347441,-1.5940077666  
 C,0,-3.9665188273,-4.963546655,1.6337185216  
 H,0,-2.9229514758,-4.9519469574,1.9678297612  
 C,0,-4.6609168293,-6.1745233305,2.2720992918  
 H,0,-4.17346971,-7.1161932155,1.9902922299  
 H,0,-4.6428018109,-6.106327315,3.366329123  
 H,0,-5.713758493,-6.2390850364,1.9649743285  
 C,0,-4.6249755373,-3.6517700227,2.077651463  
 H,0,-4.1068591612,-2.7776084796,1.6687622131  
 H,0,-5.67823255,-3.6022379638,1.7694025856  
 H,0,-4.6017115469,-3.5599355621,3.1704909877  
 C,0,-4.9326507369,-3.6521909526,-2.5752637023  
 H,0,-5.5026471587,-4.5444553362,-2.2775105566  
 C,0,-5.9355103827,-2.5966464677,-3.0613072939  
 H,0,-5.4229304323,-1.6758291276,-3.3668369935  
 H,0,-6.5046521992,-2.9634743068,-3.9236687529  
 H,0,-6.6546667476,-2.3306024798,-2.2766918858  
 C,0,-3.9719012419,-4.062934972,-3.695808047  
 H,0,-3.2617190995,-4.8255921753,-3.3583948746  
 H,0,-4.5238816274,-4.4809066546,-4.5465008198  
 H,0,-3.401227617,-3.2014419875,-4.06599552  
 C,0,5.9080386359,-0.3071093477,4.1320379523  
 H,0,6.9421472264,-0.1138545438,4.4408616307  
 H,0,5.3277563388,0.6038303472,4.3115375596  
 H,0,5.5059322178,-1.0968256563,4.7772800802

-----

**dr1-TS-CCAttack-Tak**

E(RB3LYP)= -3353.33595263 Hartree

Sum of electronic and thermal Free Energies= -3352.248685 Hartree

C,0,-0.2462255647,2.7542638469,0.347185632

C,0,0.2627323517,4.9662910738,-0.785594695

C,0,-0.5260786683,4.2821677268,0.3480591851  
H,0,0.2697056214,2.4426982039,1.2566978632  
H,0,-1.5934608176,4.471072959,0.202542606  
H,0,-0.2651615131,4.7088859907,1.3206023445  
C,0,0.2585601937,2.8324806445,-2.1234902552  
H,0,1.0795001354,2.6055890599,-2.8040930855  
H,0,-0.5698947517,2.1617828053,-2.3574151517  
C,0,-0.1453575938,4.3242934733,-2.1267836274  
H,0,0.3431875003,4.8400367042,-2.9597301301  
H,0,-1.2257544803,4.425776878,-2.2754893489  
H,0,0.0350063598,6.0365391067,-0.797118441  
C,0,1.7900075515,4.760517969,-0.5942077366  
H,0,2.2877059944,5.1152382474,-1.5043973365  
C,0,2.0401360719,3.2344244711,-0.457628399  
H,0,2.7908559163,2.8698615334,-1.1595837106  
H,0,2.3404834535,2.9472353884,0.5522247119  
N,0,0.7659219462,2.4737233429,-0.7486048276  
C,0,2.3639870477,5.5232773542,0.5713434407  
H,0,2.0019973774,5.2423369507,1.5617754529  
C,0,3.2691175583,6.4966855292,0.4660036488  
H,0,3.6452099314,7.0219981565,1.3404296401  
H,0,3.6707434487,6.8065974278,-0.4972444439  
C,0,-1.5236478492,1.8875671696,0.1948746459  
H,0,-2.0992270442,2.2262982552,-0.6649771758  
C,0,-2.3657159364,2.0273189637,1.4723024195  
C,0,-3.5887126819,2.7764983563,1.5201048798  
C,0,-1.9302232285,1.4284866308,2.6374751258  
C,0,-4.1796300258,3.4248163269,0.4086428448  
C,0,-4.2471925064,2.8712598944,2.7956358051  
C,0,-2.669513212,1.5751391431,3.8341275321  
H,0,-1.0265525684,0.8247794579,2.6534076423  
C,0,-5.3518062338,4.15143307,0.5401280007  
H,0,-3.7501182151,3.3512330407,-0.5834600576  
C,0,-5.4462344657,3.6201089922,2.8941554451  
H,0,-2.3122384919,1.0952924458,4.7444449623  
C,0,-5.9928874407,4.2532650378,1.8018459459  
H,0,-5.9221914836,3.6757891616,3.8684565919  
H,0,-6.9126760282,4.8163057739,1.9115201619  
N,0,-1.1687069687,0.5033098914,-0.0791161862  
O,0,-5.8222131536,4.7361186707,-0.5964329565  
C,0,-7.0056487021,5.523266288,-0.526682489  
H,0,-7.1691652275,5.9012977692,-1.5380274787  
H,0,-7.8753695731,4.9259740563,-0.2243299507



H,0,-6.8885108612,6.3731628463,0.1580106306  
N,0,-3.7805202939,2.2746554297,3.9303146762  
H,0,-0.5842143813,0.0255649685,0.6218855291  
C,0,-1.8151281506,-0.3016290646,-0.9726890787  
N,0,-1.4872954964,-1.6101127729,-0.8452678739  
H,0,-0.8390839205,-1.8482114907,-0.0950128239  
S,0,-2.8919340254,0.3026863385,-2.1534318589  
O,0,3.1485464745,-1.3927646652,-0.9511490185  
O,0,2.3420905723,0.46812658,-1.9477514317  
O,0,6.6577170997,1.476533188,-1.589036167  
O,0,4.7187760575,2.4233312483,-2.2770548609  
C,0,5.3138847715,1.4727563799,-1.7873551182  
C,0,3.3075590156,-0.1283750341,-1.4913519166  
C,0,4.714565739,0.2179828318,-1.3485649714  
C,0,5.3262136192,-0.8411989964,-0.6972043817  
C,0,4.3489774921,-1.8070848797,-0.3626654603  
C,0,4.5462847079,-3.2974340449,-0.3479184531  
C,0,7.3560745209,2.6776346357,-1.9838088712  
C,0,8.8282709594,2.4691631495,-1.6893156292  
H,0,6.3739519143,-0.9176689116,-0.4370224945  
H,0,3.7049914126,-3.7649585401,0.1789649978  
H,0,7.1781028667,2.860722305,-3.0485905021  
H,0,6.9472380058,3.5282813072,-1.4279625291  
H,0,8.9960404056,2.2832269847,-0.6228587594  
H,0,9.3922731503,3.3648650902,-1.9734541583  
H,0,9.2273931753,1.6204150239,-2.2548947638  
H,0,5.4496346059,-3.5171405121,0.2306996792  
C,0,3.9231318366,-1.276217575,1.7196662683  
H,0,4.0905222922,-0.221130068,1.5323177853  
C,0,2.567053183,-1.6197197164,1.8755506238  
H,0,2.2039899208,-2.5823830701,2.2025734639  
C,0,4.9858911371,-1.9455483674,2.4977350456  
C,0,6.213536926,-1.2822809126,2.682190544  
C,0,4.825922172,-3.2152894362,3.0832076041  
C,0,7.2418381831,-1.8614495359,3.4212451476  
H,0,6.3532343629,-0.2966443313,2.244360981  
C,0,5.8572465248,-3.7971169283,3.8186817245  
H,0,3.8896189768,-3.7533208851,2.972305769  
C,0,7.0691528018,-3.1253636539,3.9910783648  
H,0,8.177503434,-1.3250182724,3.5557684318  
H,0,5.7107440614,-4.7780889434,4.2630734789  
H,0,7.8700366507,-3.5806149212,4.5673222126  
N,0,1.5724014904,-0.7592828491,1.5297300714

O,0,1.8078590432,0.4236428648,1.134419484  
O,0,0.3563842888,-1.1582654771,1.6547741562  
H,0,1.016629821,1.4702713156,-0.7429610349  
C,0,-2.003309524,-2.738370454,-1.6265295883  
H,0,-2.7610437374,-2.3250962895,-2.2885613344  
C,0,-0.9090165105,-3.3918072466,-2.5439842912  
C,0,0.3849950107,-3.7469929365,-1.7864078683  
H,0,0.8805348529,-2.8540259319,-1.3903646422  
H,0,0.1904441626,-4.4360837631,-0.9630266964  
H,0,1.0908508983,-4.221500191,-2.4801094536  
C,0,-0.5577481363,-2.3869810341,-3.6593509407  
H,0,-1.4340134889,-2.1187943354,-4.2612891398  
H,0,-0.130643956,-1.463863676,-3.255551426  
H,0,0.1890201109,-2.8253376249,-4.3333491109  
C,0,-1.4916694959,-4.6626284562,-3.1917537225  
H,0,-2.4062918723,-4.4471748598,-3.7576350289  
H,0,-0.767185823,-5.0885637998,-3.8966175978  
H,0,-1.7180948915,-5.4302971768,-2.4455079869  
C,0,-2.6357922549,-3.7148740173,-0.5970541196  
O,0,-1.91789816,-4.5257019417,-0.0018838001  
N,0,-3.9714250272,-3.6292889368,-0.3070404727  
C,0,-4.4678727518,-4.5282374049,0.7511603388  
H,0,-5.559707022,-4.5481925498,0.6713045069  
H,0,-4.1024540026,-5.5380769103,0.5419675998  
C,0,-4.9522566288,-2.7023554187,-0.8913399203  
H,0,-5.4797298423,-2.2184114867,-0.0611767436  
H,0,-4.4361746402,-1.9014207417,-1.4227557774  
C,0,-4.0667499057,-4.1416759877,2.1903709123  
H,0,-2.973032381,-4.1758403185,2.2382522126  
C,0,-4.62224752,-5.1929798958,3.1610299122  
H,0,-4.2703681741,-6.2010795154,2.9091757101  
H,0,-4.3097462174,-4.9803706685,4.1903225472  
H,0,-5.72098685,-5.2098367494,3.148175821  
C,0,-4.5229054975,-2.7314745859,2.5844779764  
H,0,-4.0912203645,-1.9650656827,1.9312906672  
H,0,-5.6168120031,-2.633828691,2.5496962312  
H,0,-4.2076656076,-2.4977563693,3.6088215721  
C,0,-5.9949922059,-3.3547629239,-1.8254099209  
H,0,-6.5112062539,-4.1484690599,-1.265469958  
C,0,-7.0412440137,-2.301541044,-2.2171825007  
H,0,-6.5821231445,-1.4760789606,-2.7760934085  
H,0,-7.8208348822,-2.7395210335,-2.8518221144  
H,0,-7.53278143,-1.8716158045,-1.3355476567

C,0,-5.3591405545,-3.9938285913,-3.0639857986  
H,0,-4.6212453806,-4.7545718701,-2.7884361506  
H,0,-6.1202911829,-4.4820781211,-3.684721366  
H,0,-4.8596424764,-3.2410514344,-3.6875770937  
C,0,4.6665899712,-3.9098468482,-1.7529965053  
H,0,4.7905857235,-4.9970762473,-1.6846510512  
H,0,3.7708137076,-3.7097559457,-2.3494540703  
H,0,5.530957796,-3.5045033387,-2.2916083084

-----

**ee-TS-CCAttack-Pap**

E(RB3LYP)= -3353.32782763 Hartree

Sum of electronic and thermal Free Energies= -3352.239720 Hartree

C,0,0.0729063127,-2.5141046958,-0.1926757531  
C,0,0.0425369427,-4.8560675204,-1.1655470342  
C,0,0.4029787842,-4.0089056754,0.0702001848  
H,0,-0.7137107505,-2.1600488539,0.4775427724  
H,0,1.4694859103,-4.1272381653,0.2844951467  
H,0,-0.1331783986,-4.3586540177,0.9568785828  
C,0,0.3738621699,-2.870334305,-2.6755971103  
H,0,-0.2002019393,-2.7830487701,-3.5998420354  
H,0,1.1984030387,-2.1566266438,-2.7276088347  
C,0,0.8281275984,-4.3169770937,-2.3776993258  
H,0,0.6587606813,-4.9494554707,-3.2551271302  
H,0,1.9021310191,-4.3427253597,-2.1654286096  
H,0,0.3040098409,-5.9027531525,-0.9841728302  
C,0,-1.4755985065,-4.7499301295,-1.483371496  
H,0,-1.6403748302,-5.2221796594,-2.4591082853  
C,0,-1.819424962,-3.2401410375,-1.5937749699  
H,0,-2.3409947063,-2.9833082849,-2.5155392112  
H,0,-2.4215399377,-2.8905521222,-0.7513788106  
N,0,-0.553535607,-2.4187352379,-1.574123925  
C,0,-2.3566500291,-5.4447002734,-0.47785557  
H,0,-2.3400204813,-5.0461747651,0.5378893471  
C,0,-3.1341138669,-6.4926209545,-0.7520424826  
H,0,-3.7435616109,-6.9661521419,0.0135808498  
H,0,-3.1910340448,-6.9216244464,-1.7510942579  
C,0,1.2933470063,-1.5743950965,-0.0585434616  
H,0,2.1021029076,-1.9281388306,-0.695226517  
C,0,1.7591870409,-1.559507017,1.4037032147  
C,0,3.0162384304,-2.114532164,1.8177396292  
C,0,0.9451276512,-1.0076153307,2.3718730391  
C,0,3.9646489338,-2.6974118149,0.9428802475  
C,0,3.315430142,-2.0753623096,3.2241001334

C,0,1.3504893234,-1.0101360178,3.7271989251  
H,0,-0.0164847445,-0.5715693963,2.1159980668  
C,0,5.1493783155,-3.2321893439,1.4223093067  
H,0,3.8128190509,-2.7057638642,-0.1299321818  
C,0,4.536026245,-2.6322191616,3.6801822387  
H,0,0.6966715734,-0.5710461114,4.4797292442  
C,0,5.4372985447,-3.2031939284,2.8114403718  
H,0,4.7368073882,-2.5914031119,4.7464158651  
H,0,6.3625496627,-3.618891487,3.1937424557  
N,0,0.9477985968,-0.2467380502,-0.5444000721  
O,0,5.9857584947,-3.7671335954,0.4892604941  
C,0,7.2426446171,-4.2815563708,0.91334626  
H,0,7.7466893054,-4.6198969419,0.0055004784  
H,0,7.8562001283,-3.5096217575,1.3947483903  
H,0,7.1250253516,-5.1345066751,1.5942813098  
N,0,2.4826223679,-1.5276471335,4.1558961688  
H,0,0.1525594649,0.2113839759,-0.092162528  
C,0,1.7897097152,0.5577494028,-1.2644517702  
N,0,1.4007558863,1.850868949,-1.3075361302  
H,0,0.5439036096,2.0928671463,-0.8094078403  
S,0,3.170835312,-0.0593757006,-2.0613445473  
O,0,-2.9757565727,2.5697445016,-0.4735126608  
O,0,-1.2379136163,1.3317005052,0.2543190745  
O,0,-4.6658865973,-0.874572213,2.0165489301  
O,0,-2.4605767089,-1.178218049,1.6174342615  
C,0,-3.4732811565,-0.497534113,1.4975571214  
C,0,-2.455634736,1.491631461,0.1903350867  
C,0,-3.5757063669,0.7704125297,0.7831927112  
C,0,-4.7204632887,1.4827195459,0.4827895073  
C,0,-4.3820661367,2.5030572576,-0.4439491147  
C,0,-5.0453794828,3.8520282301,-0.5574738762  
C,0,-4.6878880219,-2.123845159,2.7433584883  
C,0,-6.1152212896,-2.3687971699,3.1898051444  
H,0,-5.7302089697,1.2322719017,0.7774182449  
H,0,-4.7123841691,4.3360544225,-1.4837411304  
H,0,-4.323945889,-2.9244056509,2.0904137912  
H,0,-4.0027195042,-2.0515612465,3.59448644  
H,0,-6.4708248465,-1.5605579821,3.8374031697  
H,0,-6.1689016083,-3.3070968274,3.7532717832  
H,0,-6.7910105763,-2.4462564007,2.3311874153  
H,0,-6.12540097,3.6930438933,-0.6502760793  
C,0,-4.7268087585,1.530528797,-2.2213738076  
H,0,-4.3784653728,2.3887892586,-2.7912128671

C,0,-3.84565999,0.4277150955,-2.3075521234  
H,0,-4.0980114739,-0.5804059009,-2.0173617814  
C,0,-6.1971485079,1.3075799401,-2.3052039039  
C,0,-6.9903143764,2.2303185789,-3.0078018005  
C,0,-6.8345610168,0.1949106369,-1.7274269014  
C,0,-8.3686148297,2.0504265446,-3.1318677257  
H,0,-6.5168081981,3.0909852754,-3.4733893558  
C,0,-8.2105963393,0.0143765846,-1.8506433185  
H,0,-6.252660329,-0.5331303524,-1.1687571069  
C,0,-8.9855683257,0.9412925508,-2.5532594617  
H,0,-8.9578903884,2.7773235342,-3.684870178  
H,0,-8.6810376651,-0.8535592674,-1.3954744948  
H,0,-10.0585083972,0.797869025,-2.6482954494  
N,0,-2.5963733173,0.549908488,-2.8646655438  
O,0,-2.1924829499,1.6316703653,-3.3412120821  
O,0,-1.8627711752,-0.5014162035,-2.9284562624  
H,0,-0.8419401624,-1.4401672482,-1.7895408045  
C,0,2.1062889711,2.9606357047,-1.9596867219  
H,0,2.9977236091,2.5243313066,-2.4046691123  
C,0,1.2872241137,3.5957194183,-3.1386497311  
C,0,-0.0966950565,4.1357119536,-2.7285508183  
H,0,-0.7264827185,3.362637784,-2.2794557371  
H,0,-0.0141450169,4.9685297927,-2.0293270447  
H,0,-0.6236991857,4.4807484921,-3.6274599683  
C,0,1.0872263853,2.5080648966,-4.2147533277  
H,0,2.0388419957,2.0602265616,-4.5253486114  
H,0,0.4215679813,1.7125265768,-3.8674117651  
H,0,0.618969374,2.9513447137,-5.1024353872  
C,0,2.1186219229,4.7450831782,-3.7397644587  
H,0,3.0895672603,4.3968677646,-4.1124897037  
H,0,1.5833805249,5.1878942761,-4.588503853  
H,0,2.2935137802,5.5450958168,-3.0116362385  
C,0,2.4750942243,3.9596921835,-0.8282875996  
O,0,1.6147484218,4.7355224139,-0.4013800566  
N,0,3.725542053,3.9406809063,-0.2641506972  
C,0,3.9375813001,4.8693380618,0.8620341834  
H,0,5.018705201,4.9569249808,1.0108109167  
H,0,3.5634845635,5.8536730138,0.5660657073  
C,0,4.842154281,3.0395326526,-0.5863098669  
H,0,5.1665099091,2.5727734387,0.3512608009  
H,0,4.4864550211,2.222479141,-1.2152172785  
C,0,3.2690485921,4.4664772667,2.193880772  
H,0,2.1901018305,4.4239143011,2.0103801401

C,0,3.5339803299,5.5632044888,3.2343045627  
H,0,3.1752160736,6.5409383314,2.8893404322  
H,0,3.0257331268,5.3387194612,4.1796563458  
H,0,4.6067556257,5.6585556159,3.4525885139  
C,0,3.7265792945,3.0968803048,2.7095780175  
H,0,3.4957493982,2.2951468895,1.999619545  
H,0,4.8074940561,3.0782314751,2.9061959611  
H,0,3.2203813387,2.8496338691,3.650854892  
C,0,6.0652281202,3.7121366925,-1.2480099558  
H,0,6.3892922437,4.5462726292,-0.6088901531  
C,0,7.2179331498,2.6997417178,-1.3108437102  
H,0,6.9489485624,1.8276085069,-1.9205915383  
H,0,8.1129121768,3.151586905,-1.7548022587  
H,0,7.4897132375,2.3346930424,-0.3126613167  
C,0,5.7512064472,4.2809881702,-2.6348748637  
H,0,4.9375139561,5.0122685699,-2.5962293329  
H,0,6.6291247724,4.786670111,-3.0555993087  
H,0,5.4634618706,3.4855323269,-3.334632761  
C,0,-4.7502478136,4.7777112682,0.6324913563  
H,0,-3.6748490929,4.955413236,0.7351404948  
H,0,-5.2401493468,5.7484707219,0.492784111  
H,0,-5.1145156225,4.3473934237,1.5726431425

-----

**ee-TS-CCAttack-Tak**

E(RB3LYP)= -3353.33486421 Hartree

Sum of electronic and thermal Free Energies= -3352.247608 Hartree

C,0,1.4509930501,2.6471573275,-0.4085281142  
C,0,2.3725234135,4.8067187595,0.553878078  
C,0,2.457558893,3.8116162821,-0.6195891531  
H,0,0.7012312113,2.6134078155,-1.2018558767  
H,0,3.4767580102,3.4189237602,-0.6813545933  
H,0,2.259508903,4.3105816848,-1.5725063045  
C,0,1.4885702173,3.0150769284,2.0862654552  
H,0,0.8122051535,3.2935071585,2.8970771232  
H,0,1.8538592819,2.006562526,2.2874047192  
C,0,2.6227202435,4.0421525084,1.8688840423  
H,0,2.6629921262,4.7375689222,2.7136612753  
H,0,3.5919567185,3.5341165012,1.8257775593  
H,0,3.1234820472,5.5921867164,0.42720386  
C,0,0.9584486459,5.445731416,0.6284991605  
H,0,0.8938837821,5.9913245234,1.5775975188  
C,0,-0.0681869068,4.2823025785,0.6489372609  
H,0,-0.7873177141,4.3719435338,1.4641046058

H,0,-0.6303941202,4.1954913178,-0.2823232028  
N,0,0.6406956047,2.9623020083,0.8408171422  
C,0,0.6634254131,6.4176733739,-0.4839885103  
H,0,0.6454065475,6.006908439,-1.4944235304  
C,0,0.4231960425,7.7173831389,-0.3082462283  
H,0,0.2211160256,8.3776490037,-1.1478507491  
H,0,0.4177688617,8.1740462148,0.6801645467  
C,0,2.1299325282,1.2579087961,-0.3211547497  
H,0,2.8930031002,1.2722921474,0.4549830174  
C,0,2.7768927257,0.9331707786,-1.67578602  
C,0,4.199278161,0.8638809511,-1.8570484158  
C,0,1.9728662823,0.7065475027,-2.7749659272  
C,0,5.1528901393,1.053603694,-0.8275715636  
C,0,4.6752331501,0.5887264443,-3.1864478332  
C,0,2.5538560949,0.427548529,-4.0343511073  
H,0,0.889097972,0.7390263445,-2.6963238404  
C,0,6.512350359,0.9905322678,-1.0871028821  
H,0,4.8509515989,1.2145774031,0.2004010463  
C,0,6.0721825742,0.5306190053,-3.4163384649  
H,0,1.9055741203,0.2495391986,-4.8915077042  
C,0,6.9791602514,0.7293996964,-2.4010274684  
H,0,6.4038889932,0.3210439341,-4.4286635313  
H,0,8.0412374538,0.6777896315,-2.6110105396  
N,0,1.1636559497,0.2486495064,0.0850837494  
O,0,7.3352749333,1.1898440225,-0.0194527618  
C,0,8.7416082861,1.0945210119,-0.2127447539  
H,0,9.1878030484,1.26362928,0.7695833229  
H,0,9.0361470804,0.0998876367,-0.5710799104  
H,0,9.1111084815,1.8592713341,-0.9082894295  
N,0,3.8509404968,0.3756113929,-4.2526749526  
H,0,0.3682542642,0.0881079969,-0.5483098186  
C,0,1.4209698968,-0.7573221967,0.9754659049  
N,0,0.4783322265,-1.7271545211,0.9716265652  
H,0,-0.2993079137,-1.609645333,0.3235215666  
S,0,2.7809345968,-0.7509628195,2.011081735  
O,0,-2.8985997472,2.7748081671,0.080111312  
O,0,-1.6729425527,1.6679060774,1.6335309685  
O,0,-5.7780643219,0.222050743,2.5447862912  
O,0,-3.73591428,0.2839146388,3.529914761  
C,0,-4.4741027455,0.6059110374,2.6170926735  
C,0,-2.7818097632,1.9061791107,1.1504262259  
C,0,-4.122014113,1.4650511628,1.4832803675  
C,0,-4.9854091511,2.0736889771,0.5871583754

C,0,-4.2305066918,2.7986396057,-0.3579592425  
C,0,-4.6363361605,4.0705015549,-1.0501902457  
C,0,-6.2679736717,-0.5708602047,3.6472256198  
C,0,-7.7308924716,-0.8669696311,3.3818599112  
H,0,-6.0607936052,1.964056535,0.5618513096  
H,0,-3.9384043795,4.2728755087,-1.8726864874  
H,0,-5.675972843,-1.4890616409,3.7197323894  
H,0,-6.128830995,-0.0123834494,4.5791183526  
H,0,-8.3131175794,0.0578900082,3.3067549525  
H,0,-8.142999137,-1.4655479871,4.2022002096  
H,0,-7.8567360633,-1.4307169782,2.4511434074  
H,0,-5.6215084725,3.9090254552,-1.5021773641  
C,0,-4.1017049768,1.3487368302,-1.9819636877  
H,0,-3.6042568113,2.1110790559,-2.5739980449  
C,0,-3.253771329,0.3198998704,-1.5444988905  
H,0,-3.5806186277,-0.6352961341,-1.1626404548  
C,0,-5.4993872929,1.063522169,-2.3781320077  
C,0,-6.0734823772,1.7935636687,-3.433609068  
C,0,-6.2810036894,0.0730265158,-1.7543739827  
C,0,-7.3795839411,1.5434250462,-3.855830538  
H,0,-5.4815828339,2.5534139957,-3.9381699593  
C,0,-7.5847116526,-0.1752803893,-2.1755515991  
H,0,-5.8738364384,-0.4951025447,-0.9231722846  
C,0,-8.1411564312,0.5576045714,-3.2283655024  
H,0,-7.7982798651,2.1170503675,-4.6786363681  
H,0,-8.1705516188,-0.9443459841,-1.6788675074  
H,0,-9.1585553333,0.3596295823,-3.5548204577  
N,0,-1.8919070457,0.4372971022,-1.6317312032  
O,0,-1.3397040713,1.4796486958,-2.0804711564  
O,0,-1.1798352251,-0.5627926302,-1.2771839797  
H,0,-0.1203869311,2.2559123158,0.982490103  
C,0,0.4480705899,-2.9540923273,1.7732929917  
H,0,1.3736875273,-2.969210237,2.3448454011  
C,0,-0.7315558095,-2.9619653779,2.8102537051  
C,0,-2.0941293089,-2.6172000369,2.1776377334  
H,0,-2.0940493794,-1.6079620424,1.7518304594  
H,0,-2.3641951532,-3.3299248096,1.3967335403  
H,0,-2.8679533949,-2.6291313995,2.9540004727  
C,0,-0.4199991418,-1.9120531558,3.8956575019  
H,0,0.5261492257,-2.1237517644,4.4079263028  
H,0,-0.3627860183,-0.9025244546,3.4780503299  
H,0,-1.2171615002,-1.9064156858,4.6486771707  
C,0,-0.8080404787,-4.3488352414,3.4766304243



H,0,0.1379003543,-4.6170669517,3.9631540975  
H,0,-1.582328567,-4.3463924634,4.2534630114  
H,0,-1.0630418475,-5.1331092377,2.7573163426  
C,0,0.398042704,-4.1219519773,0.7492102199  
O,0,-0.6863005489,-4.4595220227,0.2629603429  
N,0,1.5573533563,-4.7255368282,0.3387565771  
C,0,1.4161487909,-5.7532521401,-0.7093611613  
H,0,2.341570151,-6.3388590242,-0.7186224885  
H,0,0.6023100507,-6.4242265825,-0.4194909137  
C,0,2.9243258591,-4.4240966792,0.7864047314  
H,0,3.5402628278,-4.2876345926,-0.1100162024  
H,0,2.9398170156,-3.4655628363,1.3068145757  
C,0,1.1353198995,-5.2118770869,-2.127166896  
H,0,0.2108117458,-4.6272920178,-2.0694042111  
C,0,0.8942089834,-6.3934488488,-3.0763755461  
H,0,0.0650956794,-7.0235828107,-2.7318234165  
H,0,0.6456886076,-6.0414348103,-4.0846764682  
H,0,1.785719007,-7.030459854,-3.1606775132  
C,0,2.2500312747,-4.3001617218,-2.6549810719  
H,0,2.3973297293,-3.4220123748,-2.016615083  
H,0,3.2080129934,-4.8332243205,-2.7303465647  
H,0,2.0023711704,-3.9306563255,-3.6576309207  
C,0,3.5784943222,-5.5066609502,1.6737537024  
H,0,3.5777261234,-6.4546679954,1.116552427  
C,0,5.0401584525,-5.1174728975,1.9354241468  
H,0,5.1045057682,-4.1643375232,2.4757180902  
H,0,5.5480884023,-5.8784595418,2.5396740322  
H,0,5.6028351458,-5.0055609874,1.0001777127  
C,0,2.8203450327,-5.732503792,2.985326498  
H,0,1.778766547,-6.0164901484,2.8028437773  
H,0,3.2842989205,-6.5366023707,3.5695718662  
H,0,2.826262979,-4.8282706768,3.6075878606  
C,0,-4.6882037975,5.2925439822,-0.1186315139  
H,0,-3.711643825,5.4831876486,0.3397664223  
H,0,-4.9774218541,6.1902519639,-0.6779588513  
H,0,-5.4162728273,5.1468603084,0.6872771686

-----

**dr2-TS-CCAtack-Pap**

E(RB3LYP)= -3353.33287147 Hartree

Sum of electronic and thermal Free Energies= -3352.243424 Hartree

C,0,0.566832394,2.3457346717,-0.1732366453  
C,0,1.3760904462,4.3698600792,-1.4795262889  
C,0,0.6054546187,3.9000948073,-0.2297693498

H,0,1.0832895201,1.9714709583,0.7114504581  
H,0,-0.4114224501,4.3020842959,-0.2683572624  
H,0,1.0597455091,4.297619768,0.6825287699  
C,0,0.8435506602,2.2240498048,-2.6737895382  
H,0,1.5439555254,1.8336569634,-3.4151400272  
H,0,-0.1062936536,1.7021311942,-2.8052573787  
C,0,0.7066088478,3.76217003,-2.7275375552  
H,0,1.1749798868,4.1488138222,-3.638679048  
H,0,-0.3492818763,4.0510941428,-2.7632448494  
H,0,1.3555390121,5.4624500556,-1.5359961632  
C,0,2.8493921036,3.8771361855,-1.4369949768  
H,0,3.2882802708,4.0644321946,-2.4245434353  
C,0,2.8113484999,2.346607334,-1.1864831693  
H,0,3.4293236768,1.777092663,-1.8809676781  
H,0,3.1315473248,2.0768867322,-0.1784537012  
N,0,1.4020667661,1.8291329953,-1.3323818066  
C,0,3.6990946185,4.5842185326,-0.4136485795  
H,0,3.4008728585,4.4639480796,0.6291438682  
C,0,4.7666841158,5.3298607733,-0.7003506903  
H,0,5.3418699968,5.8257901056,0.0775302758  
H,0,5.1101816705,5.4733529393,-1.723488106  
C,0,-0.8733420737,1.7770859841,-0.1844522195  
H,0,-1.4090914333,2.1724660527,-1.0451115468  
C,0,-1.5986276273,2.2017026922,1.1025423502  
C,0,-2.6961058683,3.1276591164,1.1034578443  
C,0,-1.1927805712,1.6824857081,2.3149859242  
C,0,-3.244192447,3.727870031,-0.0560185797  
C,0,-3.2708964303,3.459621231,2.3798122362  
C,0,-1.841590074,2.0727046463,3.5098563343  
H,0,-0.3708465666,0.9756206579,2.3743978331  
C,0,-4.2974929037,4.6237628282,0.0273530385  
H,0,-2.8887742991,3.4704849804,-1.0463723283  
C,0,-4.346458739,4.3807546878,2.4291342121  
H,0,-1.5078183077,1.6536244081,4.458468536  
C,0,-4.8542049881,4.9586950984,1.2884297762  
H,0,-4.7597914752,4.6146728761,3.4055445999  
H,0,-5.6789221547,5.6581666006,1.3617552279  
N,0,-0.8733291827,0.3286331222,-0.3603922141  
O,0,-4.7402117267,5.1382681094,-1.1544856437  
C,0,-5.8835833675,5.9850723911,-1.1473363343  
H,0,-6.0768850963,6.231007902,-2.1936660561  
H,0,-6.7625437303,5.476881309,-0.7309711239  
H,0,-5.700509248,6.9146796694,-0.5928221205

N,0,-2.8367243349,2.9329151495,3.5612480056  
H,0,-0.3563456033,-0.2303822382,0.3225689757  
C,0,-1.7816404515,-0.3393388358,-1.1364793093  
N,0,-1.8301000822,-1.6716064733,-0.9081014909  
H,0,-1.2078766386,-2.0401334937,-0.1856478  
S,0,-2.7361488063,0.4591555189,-2.3122981687  
O,0,1.6606068103,-3.6957926408,1.100774583  
O,0,0.2326492465,-1.9307781693,1.1881087849  
O,0,3.9203397281,-0.1495355269,2.8887722988  
O,0,1.8914144415,0.5058917235,2.1386802354  
C,0,2.7219282276,-0.3778389235,2.3104011214  
C,0,1.3618513971,-2.3771208184,1.3769959007  
C,0,2.5639756926,-1.7787371085,1.9385613016  
C,0,3.5455124413,-2.7408815378,1.9241557447  
C,0,3.0405798614,-3.905461911,1.2773586083  
C,0,3.3837379183,-5.3140504737,1.6908552314  
C,0,4.1997992354,1.2093183641,3.2926558451  
C,0,5.5628681796,1.2191126371,3.9543073775  
H,0,4.5679457378,-2.6214772717,2.2582028577  
H,0,2.9888012754,-6.0141315041,0.947887762  
H,0,4.1791543816,1.8552270602,2.4082751463  
H,0,3.4125757027,1.5471072572,3.9743205155  
H,0,5.578458277,0.5715692361,4.8374199513  
H,0,5.8095145346,2.2382578662,4.2727829307  
H,0,6.3395195834,0.8795035825,3.2608776152  
H,0,4.4746782657,-5.4193878325,1.6699898441  
C,0,3.8171323438,-3.4967955511,-0.6131442057  
H,0,4.6964834666,-2.9227592353,-0.3363974567  
C,0,2.813596307,-2.717153865,-1.247605229  
H,0,1.9439766106,-3.1403221076,-1.7234854137  
C,0,4.1511107573,-4.835945989,-1.1668406019  
C,0,5.4879698554,-5.2676740187,-1.1470203249  
C,0,3.1852312573,-5.6917934316,-1.7269795559  
C,0,5.8539358434,-6.5036571911,-1.6795470524  
H,0,6.2497164908,-4.6181494758,-0.7217919458  
C,0,3.5505733246,-6.9275287947,-2.2571717674  
H,0,2.1410379455,-5.3946325308,-1.7432451065  
C,0,4.8858708441,-7.3393417974,-2.2378366328  
H,0,6.8963127115,-6.8111276104,-1.6606871889  
H,0,2.7879864535,-7.5724317498,-2.6859015688  
H,0,5.1674284508,-8.3030807734,-2.6535417865  
N,0,2.8261727321,-1.360144527,-1.257935719  
O,0,3.7808917977,-0.6750671204,-0.7935194701

O,0,1.8145080694,-0.7774863571,-1.8145104538  
H,0,1.4878995198,0.7696558938,-1.3311065139  
C,0,-2.698374536,-2.6453788419,-1.5788536064  
H,0,-3.3623142573,-2.0651173122,-2.2171384579  
C,0,-1.9135032928,-3.6160710788,-2.5295890999  
C,0,-0.8162228744,-4.433260945,-1.8196728488  
H,0,-0.1365652595,-3.7903420326,-1.2507308572  
H,0,-1.234655199,-5.1625983773,-1.1263465606  
H,0,-0.2200805885,-4.9634306731,-2.5745091001  
C,0,-1.2450171608,-2.7676037701,-3.6310370312  
H,0,-1.9711573234,-2.1471187921,-4.1675061232  
H,0,-0.4737805217,-2.106523207,-3.2215372223  
H,0,-0.7605591631,-3.4271900793,-4.3621895819  
C,0,-2.9218032359,-4.5772109331,-3.1877734079  
H,0,-3.6888078872,-4.0336001757,-3.753296914  
H,0,-2.4044271001,-5.2387647543,-3.893568044  
H,0,-3.4201937534,-5.211213708,-2.447193592  
C,0,-3.4999776949,-3.3657530565,-0.4576262535  
O,0,-3.0349811327,-4.3734137645,0.0834470869  
N,0,-4.6908171522,-2.8412101465,-0.0278062501  
C,0,-5.3233209664,-3.5248268468,1.115009982  
H,0,-6.3685360351,-3.2006063046,1.1518490758  
H,0,-5.3161677551,-4.6004038871,0.9155402603  
C,0,-5.39284928,-1.668749853,-0.5670279696  
H,0,-5.6562063575,-1.0250516622,0.2803404004  
H,0,-4.714066423,-1.0832168976,-1.1883348413  
C,0,-4.6568977521,-3.2651161279,2.482223218  
H,0,-3.6156890604,-3.5956515891,2.3992251649  
C,0,-5.348575093,-4.12389905,3.5500332086  
H,0,-5.3089126752,-5.1906503207,3.297371754  
H,0,-4.8673378353,-3.9972116776,4.5271503539  
H,0,-6.4057574646,-3.8469424324,3.6654093599  
C,0,-4.6631287187,-1.783168558,2.8776187387  
H,0,-4.1324852716,-1.1625078335,2.147196121  
H,0,-5.6863291125,-1.3943650461,2.9753860804  
H,0,-4.1661180743,-1.6390491133,3.8448832948  
C,0,-6.6776233571,-1.989725658,-1.3629115459  
H,0,-7.3460984109,-2.5735234976,-0.7135605101  
C,0,-7.3950340825,-0.6777910855,-1.7111643619  
H,0,-6.7736917039,-0.0441026398,-2.3567685654  
H,0,-8.3337894578,-0.8738270553,-2.2430073895  
H,0,-7.6370581415,-0.0982693112,-0.8116180073  
C,0,-6.4031906695,-2.8211564851,-2.6204458397

H,0,-5.8931624432,-3.7604219651,-2.3813357765  
H,0,-7.3414312149,-3.0762991843,-3.1282838543  
H,0,-5.7828387724,-2.2661139035,-3.3360889557  
C,0,2.8457515184,-5.6838059343,3.0818603222  
H,0,1.7563121879,-5.5827220277,3.1226220927  
H,0,3.0961045194,-6.7240334276,3.3208857638  
H,0,3.2746100009,-5.0456298223,3.8632915536

-----

**dr2-TS-CCAttack-Tak**

E(RB3LYP)= -3353.33324192 Hartree

Sum of electronic and thermal Free Energies= -3352.242251 Hartree

C,0,0.2026166857,2.8742780656,-0.47737216  
C,0,0.6452279487,5.3494914338,-0.1532417965  
C,0,0.7911419755,4.1590835999,-1.1218662407  
H,0,-0.6299073332,2.4778689363,-1.0600105436  
H,0,1.8507698772,4.0124947202,-1.3522727584  
H,0,0.2912995425,4.3653207253,-2.0723477645  
C,0,0.5501044426,3.8080614453,1.8362365341  
H,0,-0.0324389183,4.1146051538,2.7079953823  
H,0,1.2031356339,2.986570961,2.1366880771  
C,0,1.3155869587,4.9834273458,1.1862939007  
H,0,1.3160787973,5.8455847997,1.8611345656  
H,0,2.3624571161,4.7082201841,1.0185264028  
H,0,1.1223680846,6.2355595257,-0.5820742609  
C,0,-0.8539987386,5.6499991213,0.126870603  
H,0,-0.8934314793,6.3665514122,0.9562625549  
C,0,-1.5106519926,4.3184467058,0.5759461346  
H,0,-2.0751908392,4.4234952399,1.5045663169  
H,0,-2.1738311541,3.8891256057,-0.1756758376  
N,0,-0.4460192192,3.2768871408,0.8370005307  
C,0,-1.5880530254,6.2566927482,-1.0408610276  
H,0,-1.6997950343,5.6269225616,-1.9244805528  
C,0,-2.0993424562,7.4880776919,-1.0512975358  
H,0,-2.6146169176,7.8837938383,-1.9228367969  
H,0,-2.0249831607,8.1496365185,-0.1897107778  
C,0,1.2604202975,1.7603198509,-0.2741963342  
H,0,2.1164031127,2.1743086221,0.2544512251  
C,0,1.704649006,1.249489132,-1.6514109046  
C,0,3.0366336238,1.4340627076,-2.1533925474  
C,0,0.7964261377,0.5962996939,-2.4587473975  
C,0,4.0852320007,2.0613680632,-1.438390917  
C,0,3.3073049072,0.9480622787,-3.4800939277

C,0,1.1785985286,0.1427251399,-3.7428610239  
H,0,-0.2198754309,0.4129475829,-2.1231009934  
C,0,5.3412671973,2.2214621619,-2.0012172832  
H,0,3.9508366013,2.3969576547,-0.4169435247  
C,0,4.6028163326,1.1287186457,-4.0247643497  
H,0,0.4495084316,-0.3730299252,-4.3663499747  
C,0,5.6027890591,1.7518292839,-3.3142869053  
H,0,4.780509249,0.7533240066,-5.0279169884  
H,0,6.5834199847,1.8725554961,-3.7601739063  
N,0,0.7534839283,0.6878967737,0.5798290036  
O,0,6.2706970074,2.842341708,-1.2227380677  
C,0,7.5966915443,2.9848863737,-1.7192080049  
H,0,8.1601712028,3.4748893617,-0.9224570501  
H,0,8.0564978233,2.0122938724,-1.9356075475  
H,0,7.6295931063,3.6131697705,-2.6186392873  
N,0,2.3793204613,0.3140179133,-4.2538632955  
H,0,-0.0087750752,0.1215711081,0.1944358479  
C,0,1.5208551899,0.0482517913,1.5290908151  
N,0,1.0422145338,-1.1614220792,1.8862810978  
H,0,0.2209981022,-1.4971398326,1.3623180573  
S,0,2.9194948474,0.766371894,2.2041991304  
O,0,-4.632909899,0.5656271962,-1.3605589526  
O,0,-2.8346610822,1.883065224,-0.9378322108  
O,0,-3.8104650781,0.3433547606,3.1160449421  
O,0,-2.1831030211,1.5380895759,2.1244101313  
C,0,-3.2111360482,0.8648376477,2.0314431127  
C,0,-3.6698419732,1.0930257612,-0.5130269127  
C,0,-3.9447383041,0.5604939415,0.8125797677  
C,0,-5.0073429887,-0.3149176585,0.695694072  
C,0,-5.3679619346,-0.4124545356,-0.6706515616  
C,0,-6.7812682632,-0.5897297728,-1.1637579868  
C,0,-3.1894634748,0.5918704171,4.3996011329  
C,0,-4.0301110818,-0.1041547851,5.4502088663  
H,0,-5.454081728,-0.891940294,1.4937904097  
H,0,-6.76922777,-0.7917370286,-2.2388155828  
H,0,-2.1655067804,0.2094335182,4.3802682795  
H,0,-3.1450817977,1.6738152014,4.5648277483  
H,0,-5.0565842215,0.2780512558,5.452814129  
H,0,-3.5962741191,0.0699682504,6.4413741038  
H,0,-4.0611216567,-1.1843358482,5.2743613613  
H,0,-7.2003667615,-1.4804592004,-0.6794704033  
C,0,-4.2669807969,-2.1513138609,-1.1864179126  
H,0,-4.5763015667,-2.7735309036,-0.3521910414

C,0,-2.9105381428,-1.7638297277,-1.1577770402  
H,0,-2.3693697177,-1.3978204828,-2.015839172  
C,0,-4.8649274938,-2.5336234647,-2.4889471062  
C,0,-5.7412009651,-3.6307293015,-2.5434270713  
C,0,-4.577748523,-1.850086541,-3.685062139  
C,0,-6.2951297478,-4.0486059329,-3.7531934275  
H,0,-5.9751713968,-4.1696897733,-1.6283805568  
C,0,-5.1352964087,-2.2655967215,-4.8923358848  
H,0,-3.9305879276,-0.9785540624,-3.6665208201  
C,0,-5.9930367549,-3.3684266568,-4.9337207078  
H,0,-6.9611199305,-4.9074023652,-3.7720659269  
H,0,-4.9004879201,-1.7248030156,-5.8055239706  
H,0,-6.4232268607,-3.6916517455,-5.8778862155  
N,0,-2.1564679011,-1.8666630974,-0.0253133542  
O,0,-2.6284075122,-2.3068122876,1.049904974  
O,0,-0.9138401481,-1.5294836018,-0.1162142931  
H,0,-0.9431342132,2.4514025634,1.2283560064  
C,0,1.6386270078,-2.106708801,2.8376025929  
H,0,2.6338482161,-1.7265348383,3.0718353295  
C,0,0.8595659875,-2.1879515888,4.1973501531  
C,0,-0.6284893517,-2.5459934089,4.0205325572  
H,0,-1.1417470295,-1.8455796129,3.3526137445  
H,0,-0.7542879602,-3.5449885412,3.6034200651  
H,0,-1.1318651161,-2.5077946424,4.9958914522  
C,0,0.9494574484,-0.8126810958,4.8896142081  
H,0,1.9863390052,-0.512471702,5.0766088786  
H,0,0.4800949528,-0.0242357595,4.2920283338  
H,0,0.4315356421,-0.852463271,5.8566426323  
C,0,1.5494396134,-3.2265210452,5.1039914941  
H,0,2.6093264532,-2.9836198906,5.2580137643  
H,0,1.0718002039,-3.2373232674,6.0916241979  
H,0,1.482061049,-4.2340543014,4.6867850422  
C,0,1.7533543213,-3.4694121272,2.0867556618  
O,0,0.9419038731,-4.3758685392,2.2886765596  
N,0,2.7337013396,-3.6206943917,1.1419630126  
C,0,2.6850227298,-4.8578901575,0.3431026325  
H,0,3.6564812947,-4.9643930626,-0.1511423843  
H,0,2.5626040687,-5.7066165534,1.0228442185  
C,0,3.8518810391,-2.7074542801,0.8811820576  
H,0,3.9252046138,-2.57403425,-0.204569346  
H,0,3.6344274671,-1.7219869352,1.2938047018  
C,0,1.5639543421,-4.8918636109,-0.7166807488  
H,0,0.6126597723,-4.7889720236,-0.1832925259

C,0,1.5760327067,-6.255117798,-1.4207289611  
H,0,1.4627393293,-7.0801246558,-0.706352418  
H,0,0.7554689602,-6.329018912,-2.1442536501  
H,0,2.5146735884,-6.4149554413,-1.9695754257  
C,0,1.6709052959,-3.7436877413,-1.7271699772  
H,0,1.6137878411,-2.7667780271,-1.2363655879  
H,0,2.6100159972,-3.7914695198,-2.2961759411  
H,0,0.8470123787,-3.7884659228,-2.449700519  
C,0,5.2152247716,-3.1952614251,1.4222714394  
H,0,5.4060288872,-4.1984825526,1.0142291251  
C,0,6.3230180766,-2.2623799025,0.9143960431  
H,0,6.1706026826,-1.2353937761,1.2701129954  
H,0,7.3077349468,-2.5939228902,1.2653432133  
H,0,6.3535633112,-2.2325384462,-0.1819476877  
C,0,5.2339379243,-3.300064313,2.9514319479  
H,0,4.4454672205,-3.9658892352,3.3201807651  
H,0,6.1924090884,-3.7029430642,3.3012596837  
H,0,5.0991969636,-2.3165114302,3.4195892338  
C,0,-7.6781487436,0.6273868739,-0.8850224163  
H,0,-7.2749335183,1.5284029932,-1.3595368031  
H,0,-8.6848110122,0.4587552181,-1.2855780638  
H,0,-7.7700972027,0.8231697068,0.1895542671

-----

### 4.3 References

- [1] (a) P. Hohenberg and W. Kohn, *Phys. Rev. B*, 1964, **136**, 864; (b) W. Kohn and L. J. Sham, *Phys. Rev. A*, 1965, **140**, 1133.
- [2] M. J. Frisch, G. W. Trucks, H. B. Schlegel, G. E. Scuseria, M. A. Robb, J. R. Cheeseman, G. Scalmani, V. Barone, B. Mennucci, G. A. Petersson, H. Nakatsuji, M. Caricato, X. Li, H. P. Hratchian, A. F. Izmaylov, J. Bloino, G. Zheng, J. L. Sonnenberg, M. Hada, M. Ehara, K. Toyota, R. Fukuda, J. Hasegawa, M. Ishida, T. Nakajima, Y. Honda, O. Kitao, H. Nakai, T. Vreven, J. A., Jr. Montgomery, J. E. Peralta, F. Ogliaro, M. Bearpark, J. J. Heyd, E. Brothers, K. N. Kudin, V. N. Staroverov, R. Kobayashi, J. Normand, K. Raghavachari, A. Rendell, J. C. Burant, S. S. Iyengar, J. Tomasi, M. Cossi, N. Rega, N. J. Millam, M. Klene, J. E. Knox, J. B. Cross, V. Bakken, C. Adamo, J. Jaramillo, R. Gomperts, R. E. Stratmann, O. Yazyev, A. J. Austin, R. Cammi, C. Pomelli, J. W. Ochterski, R. L. Martin, K. Morokuma, V. G. Zakrzewski, G. A. Voth, P. Salvador, J. J. Dannenberg, S. Dapprich, A. D. Daniels, Ö. Farkas, J. B. Foresman, J. V. Ortiz, J. Cioslowski, D. J. Fox, Gaussian 09, revision A. 02; Gaussian, Inc.: Wallingford, CT. 2009.
- [3] (a) A. D. Becke, *J. Chem. Phys.*, 1993, **98**, 5648; (b) C. Lee, W. Yang and R. G. Parr, *Phys. Rev. B*, 1988, **37**, 785; (c) J. P. Perdew, K. Burke and Y. Wang, *Phys. Rev. B*, 1996, **54**, 16533.
- [4] A. Marenich, C. Cramer, D. Truhlar, *J. Phys. Chem. B*, 2009, **113**, 6378.
- [5] C. Legault, CYLview, 1.0b; Université de Sherbrooke: Quebec, Canada, 2009.



## 5. NMR Spectra for Product 1a-d, 3aa-3ba and 4aa.

<sup>1</sup>H NMR of product **1a** (400 MHz, CDCl<sub>3</sub>)

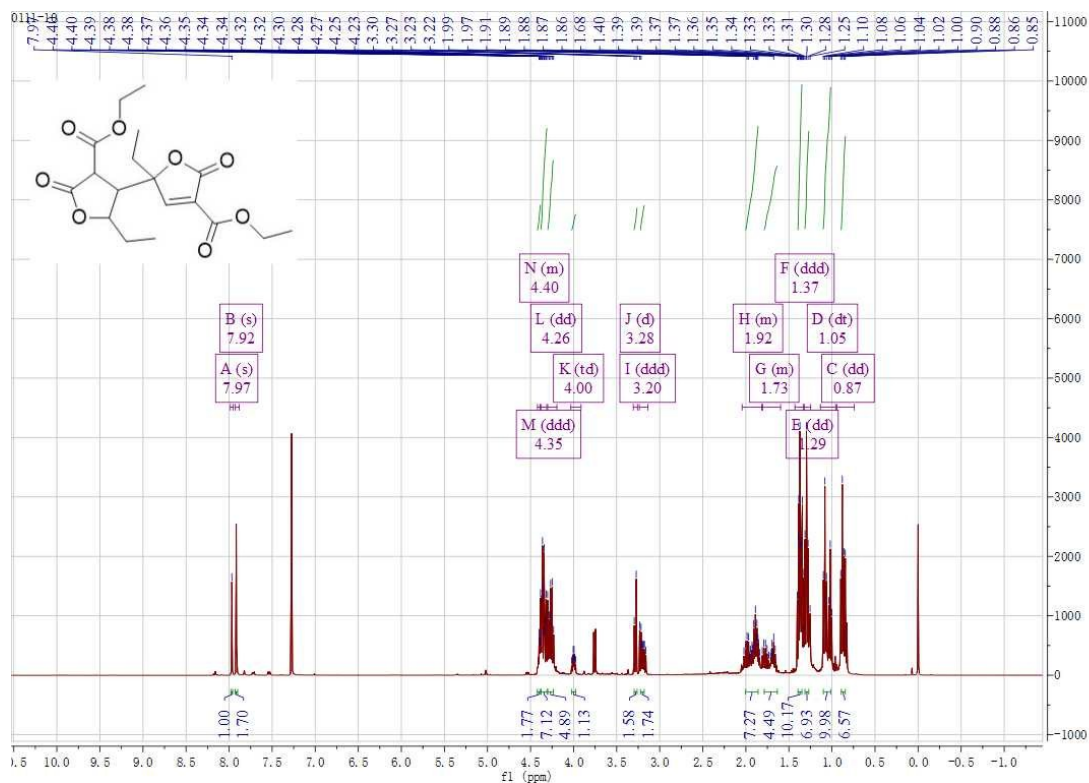

<sup>13</sup>C NMR of product **1a** (100 MHz, CDCl<sub>3</sub>)

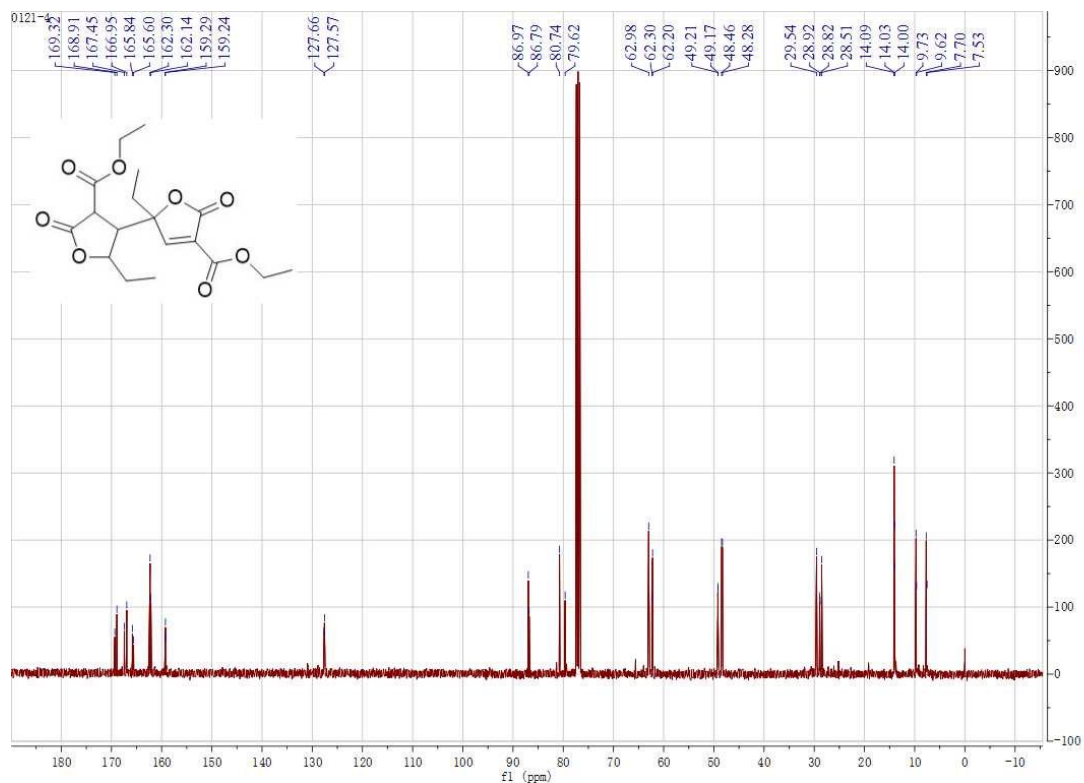

<sup>1</sup>H NMR of product **1b** (400 MHz, CDCl<sub>3</sub>)

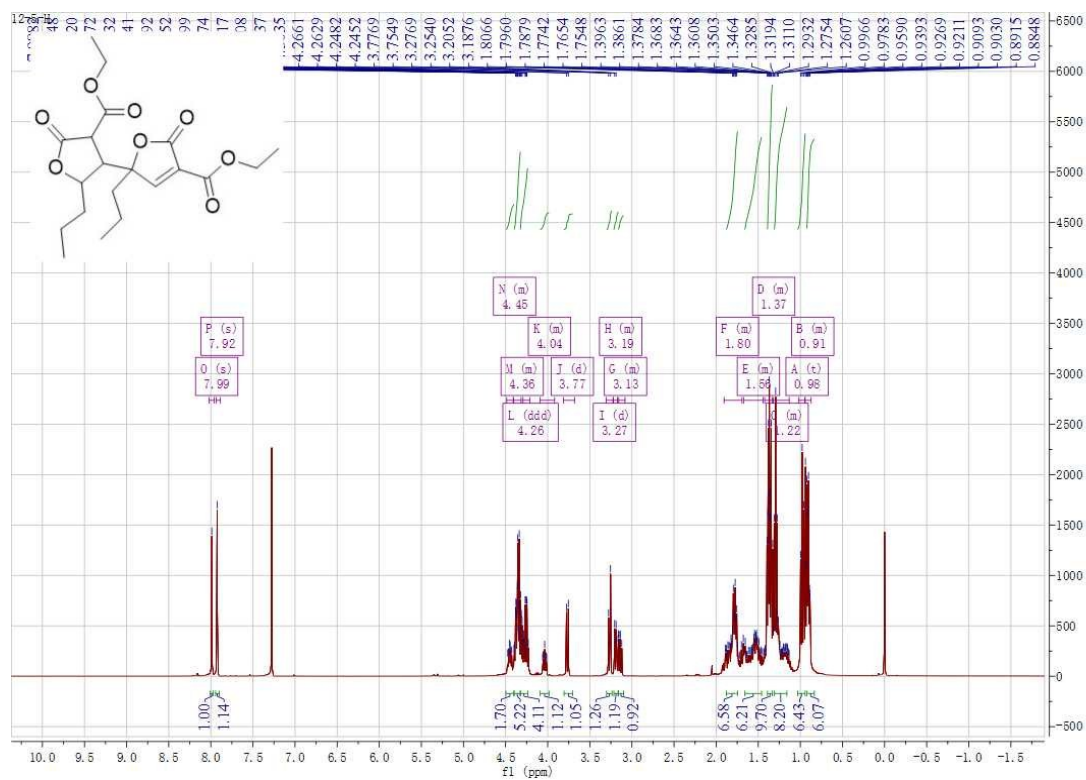

**<sup>13</sup>C NMR of product 1b (100 MHz, CDCl<sub>3</sub>)**

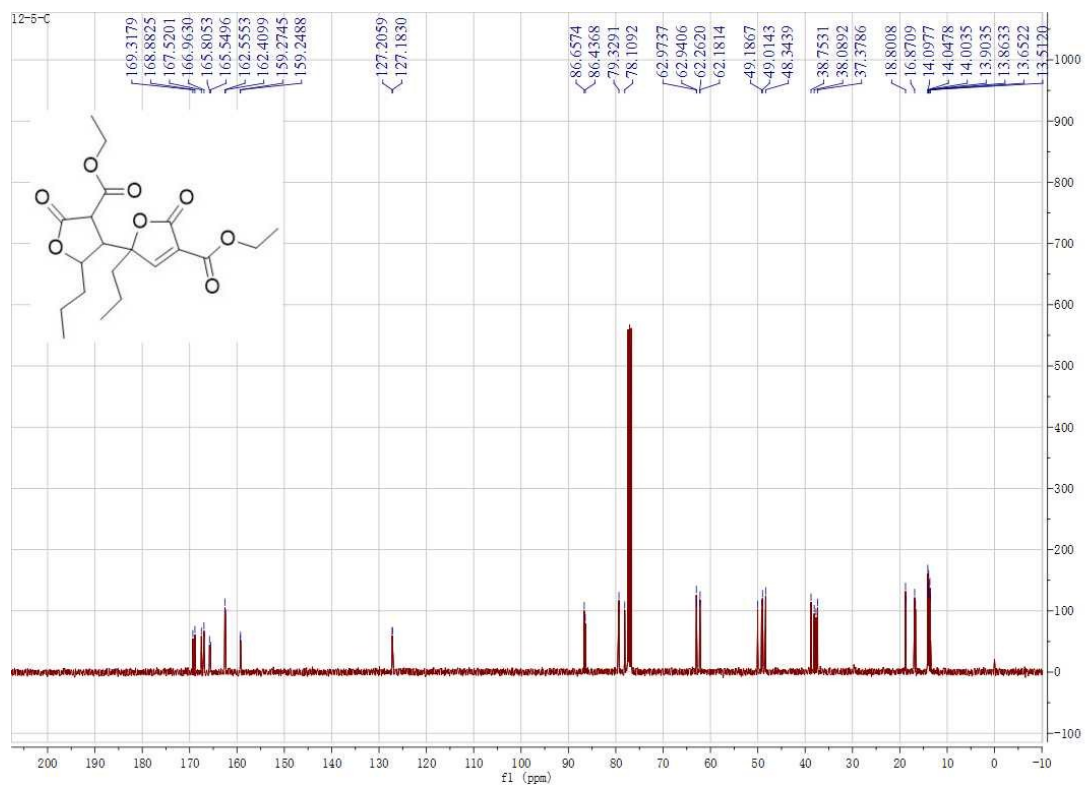

**<sup>1</sup>H NMR of product 1c (400 MHz, DMSO)**

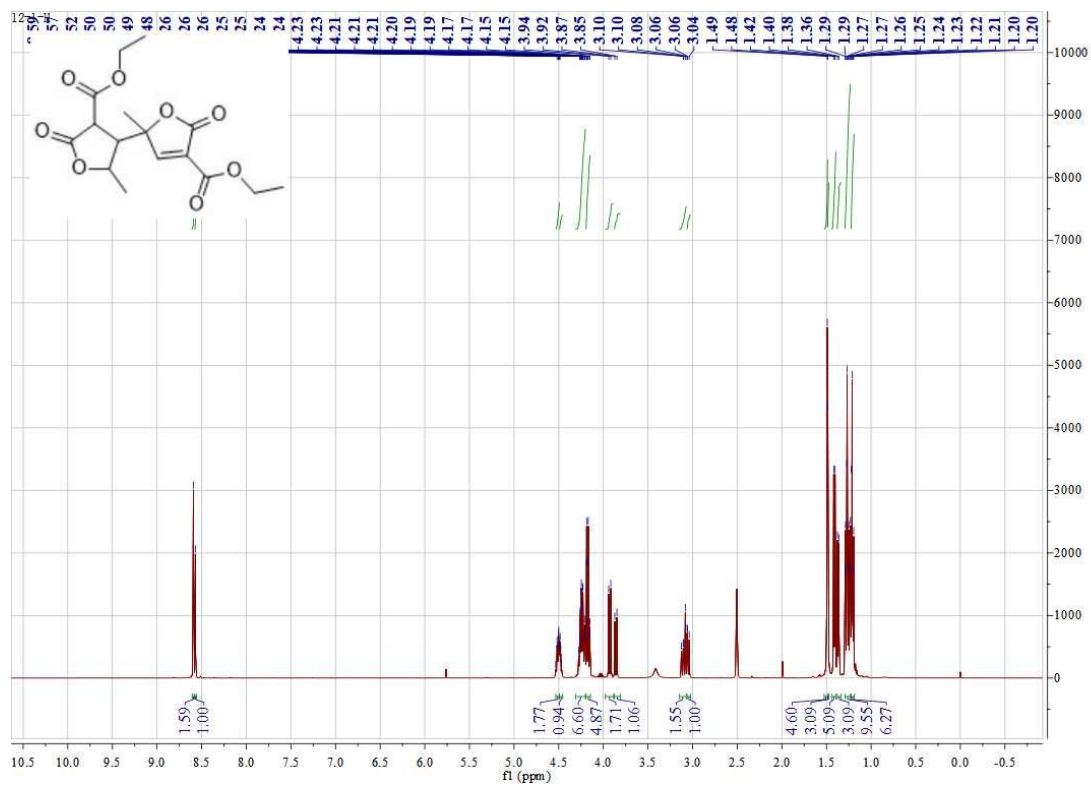

**<sup>13</sup>C NMR of product 1c (100 MHz, DMSO)**

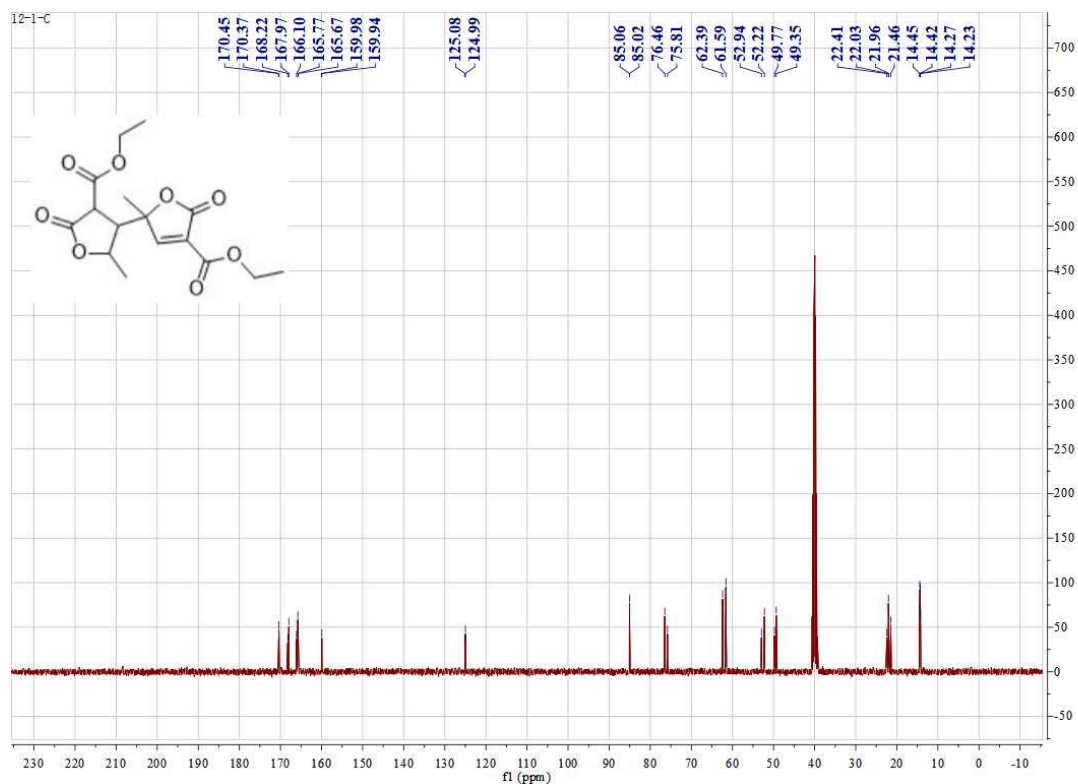

**<sup>1</sup>H NMR of product 1d (400 MHz, CDCl<sub>3</sub>)**

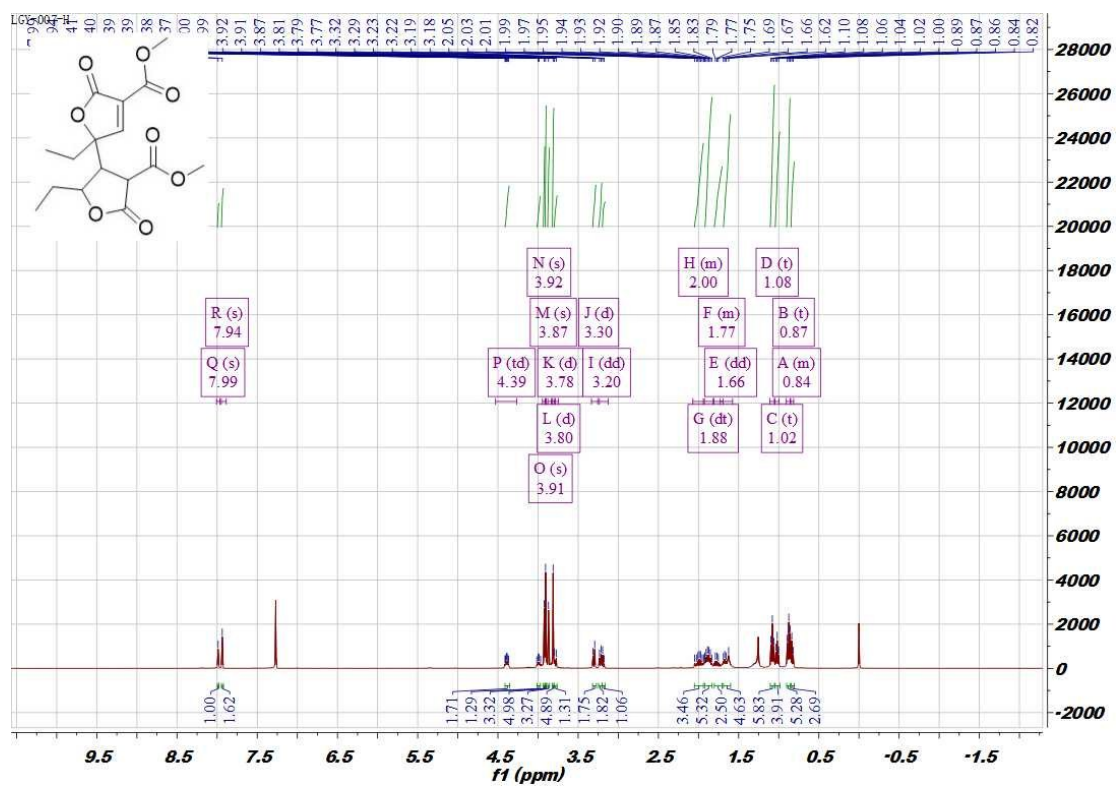

<sup>13</sup>C NMR of product 1d (100 MHz, CDCl<sub>3</sub>)

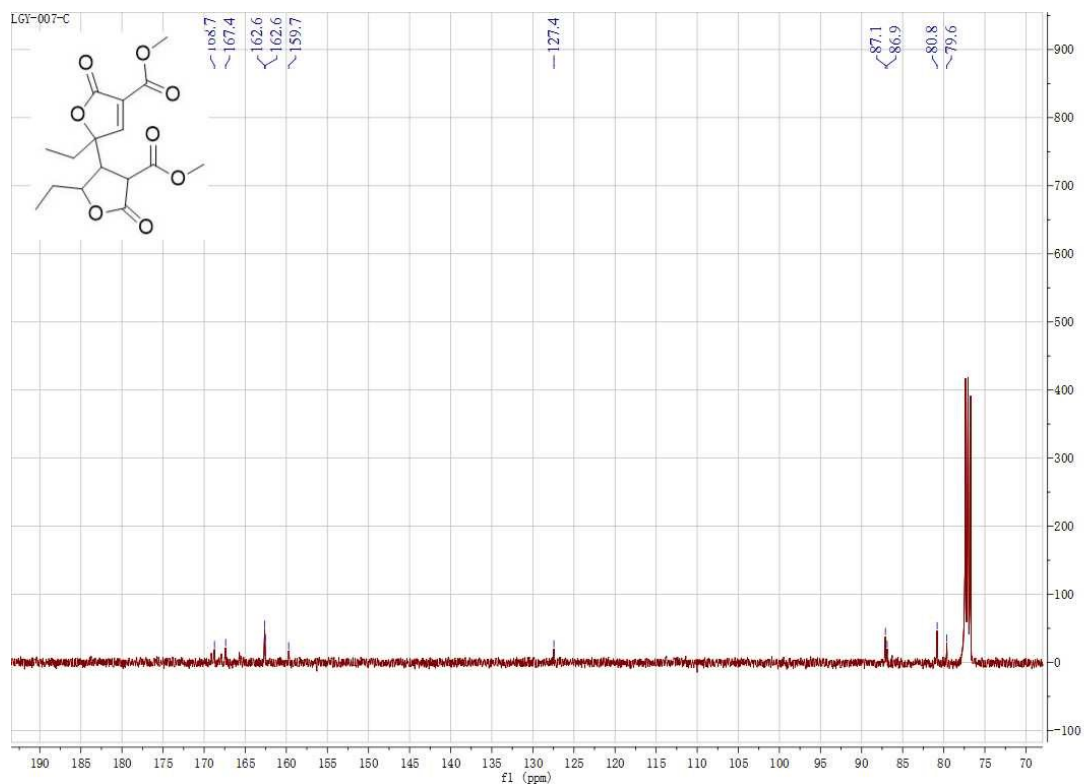

<sup>1</sup>H NMR of product 3aa (400 MHz, CDCl<sub>3</sub>)

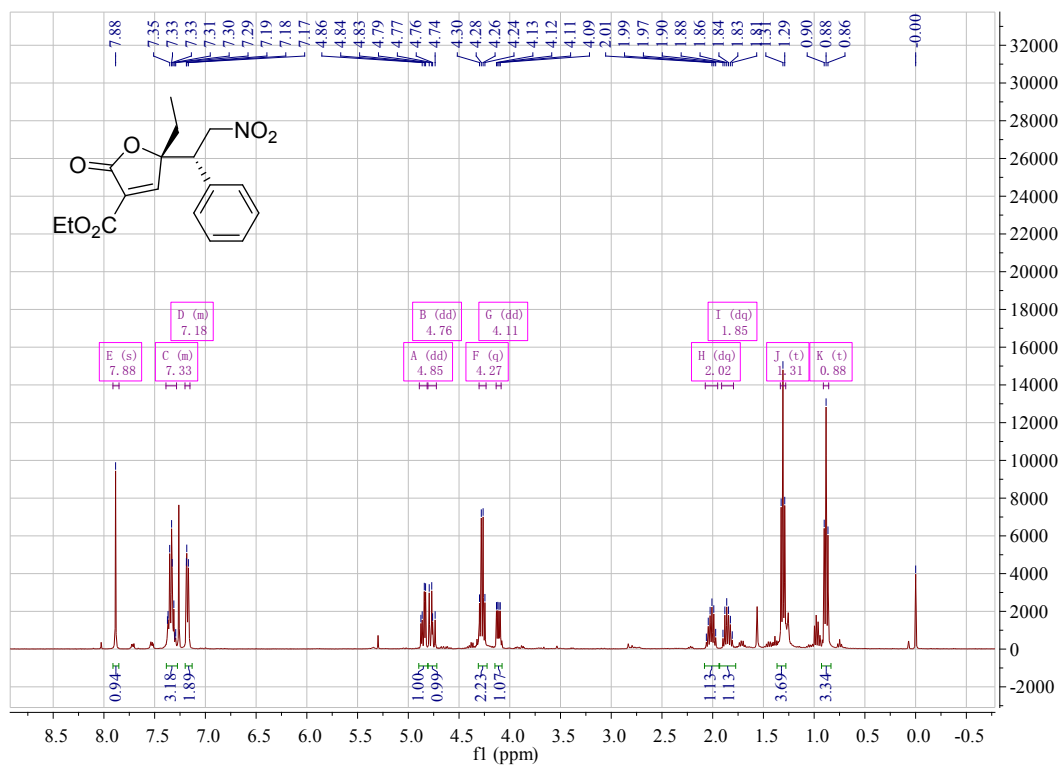

<sup>13</sup>C NMR of product **3aa** (100 MHz, CDCl<sub>3</sub>)

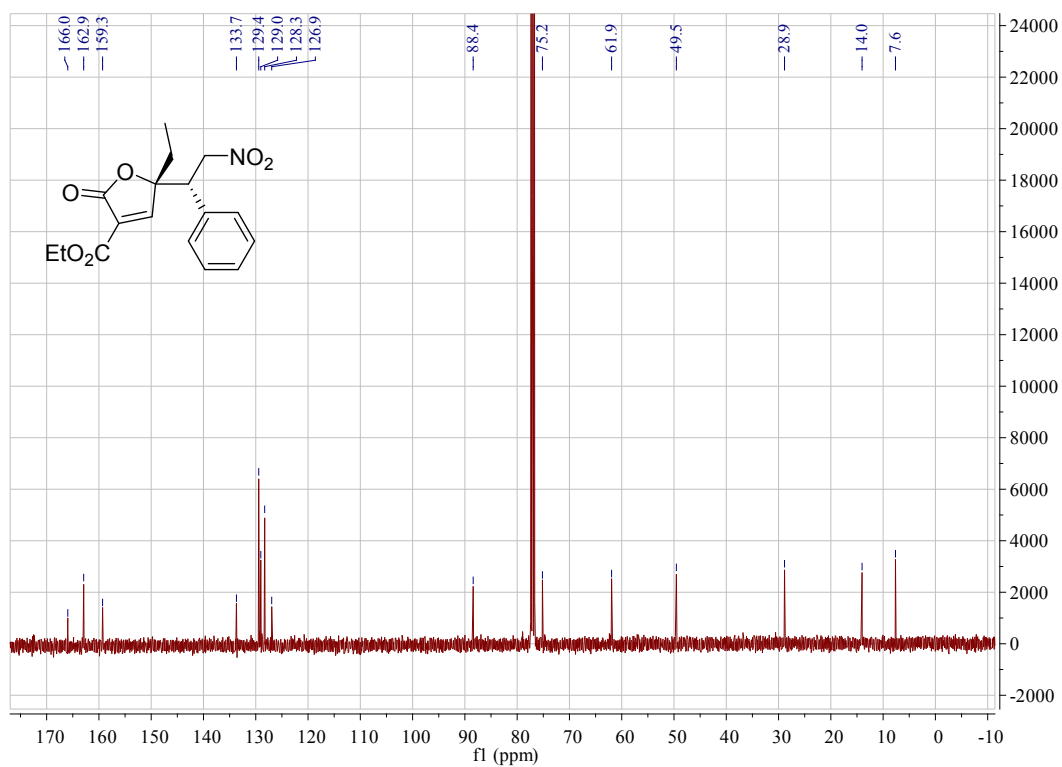

<sup>1</sup>H NMR of product **3ab** (400 MHz, CDCl<sub>3</sub>)



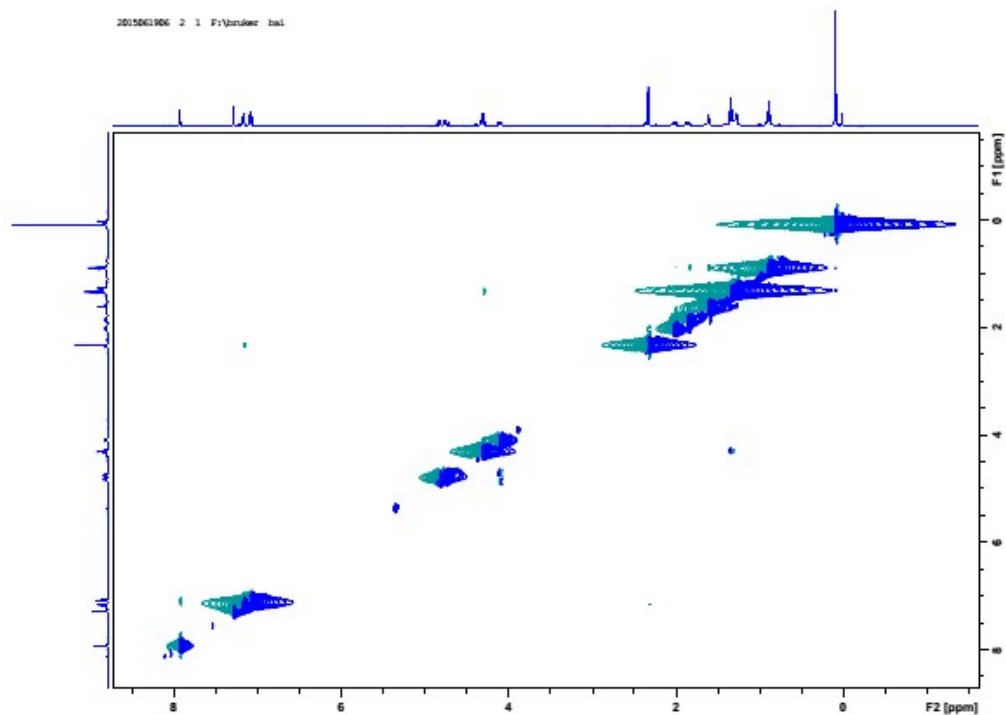

$^1\text{H}$  NMR of product **3ac** (400 MHz,  $\text{CDCl}_3$ )

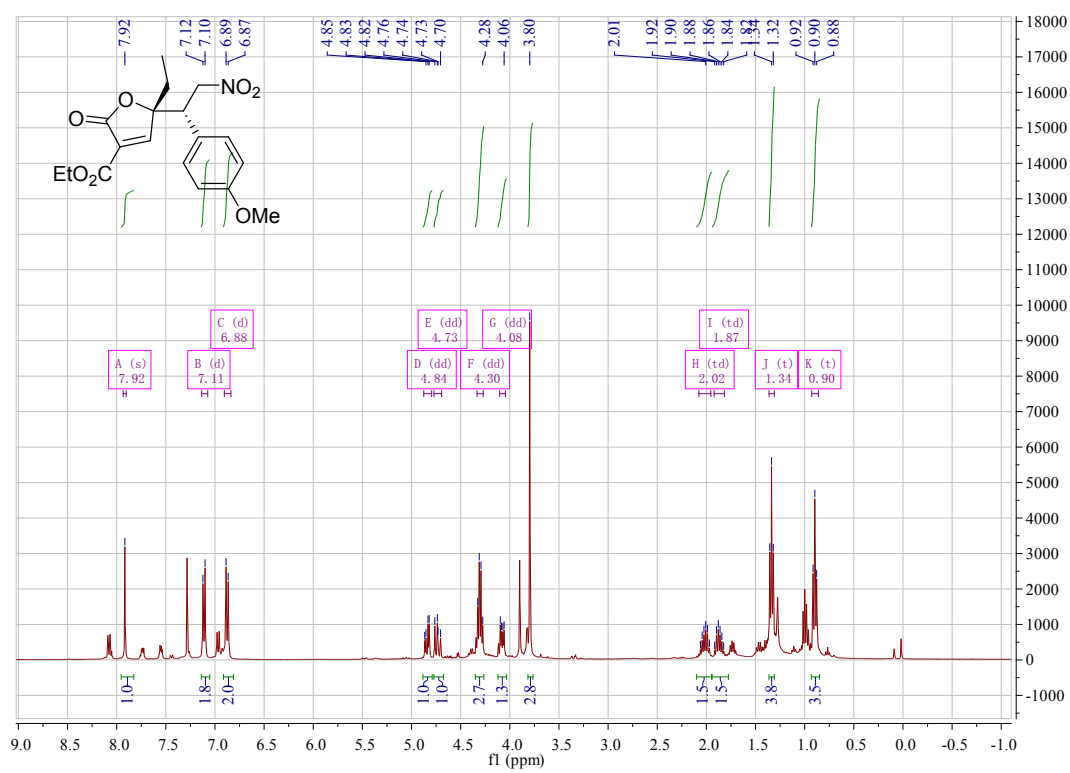

$^{13}\text{C}$  NMR of product **3ac** (100 MHz,  $\text{CDCl}_3$ )



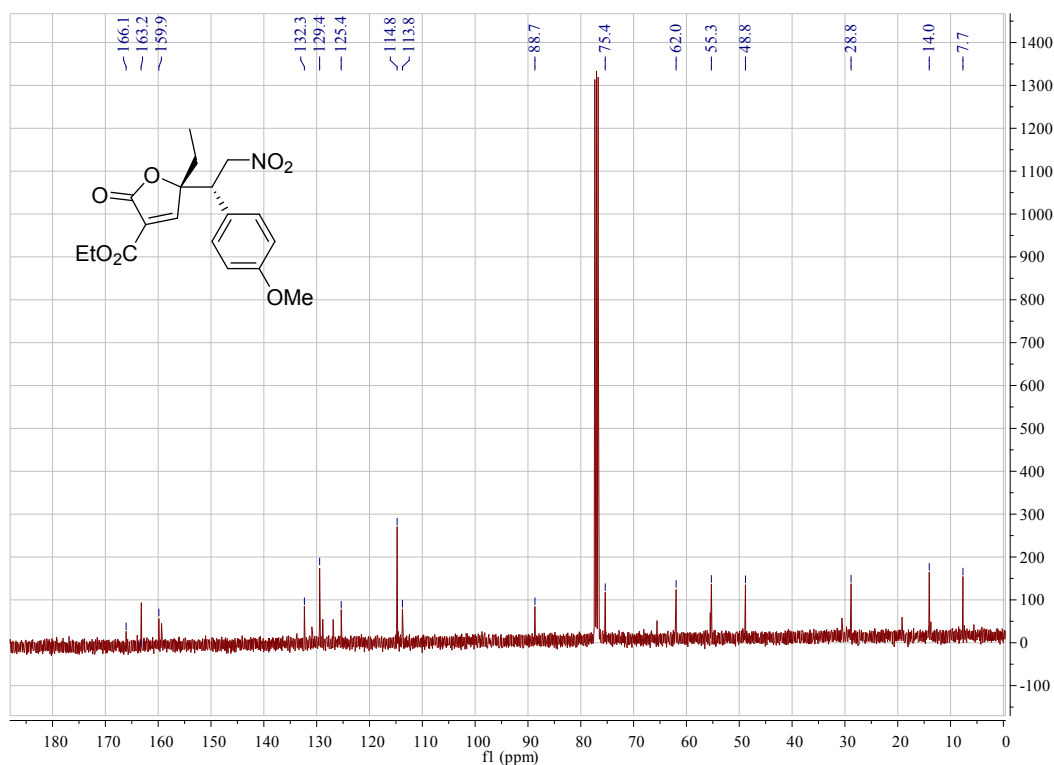

**<sup>1</sup>H NMR of product 3ad (400 MHz, CDCl<sub>3</sub>)**

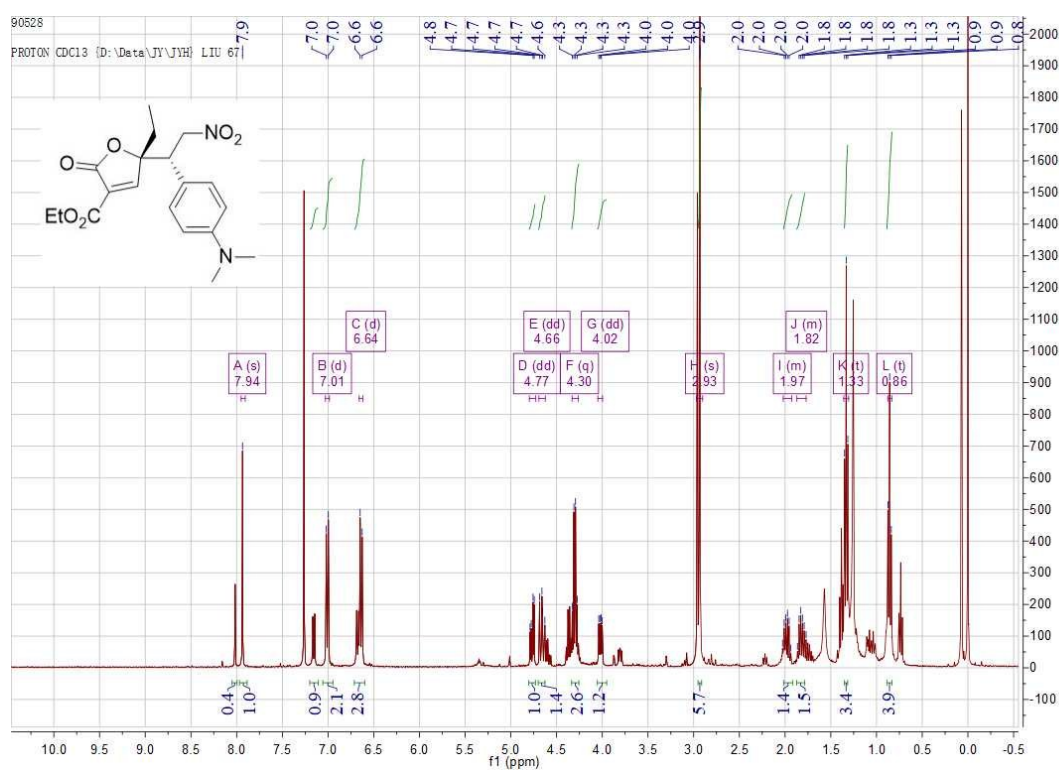

**<sup>13</sup>C NMR of product 3ad (100 MHz, CDCl<sub>3</sub>)**



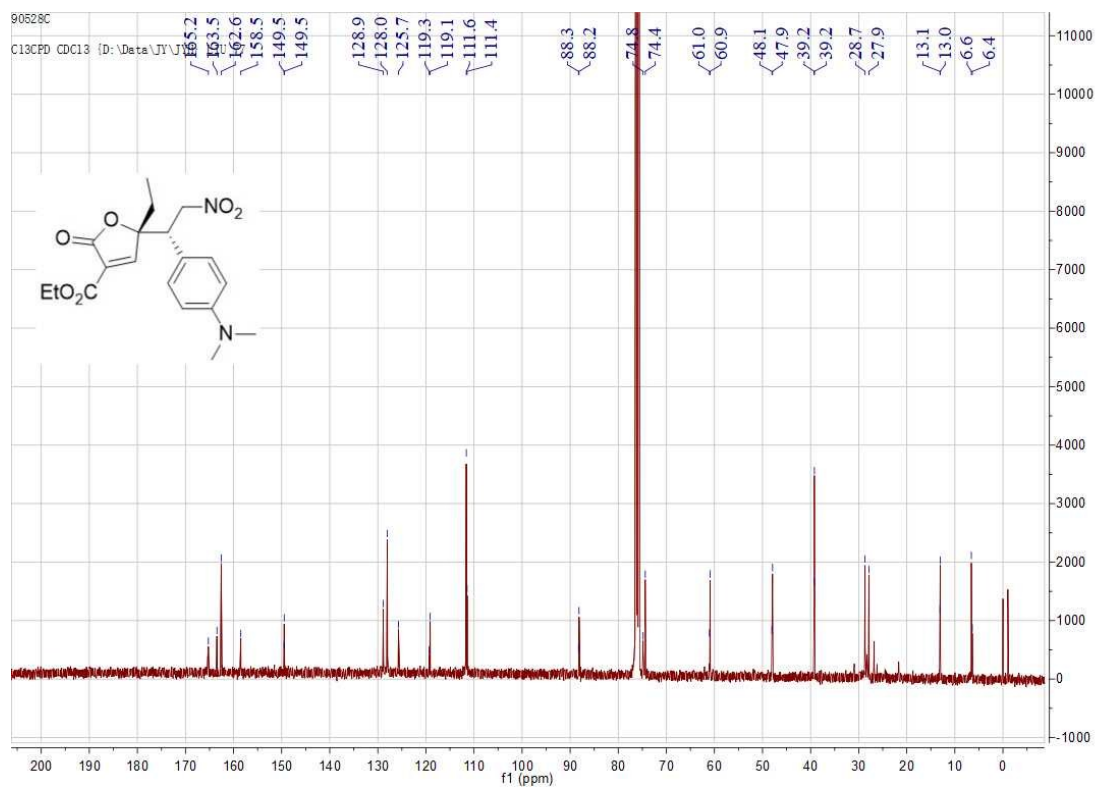

<sup>1</sup>H NMR of product **3ae** (400 MHz, CDCl<sub>3</sub>)

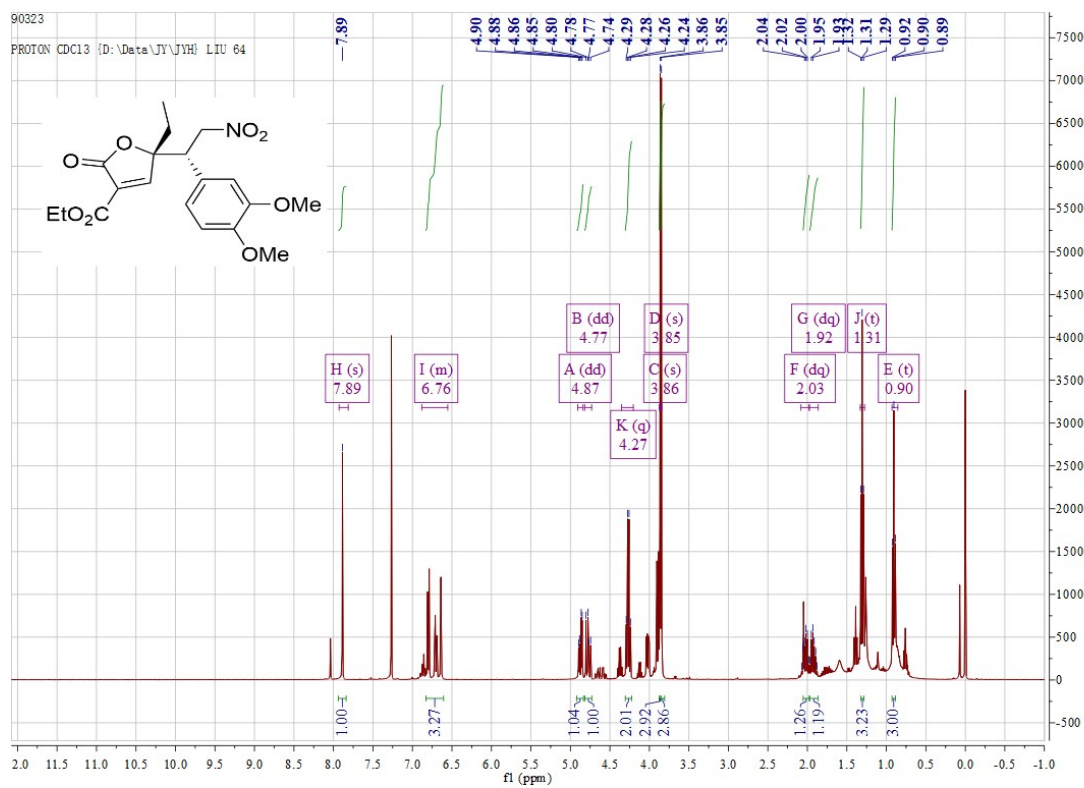

<sup>13</sup>C NMR of product **3ae** (100 MHz, CDCl<sub>3</sub>)

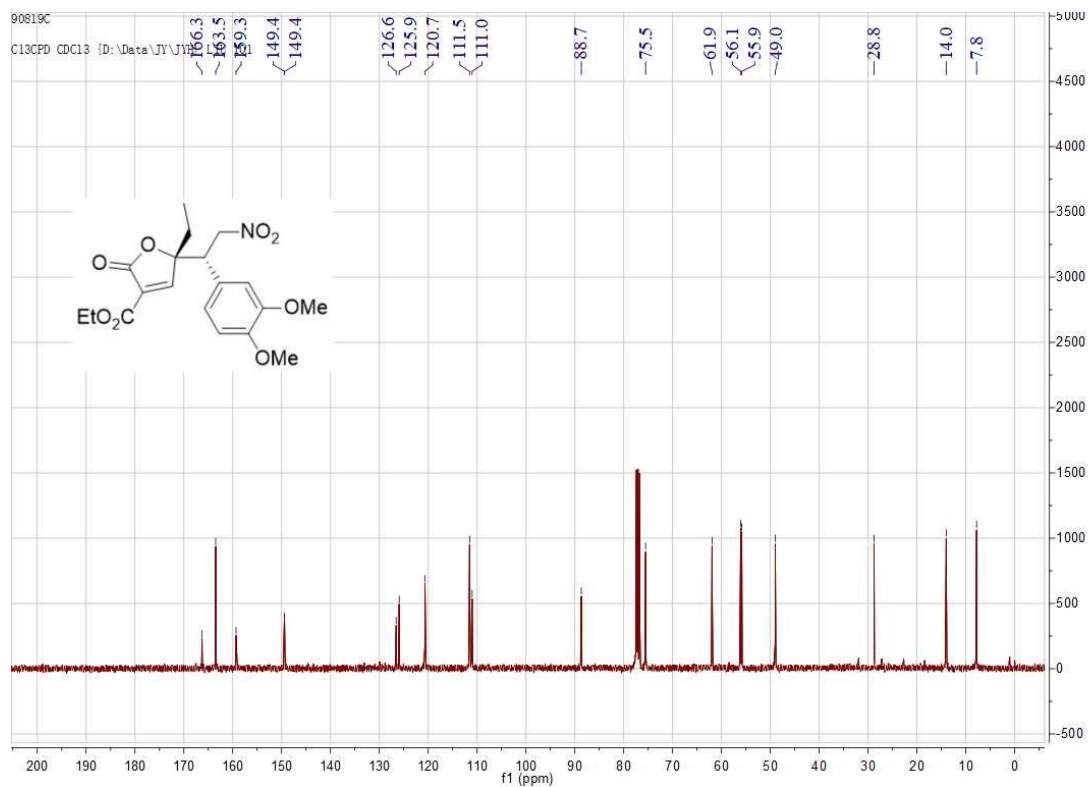

<sup>1</sup>H NMR of product **3af** (400 MHz, CDCl<sub>3</sub>)

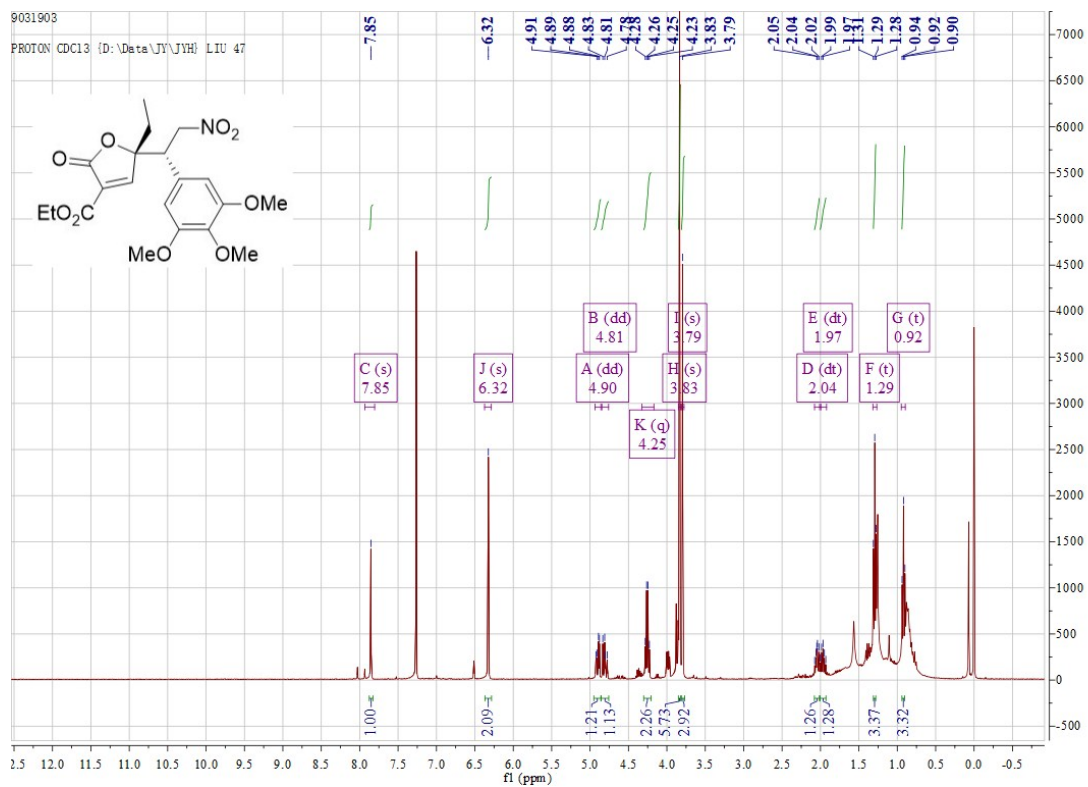

<sup>13</sup>C NMR of product **3f** (100 MHz, CDCl<sub>3</sub>)

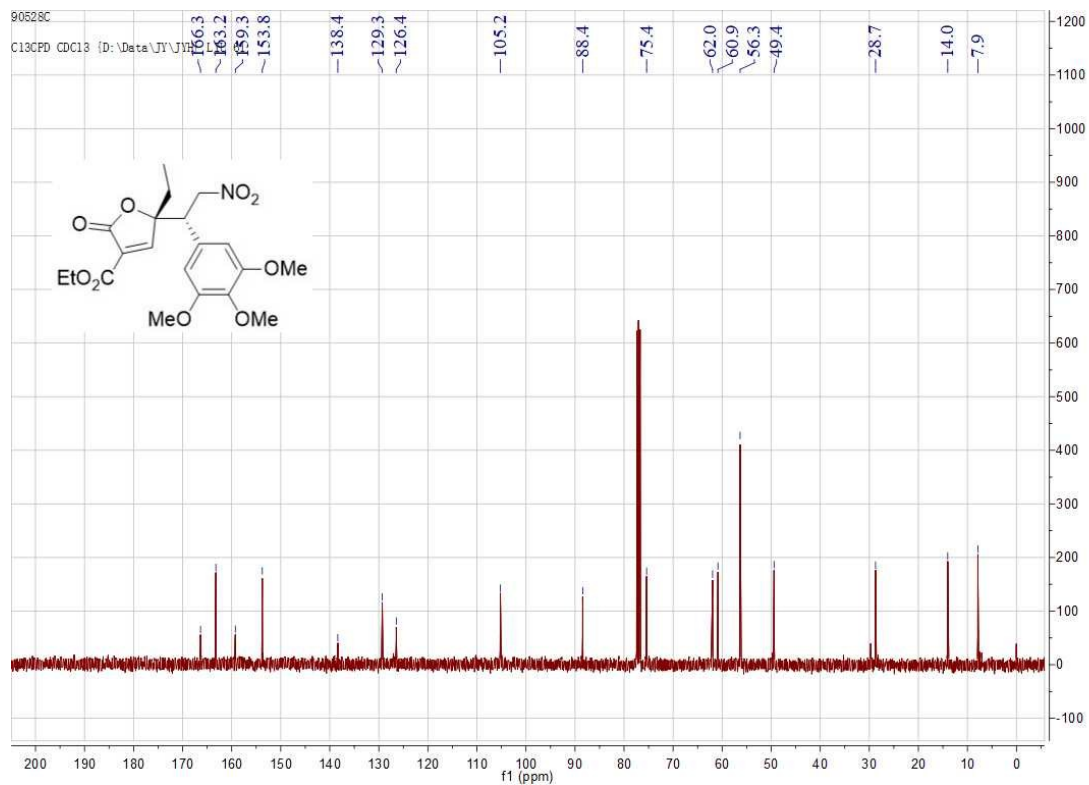

$^1\text{H}$  NMR of product **3ag** (400 MHz,  $\text{CDCl}_3$ )

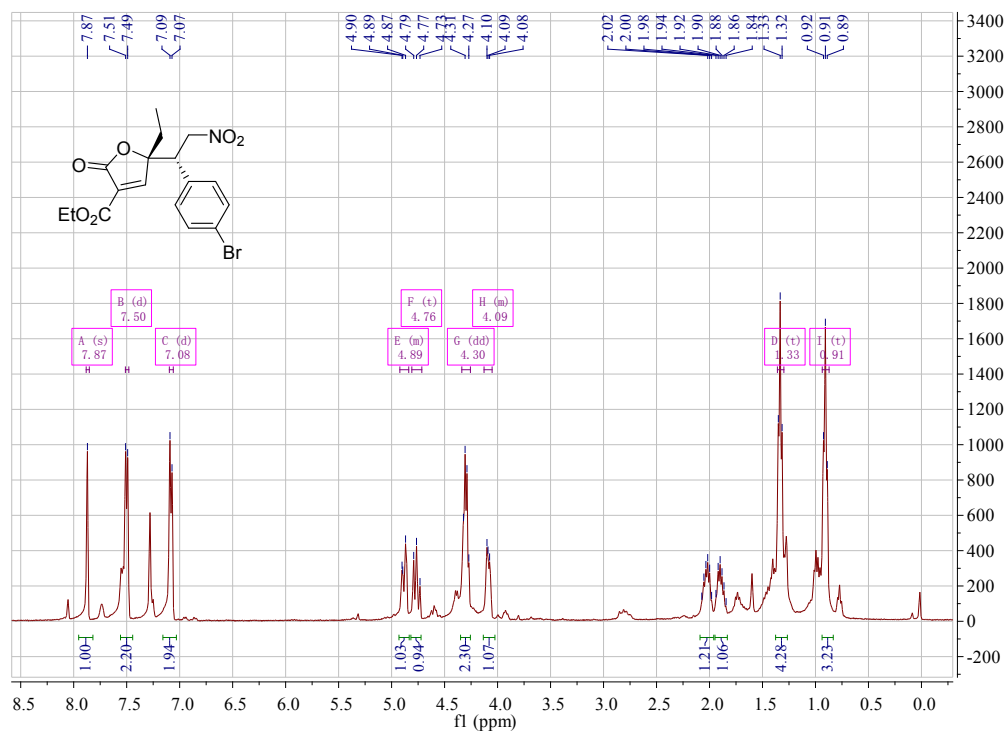

$^{13}\text{C}$  NMR of product **3ag** (100 MHz,  $\text{CDCl}_3$ )

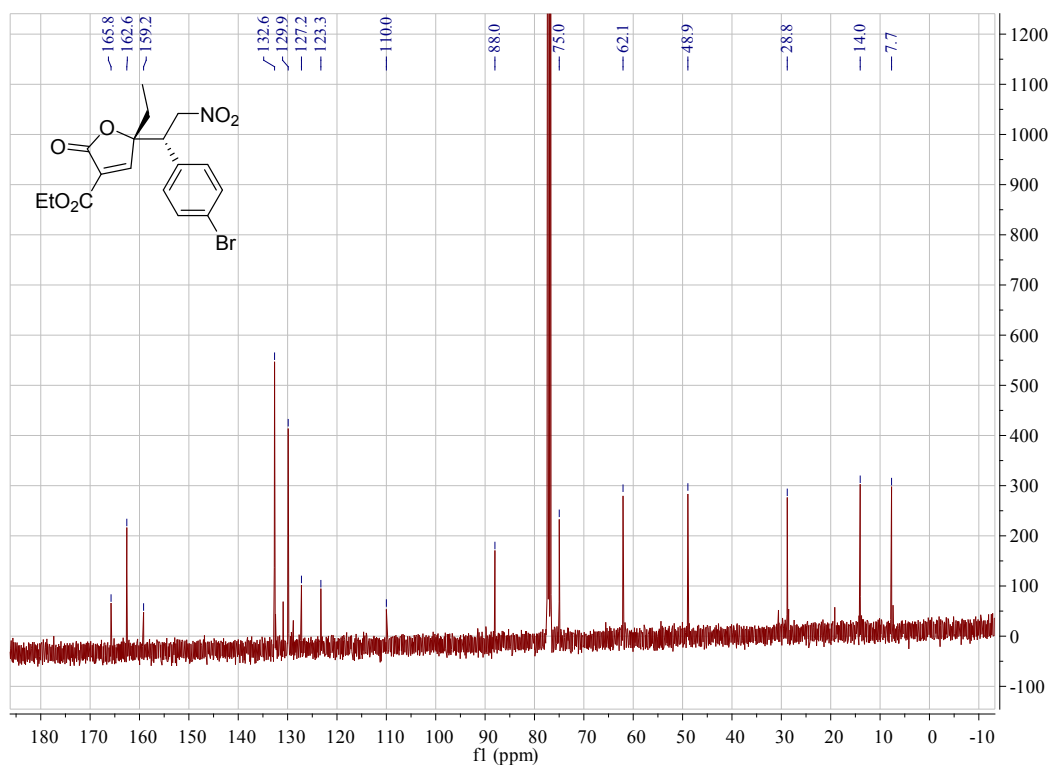

<sup>1</sup>H NMR of product **3ah** (400 MHz, CDCl<sub>3</sub>)

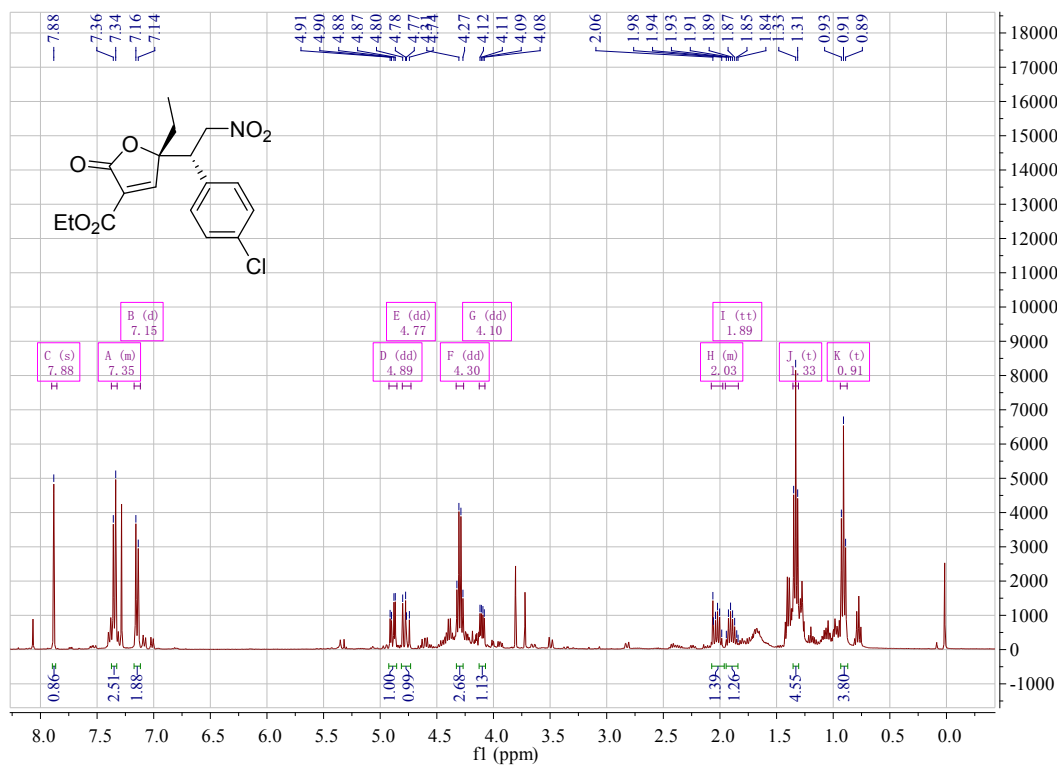

<sup>13</sup>C NMR of product **3ah** (100 MHz, CDCl<sub>3</sub>)

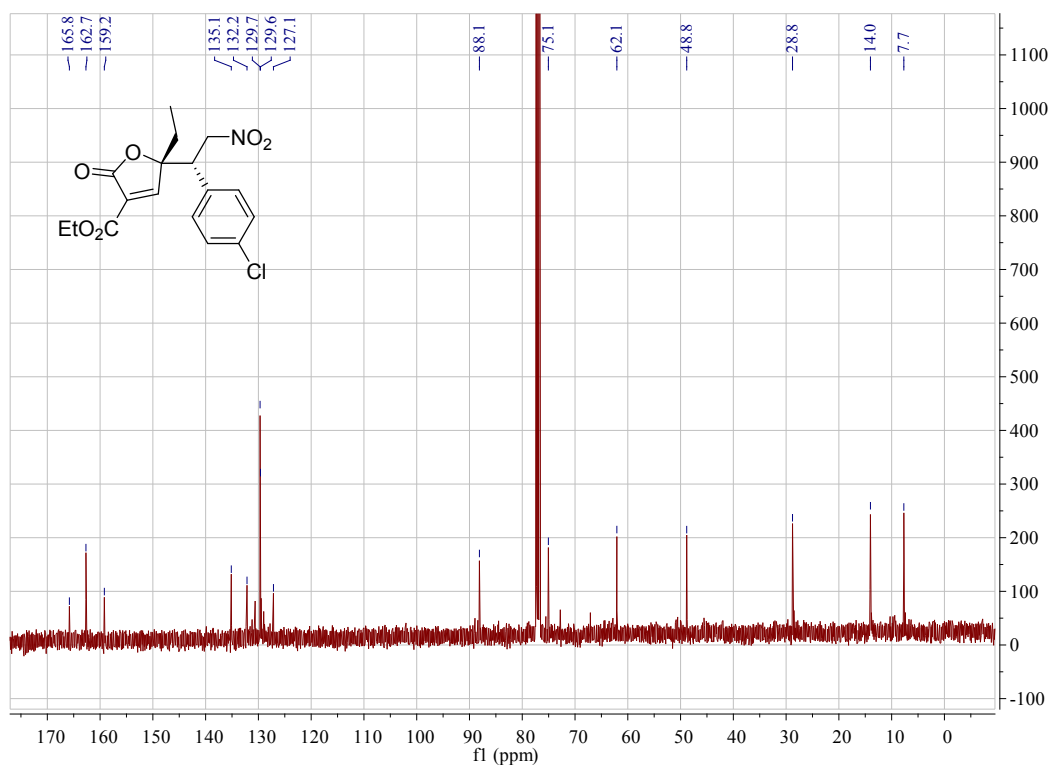

<sup>1</sup>H NMR of product **3ai** (400 MHz, CDCl<sub>3</sub>)

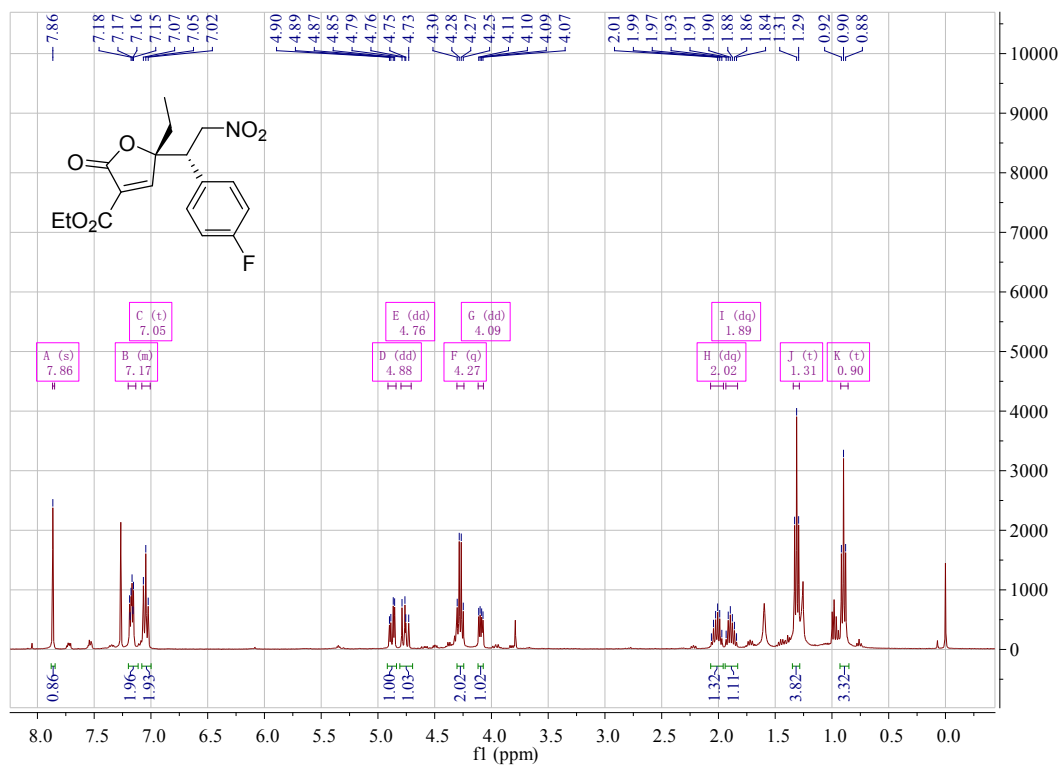

$^{13}\text{C}$  NMR of product **3ai** (100 MHz,  $\text{CDCl}_3$ )

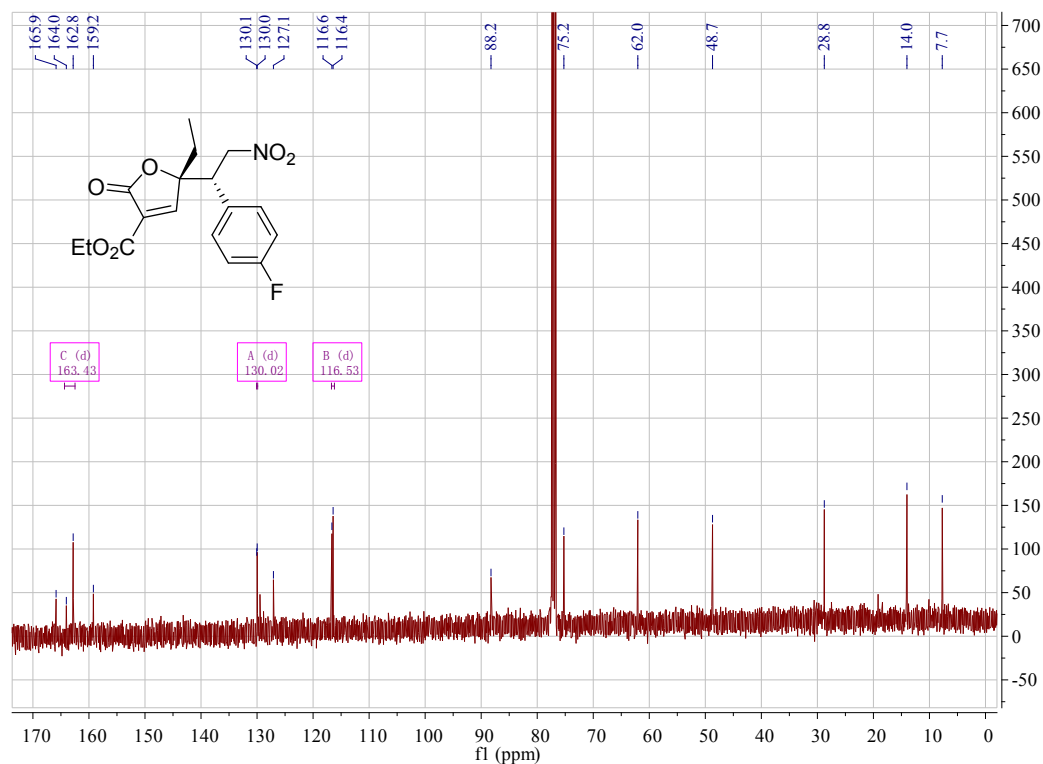

$^1\text{H}$  NMR of product **3aj** (400 MHz,  $\text{CDCl}_3$ )

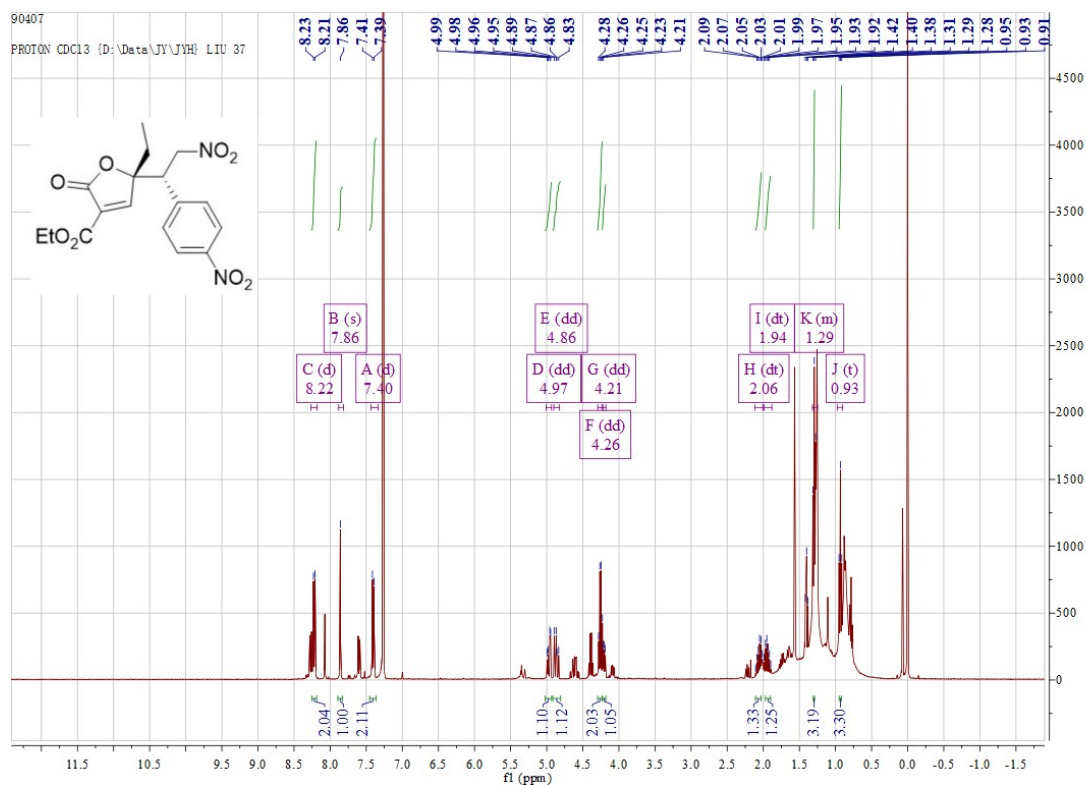

$^{13}\text{C}$  NMR of product **3aj** (100 MHz,  $\text{CDCl}_3$ )

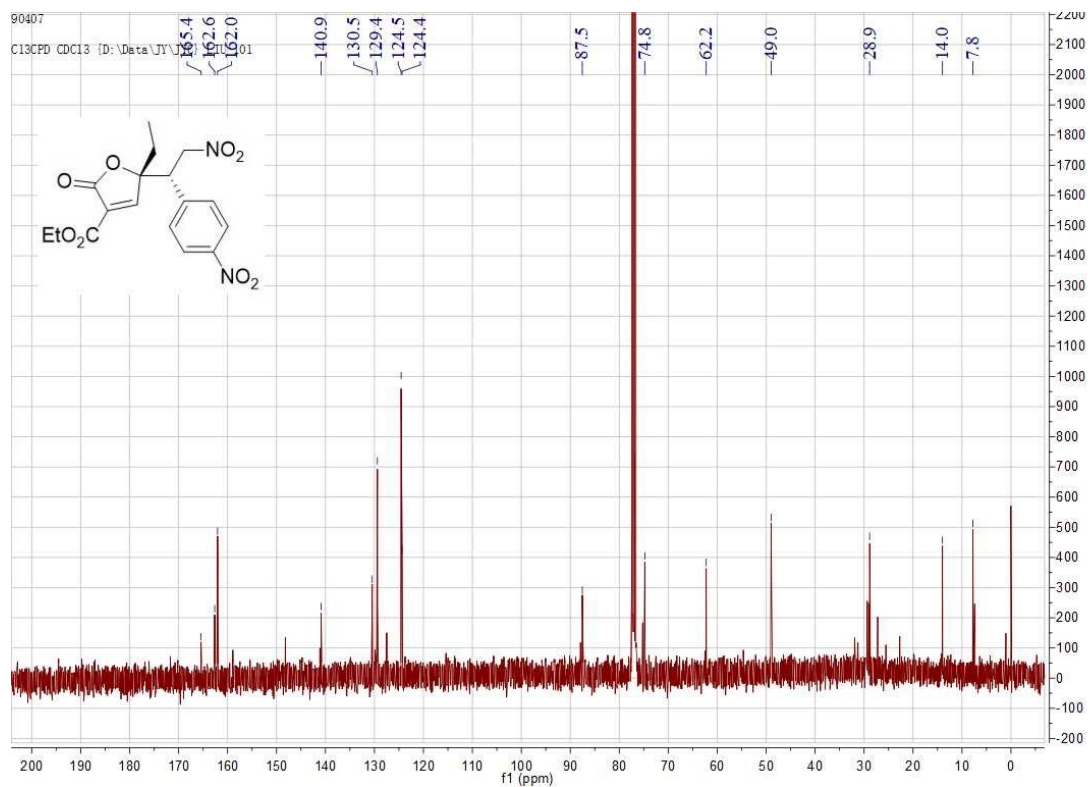

<sup>1</sup>H NMR of product **3ak** (400 MHz, CDCl<sub>3</sub>)

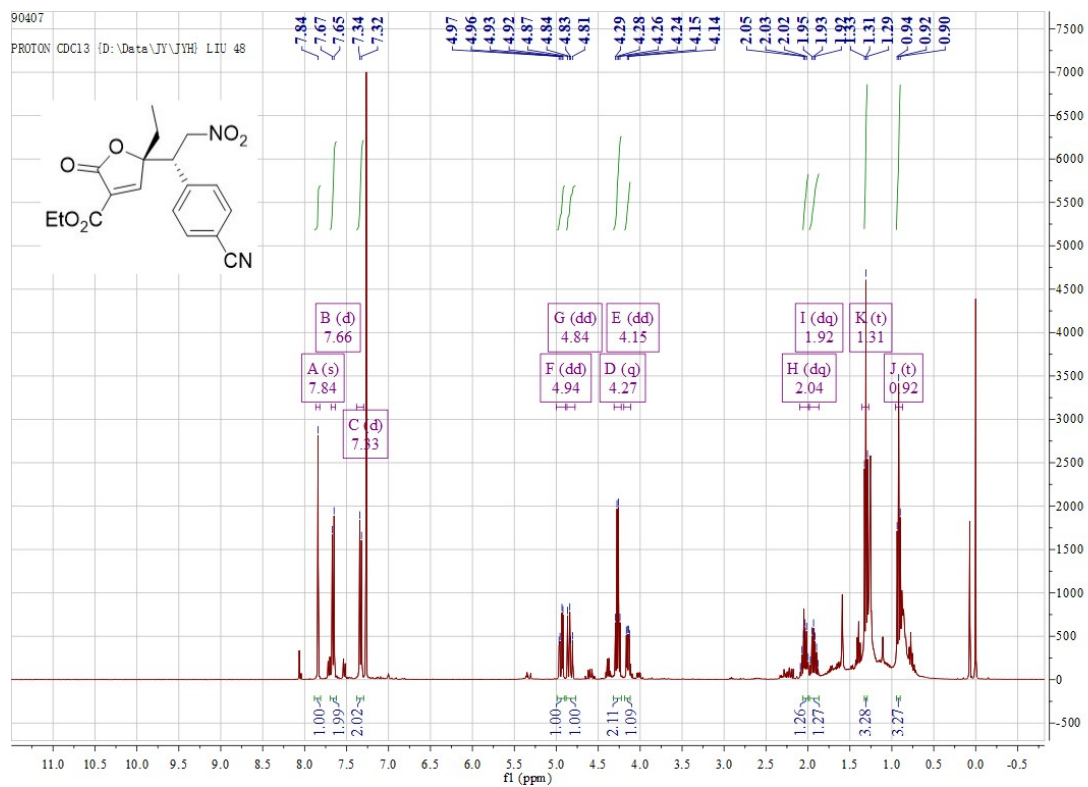

<sup>13</sup>C NMR of product **3ak** (100 MHz, CDCl<sub>3</sub>)



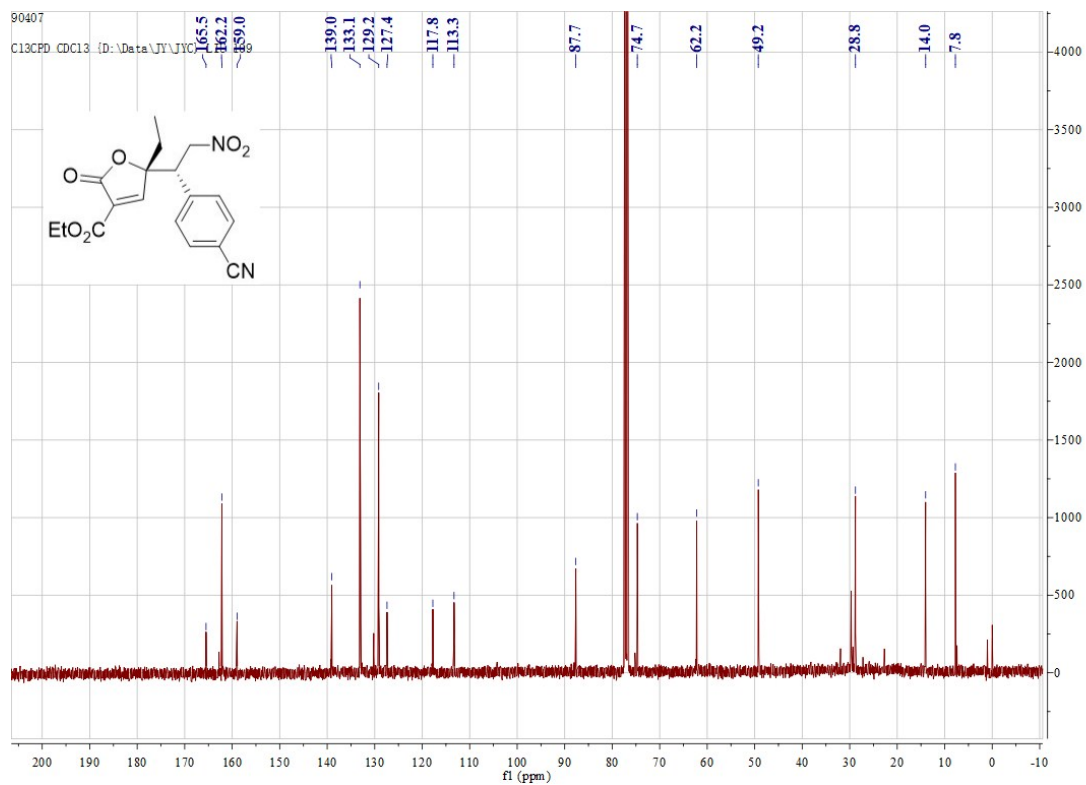

<sup>1</sup>H NMR of product **3a** (400 MHz, CDCl<sub>3</sub>)

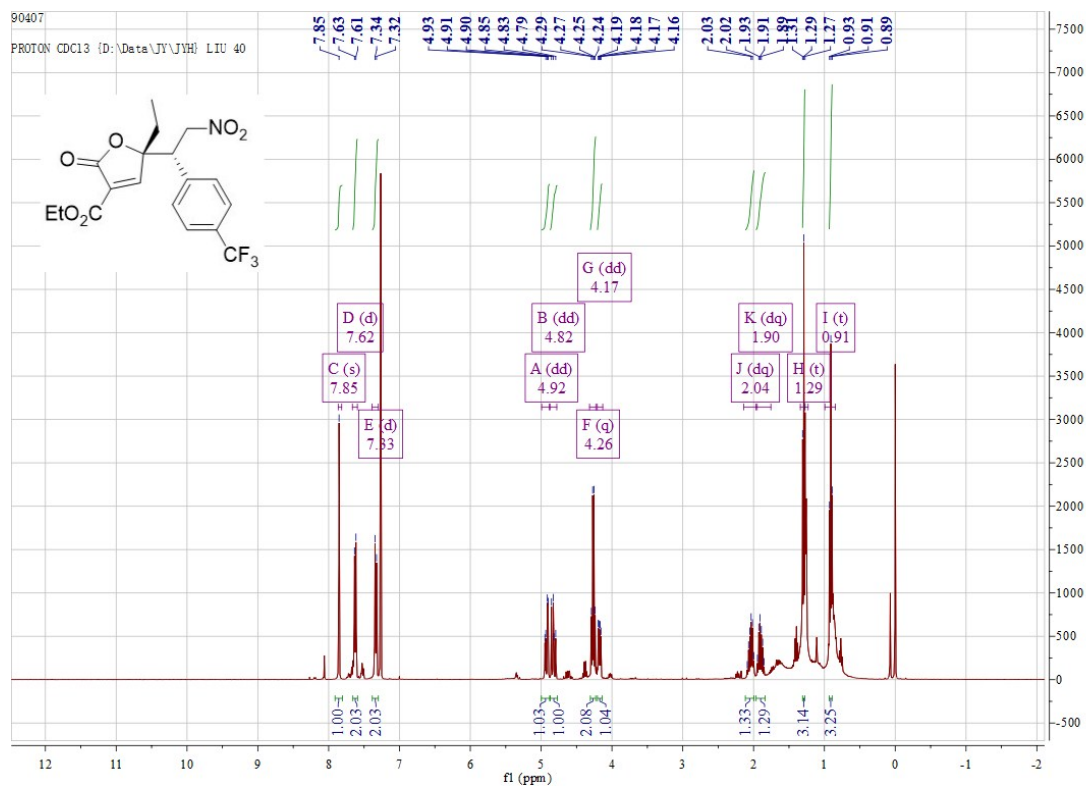

<sup>13</sup>C NMR of product **3a** (100 MHz, CDCl<sub>3</sub>)



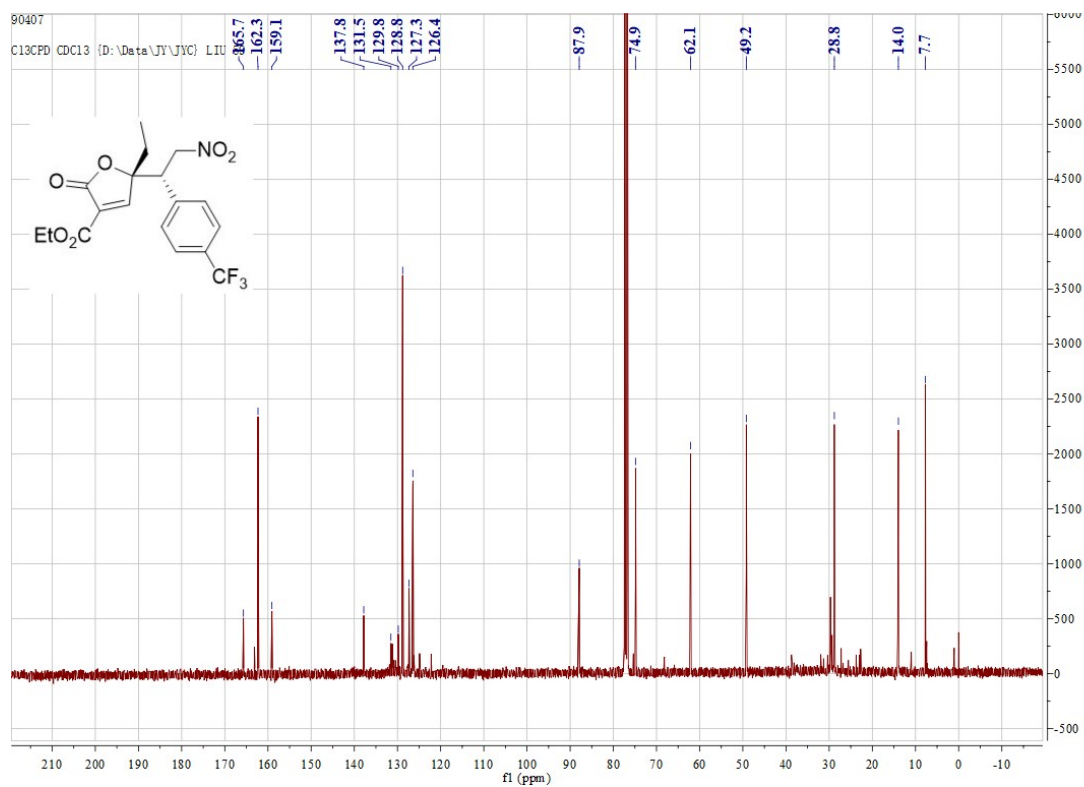

<sup>1</sup>H NMR of product **3am** (400 MHz, CDCl<sub>3</sub>)

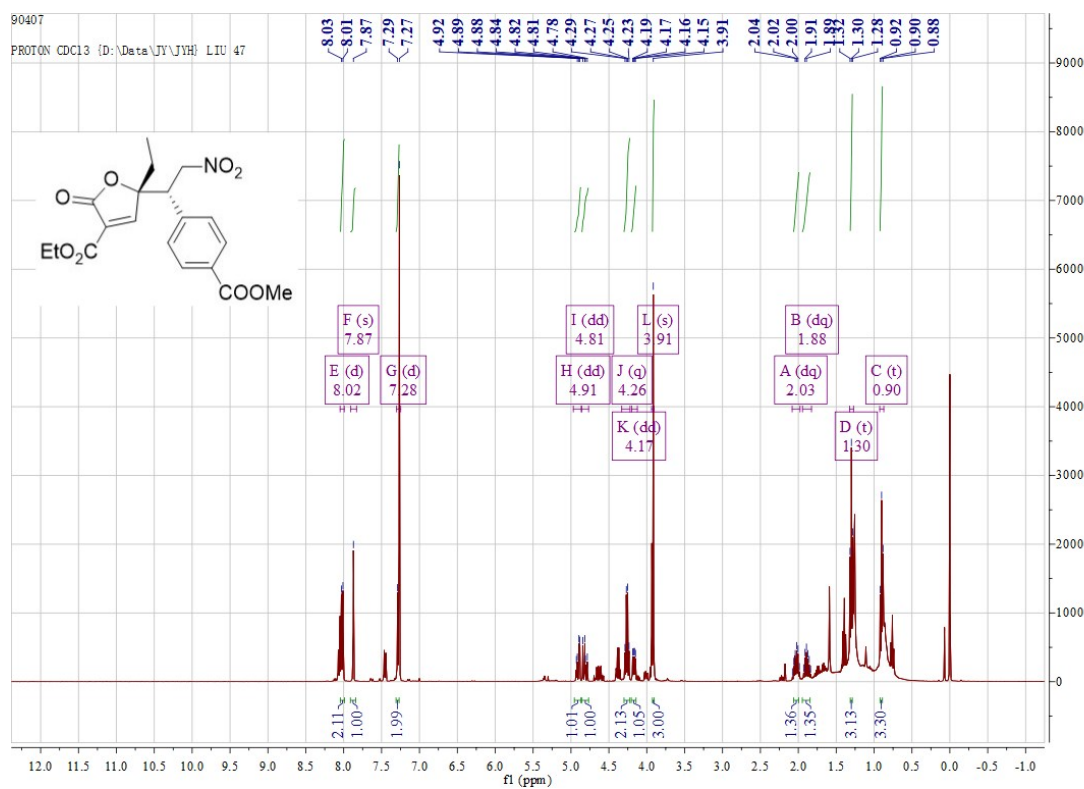

<sup>13</sup>C NMR of product **3am** (100 MHz, CDCl<sub>3</sub>)

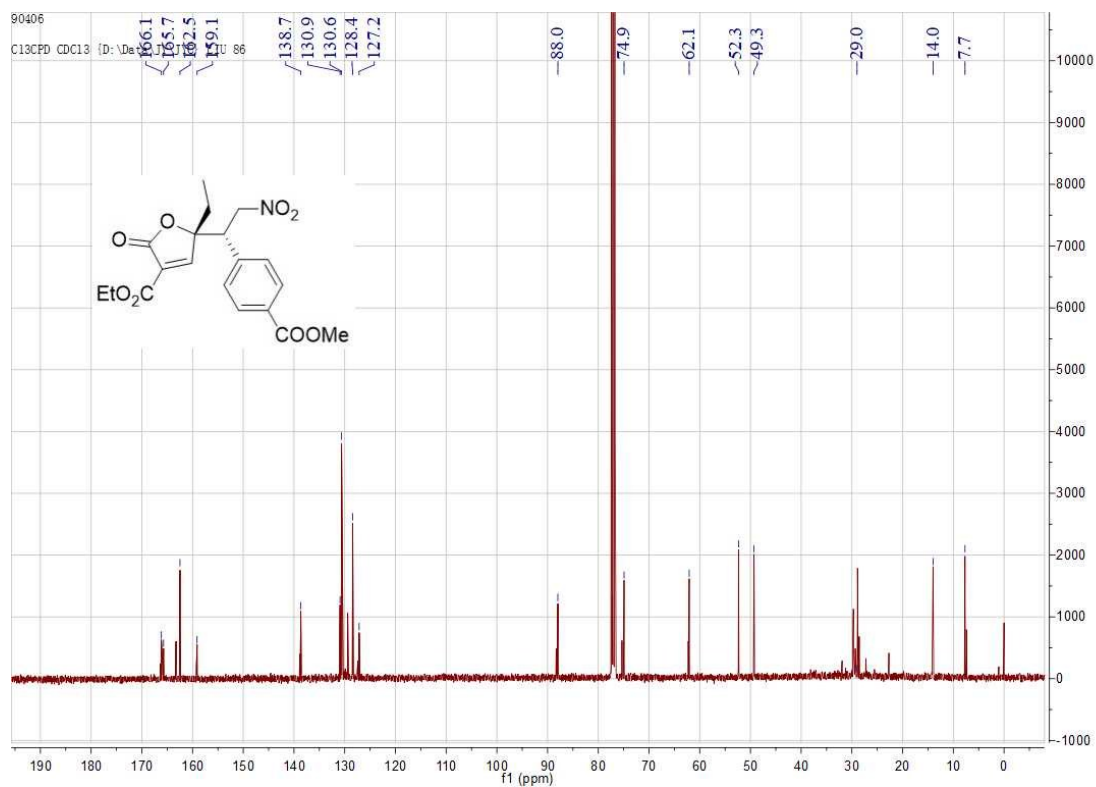

$^1\text{H}$  NMR of product **3an** (400 MHz,  $\text{CDCl}_3$ )

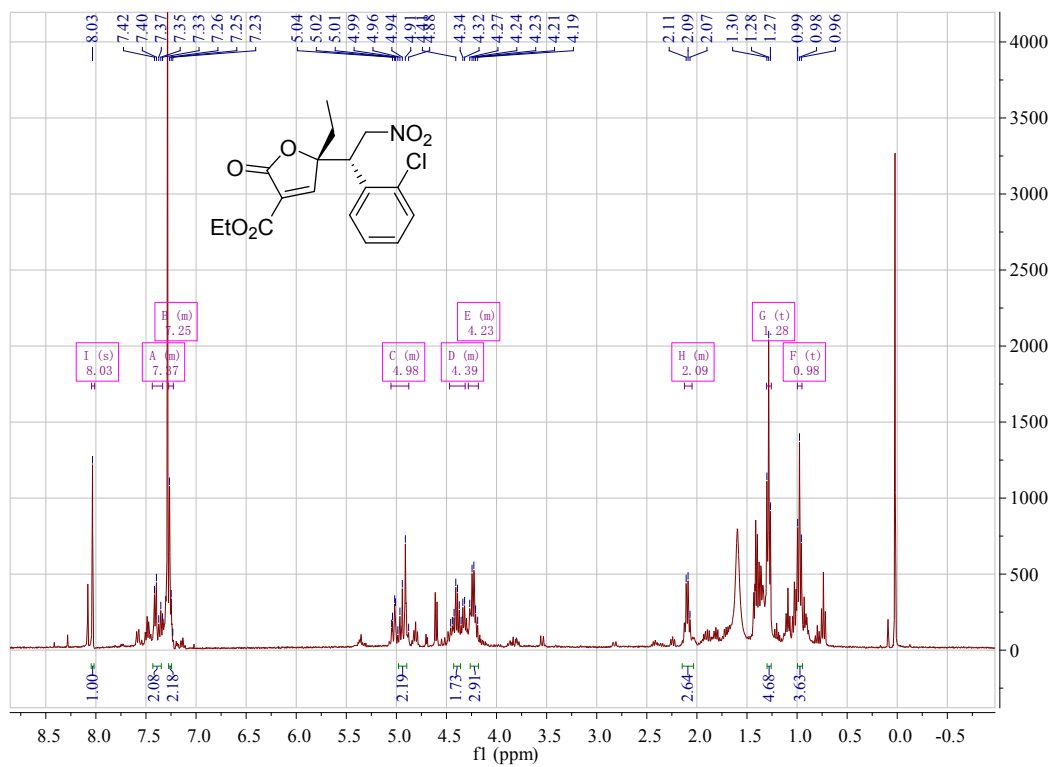

$^{13}\text{C}$  NMR of product **3an** (100 MHz,  $\text{CDCl}_3$ )

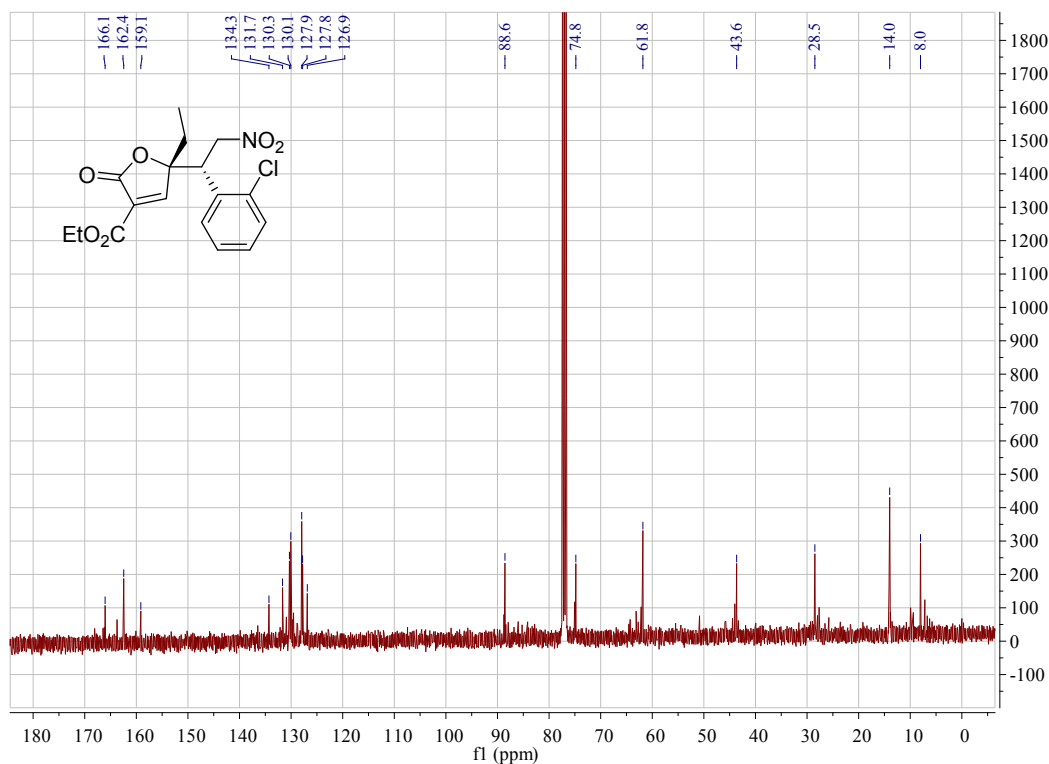

$^1\text{H}$  NMR of product **3ao** (400 MHz,  $\text{CDCl}_3$ )

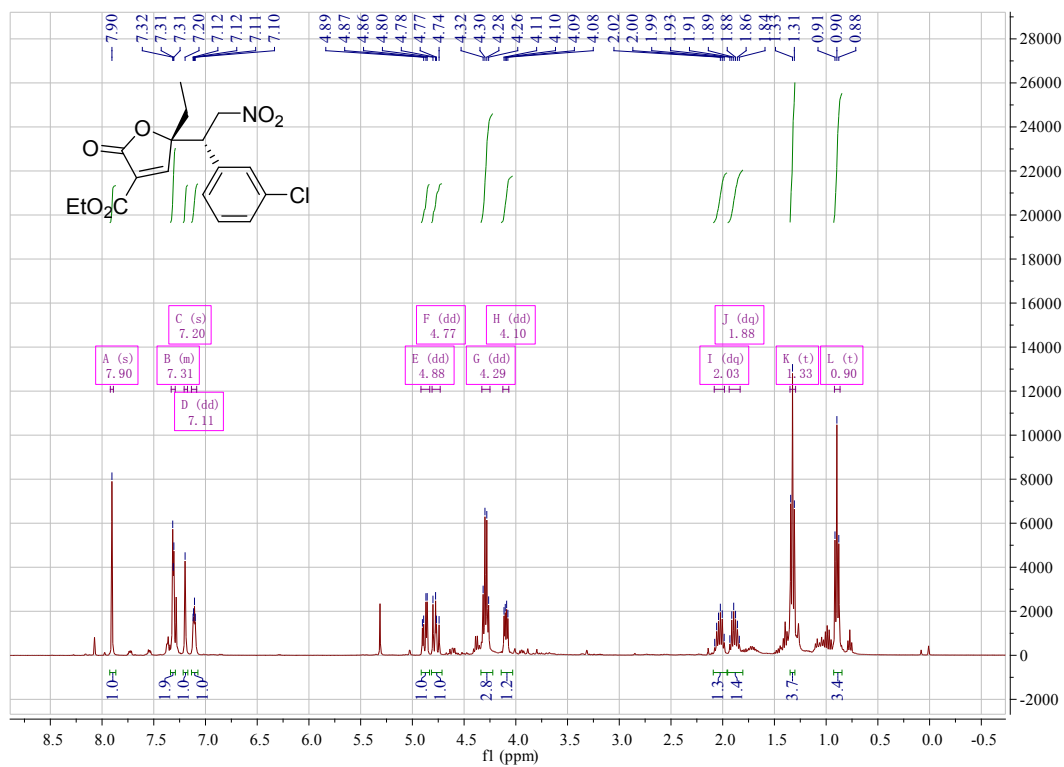

$^{13}\text{C}$  NMR of product **3ao** (100 MHz,  $\text{CDCl}_3$ )

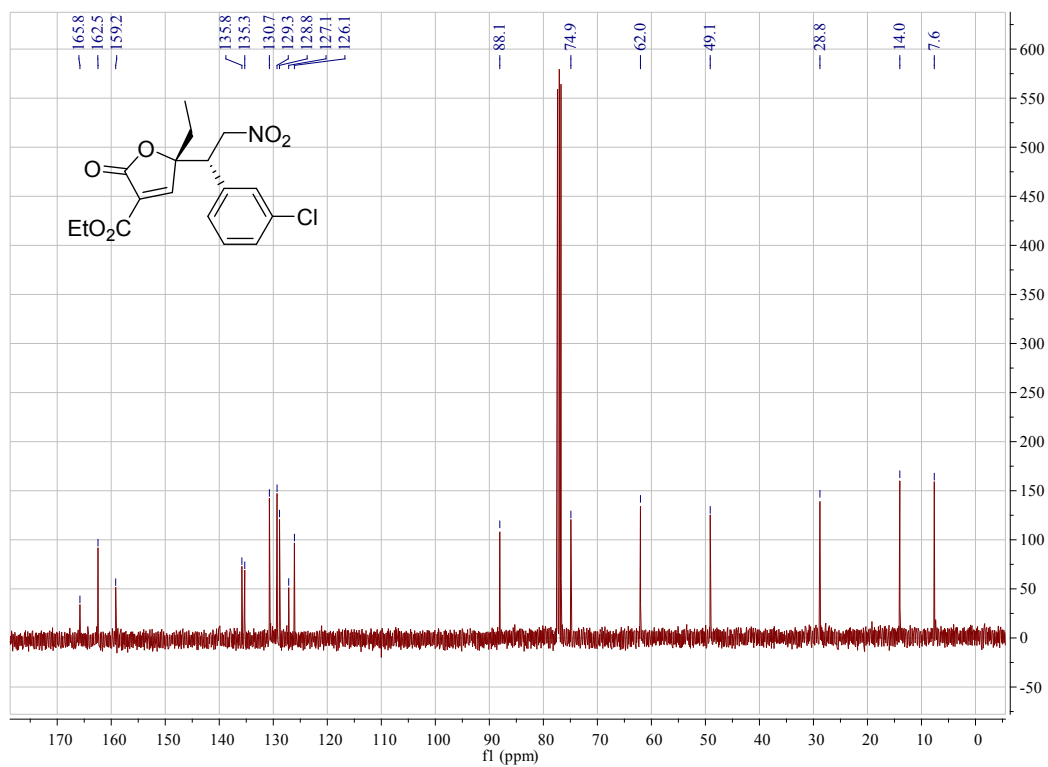

$^1\text{H}$  NMR of product **3ap** (400 MHz,  $\text{CDCl}_3$ )

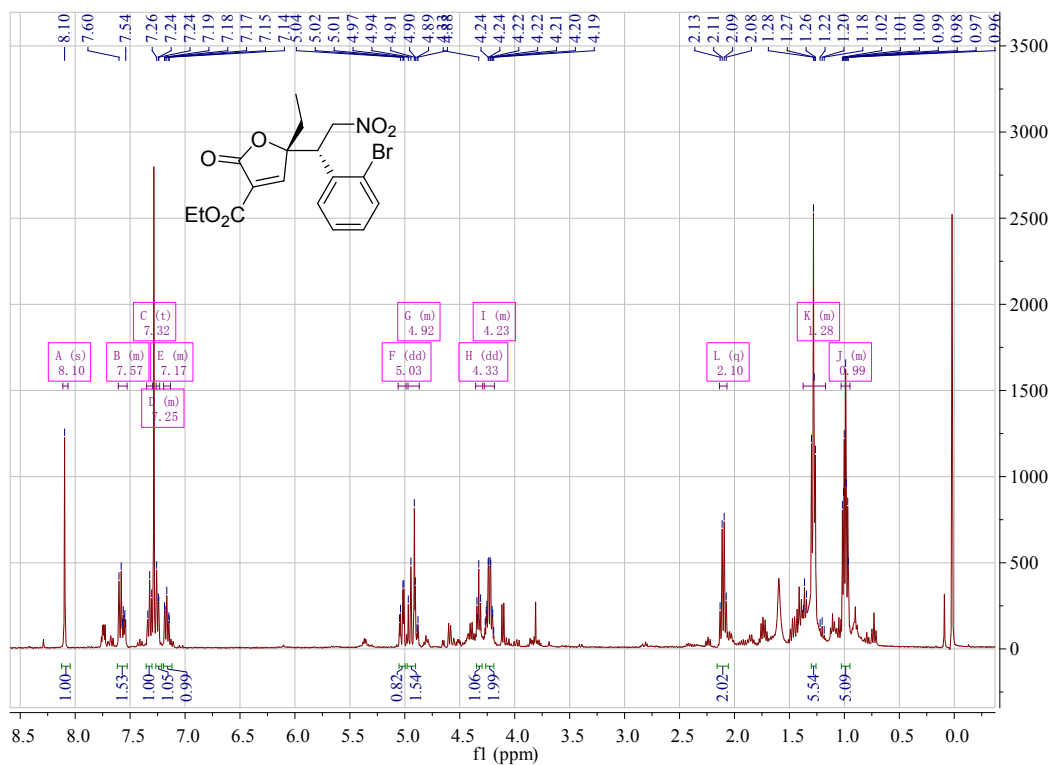

$^{13}\text{C}$  NMR of product **3ap** (100 MHz,  $\text{CDCl}_3$ )

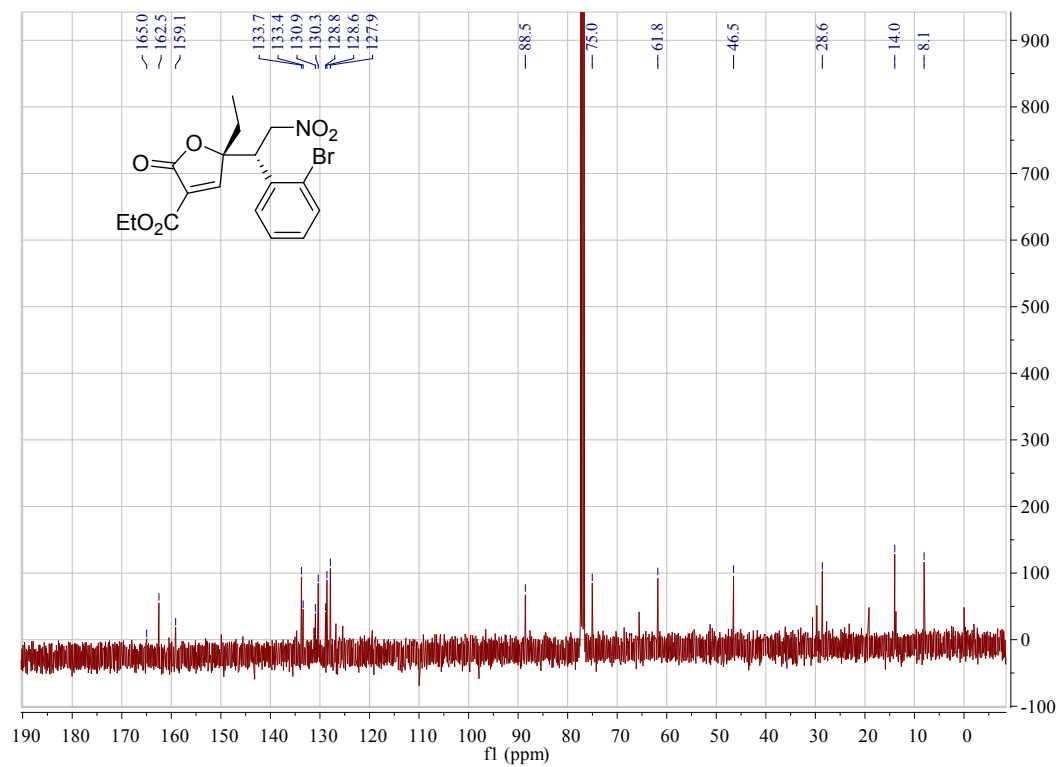

<sup>1</sup>H NMR of product 3aq (400 MHz, CDCl<sub>3</sub>)

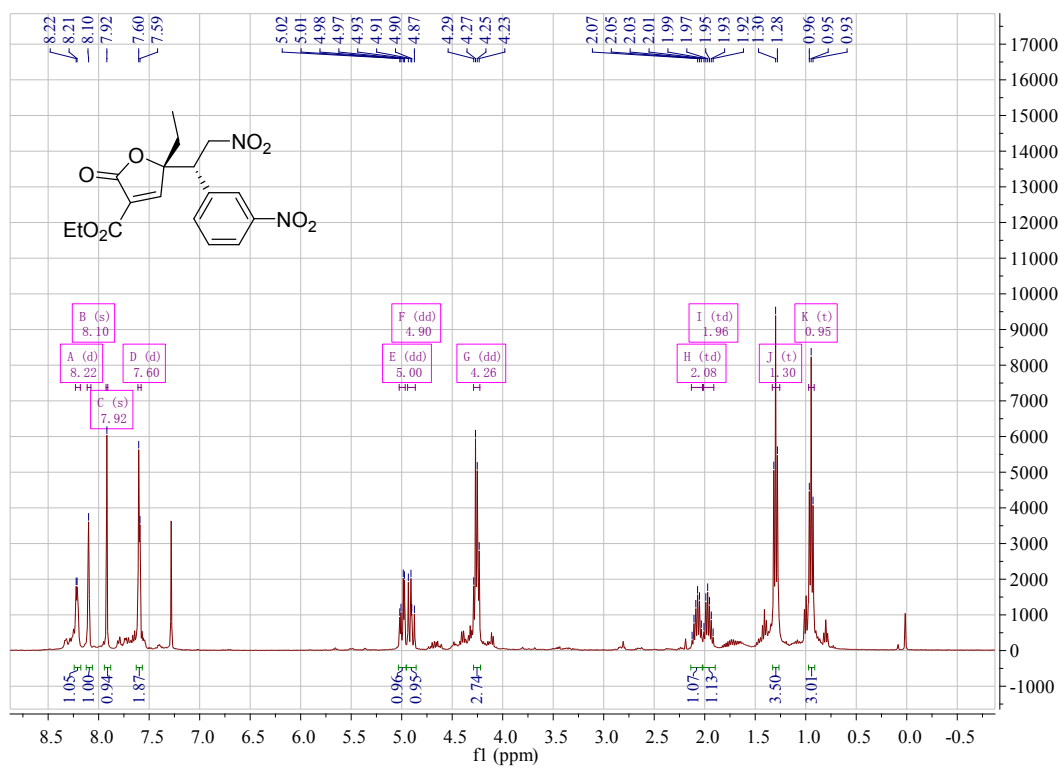

<sup>13</sup>C NMR of product 3aq (100 MHz, CDCl<sub>3</sub>)

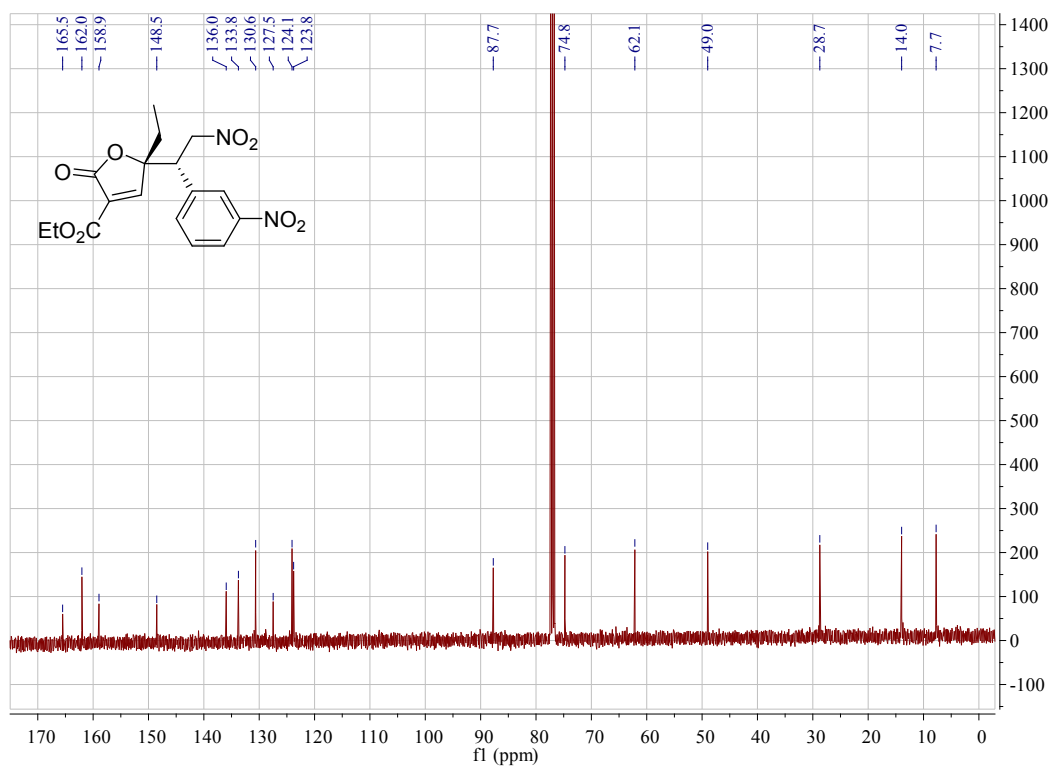

<sup>1</sup>H NMR of product **3ar** (400 MHz, CDCl<sub>3</sub>)

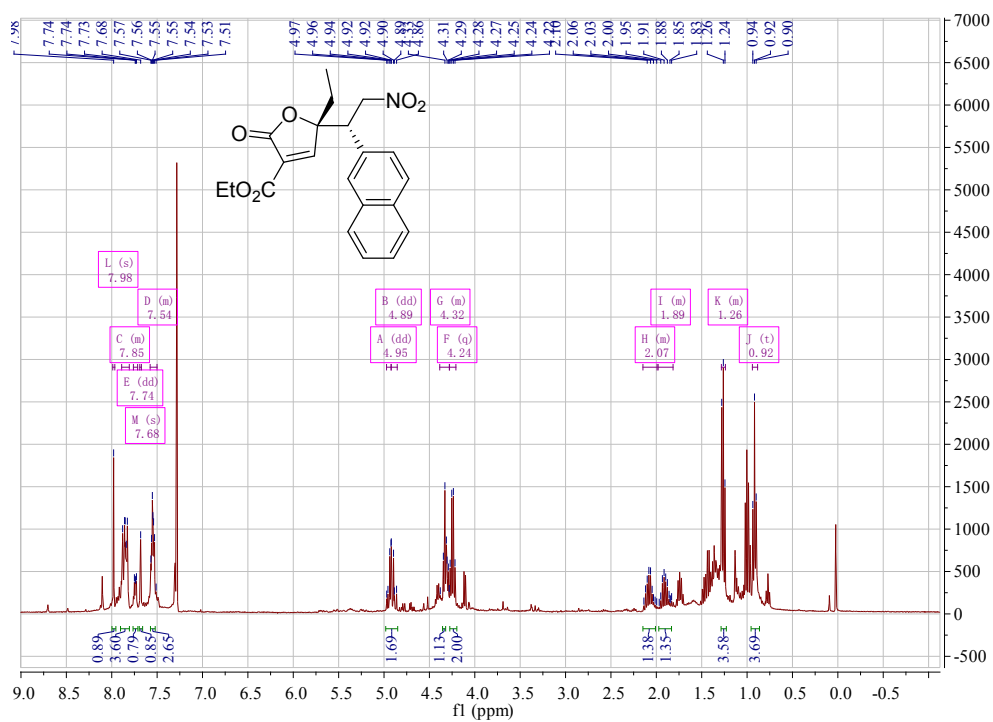

<sup>13</sup>C NMR of product 3ar (100 MHz, CDCl<sub>3</sub>)

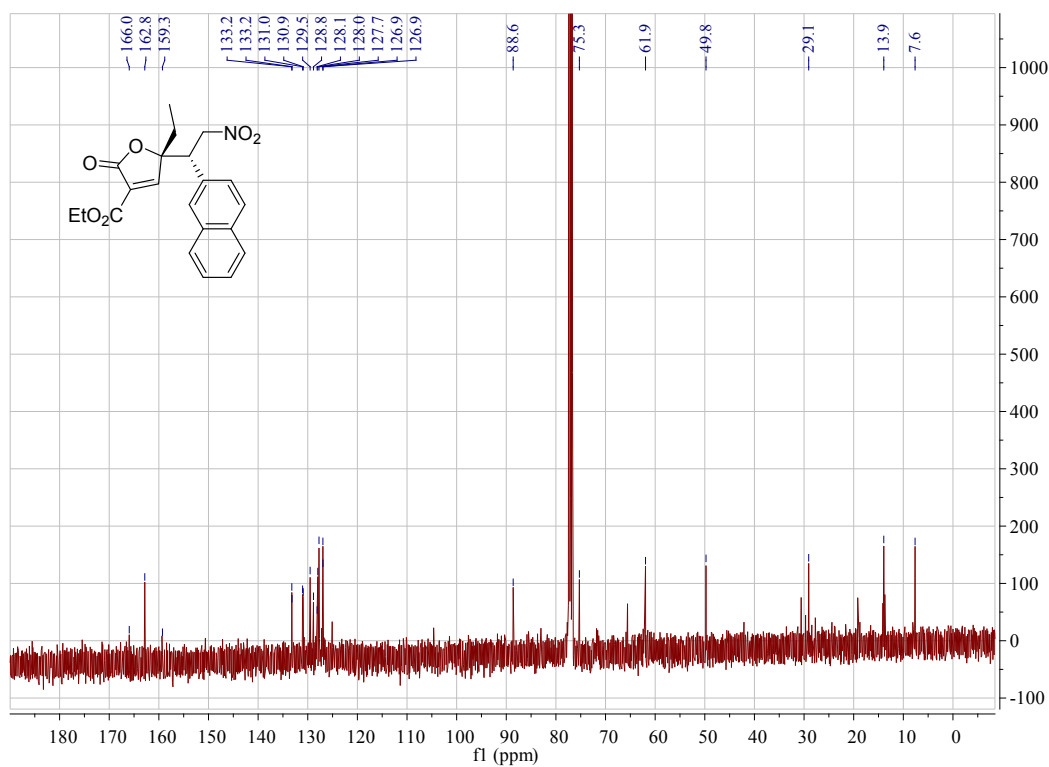

<sup>1</sup>H NMR of product 3as (400 MHz, CDCl<sub>3</sub>)

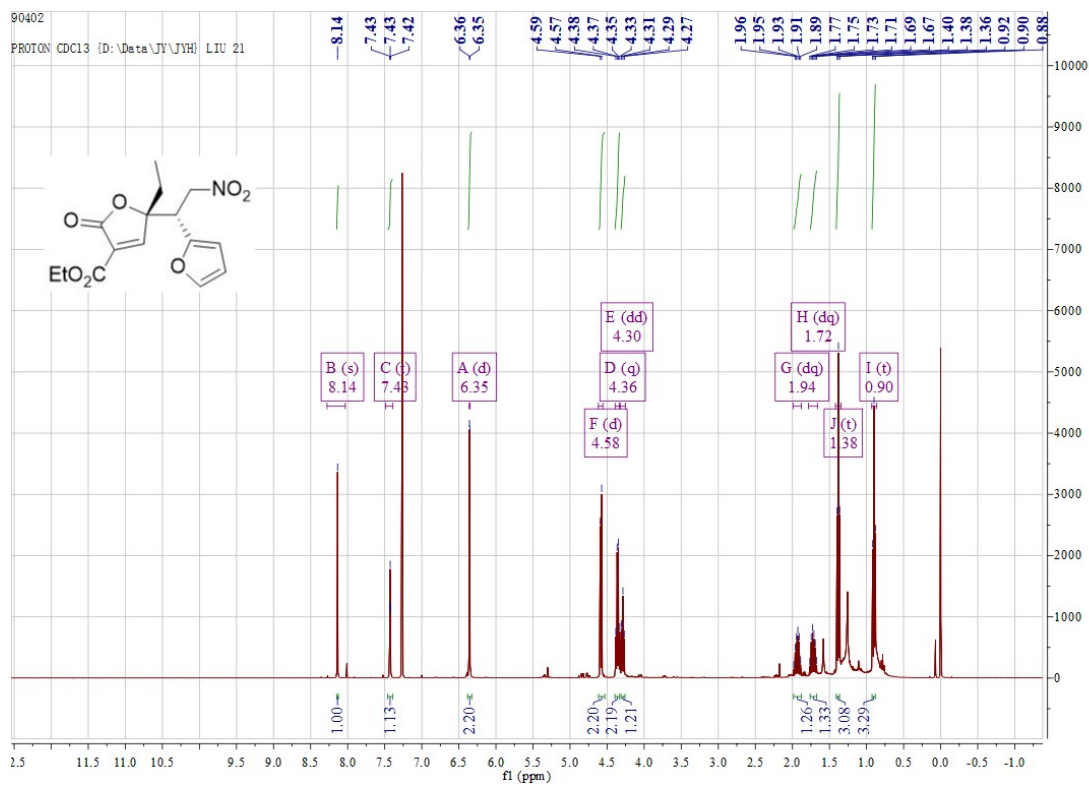

<sup>13</sup>C NMR of product **3as**(100 MHz, CDCl<sub>3</sub>)

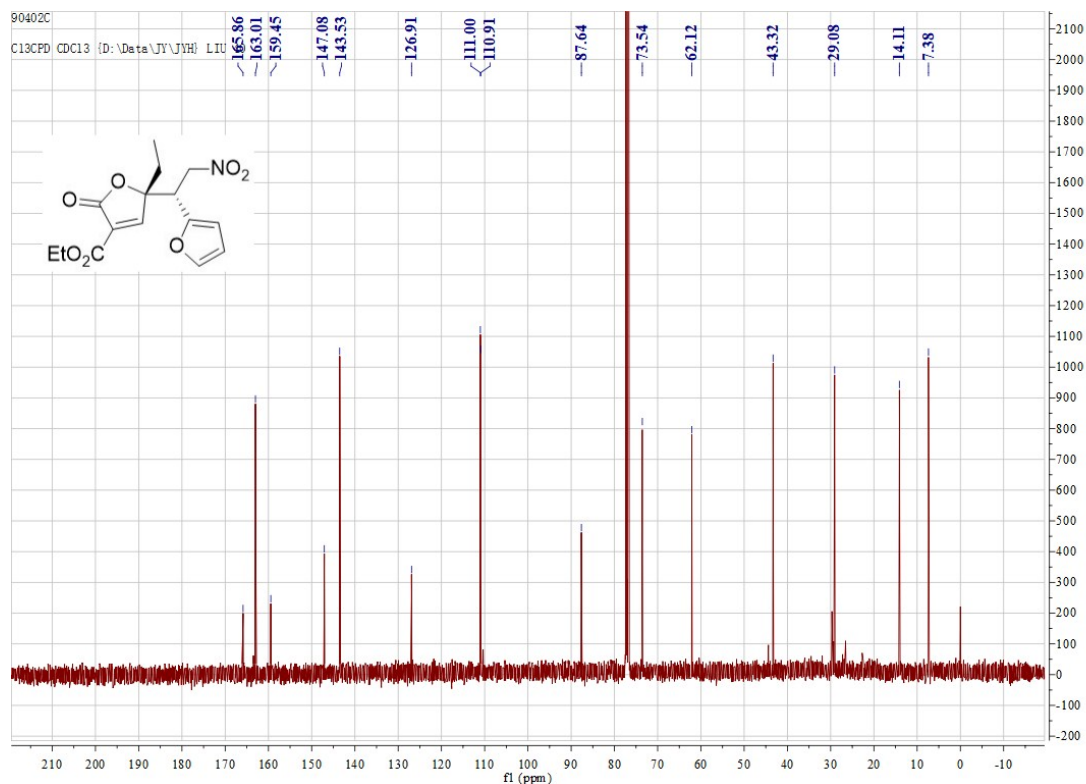

<sup>1</sup>H NMR of product **3at** (400 MHz, CDCl<sub>3</sub>)



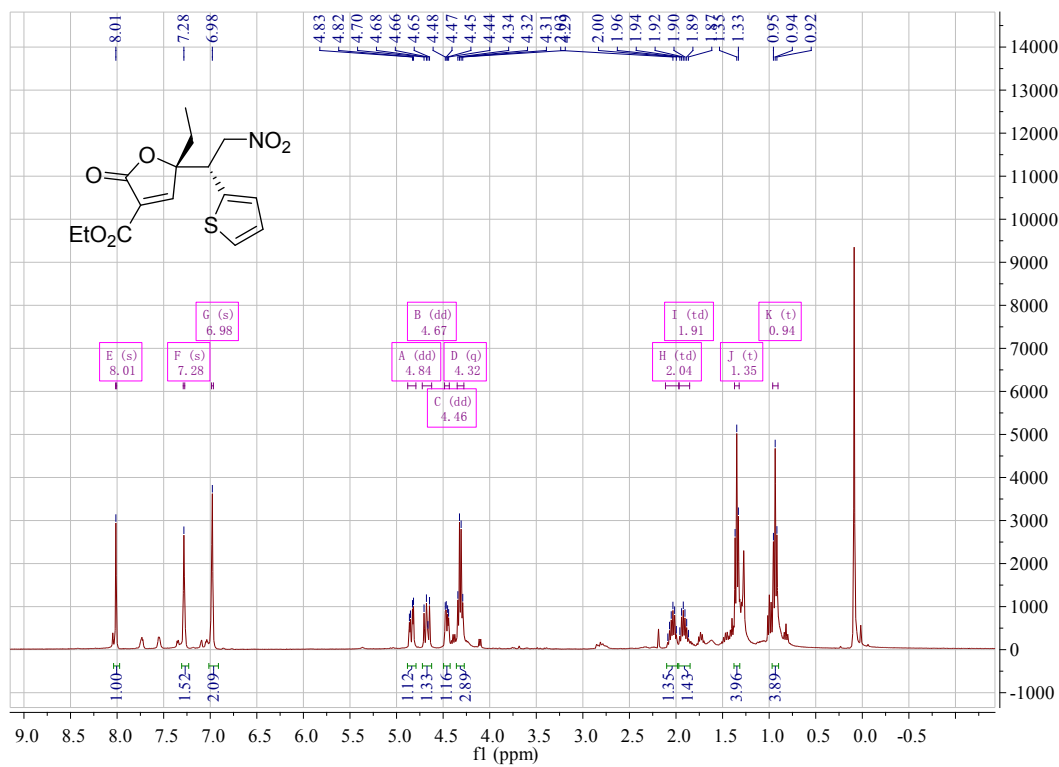

<sup>13</sup>C NMR of product 3at(100 MHz, CDCl<sub>3</sub>)

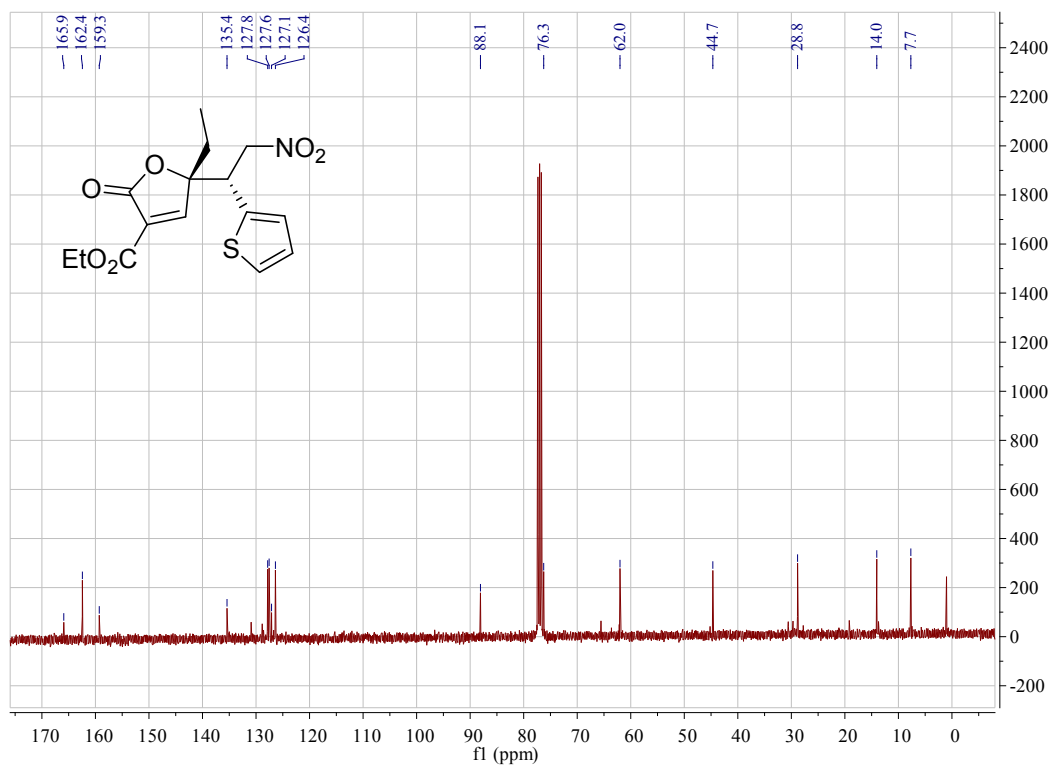

<sup>1</sup>H NMR of product 3au (400 MHz, CDCl<sub>3</sub>)

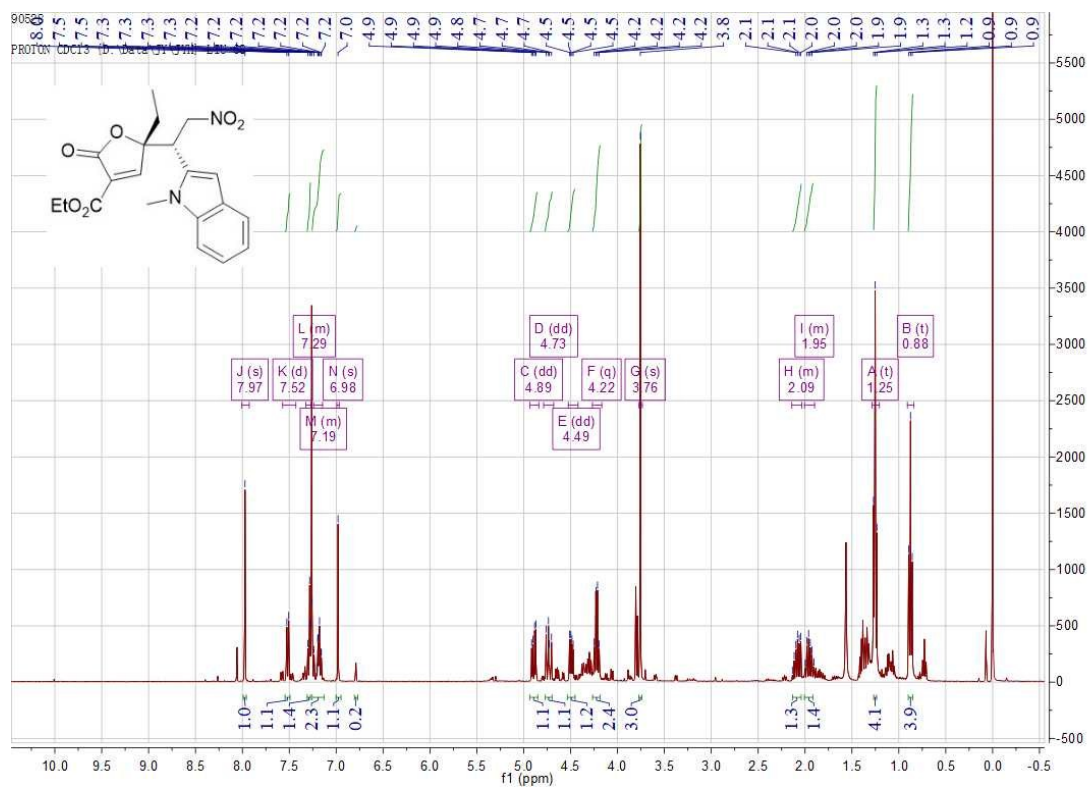

<sup>13</sup>C NMR of product **3au** (100 MHz, CDCl<sub>3</sub>)

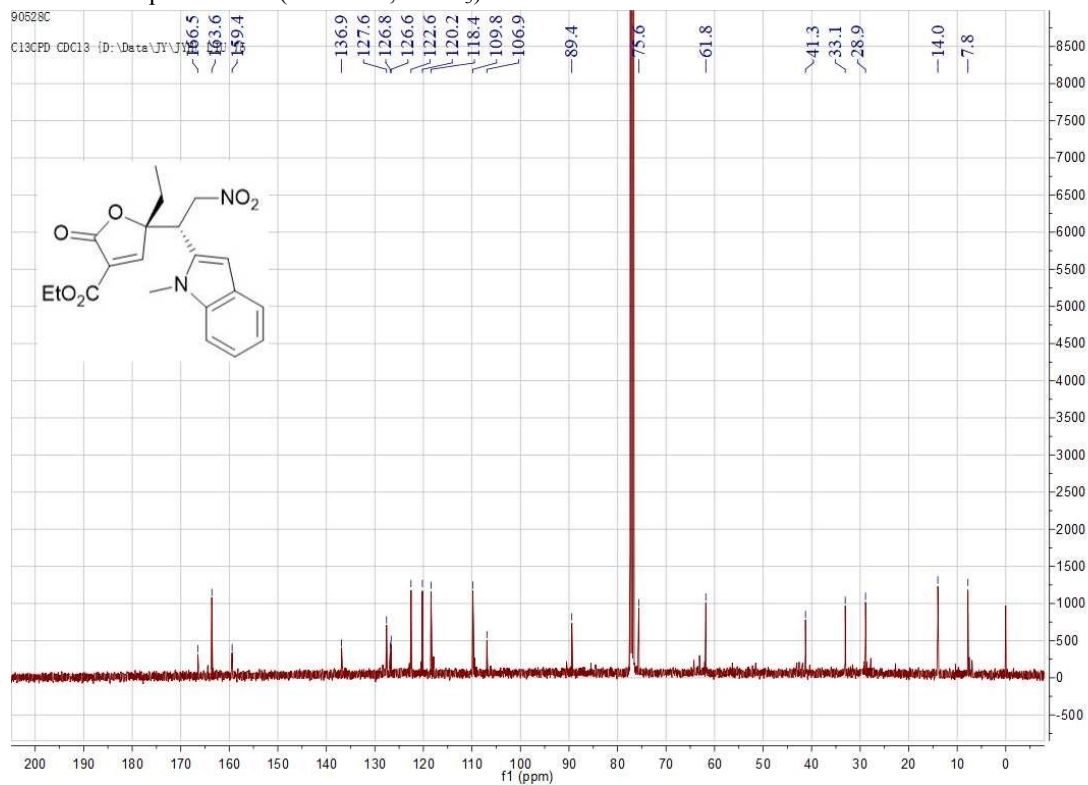

<sup>1</sup>H NMR of product **3av** (400 MHz, CDCl<sub>3</sub>)



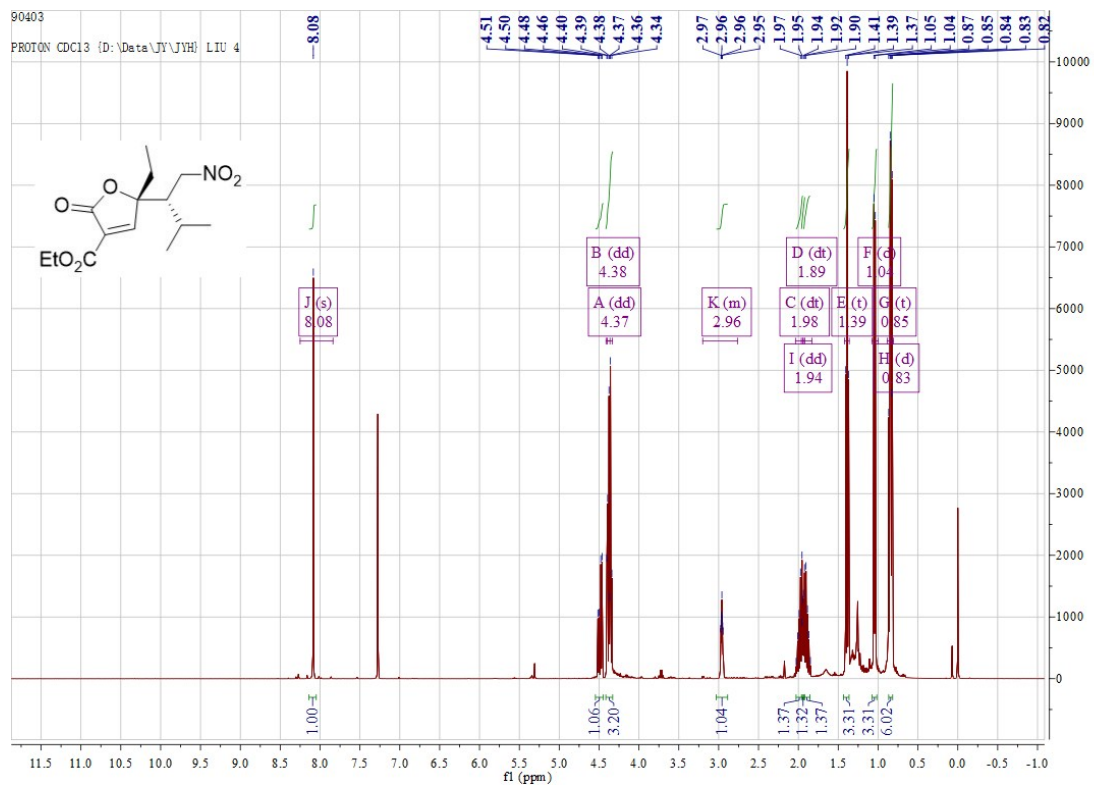

<sup>13</sup>C NMR of product **3aw**(100 MHz, CDCl<sub>3</sub>)

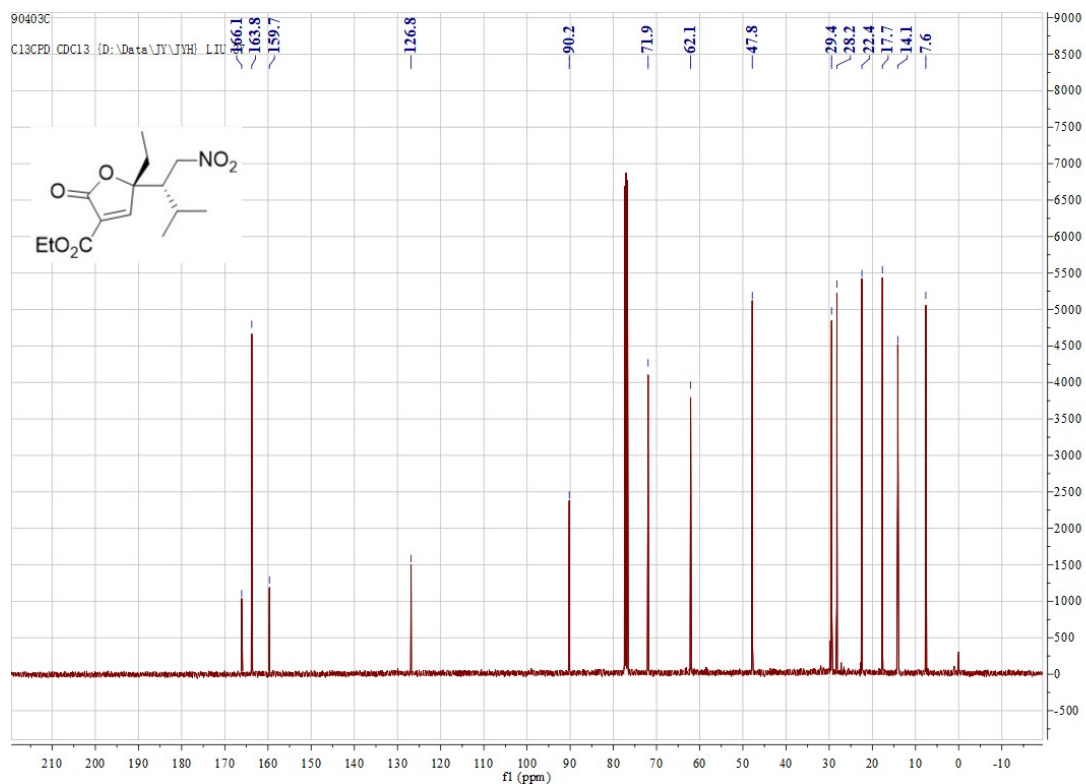

<sup>1</sup>H NMR of product **3ax**(400 MHz, CDCl<sub>3</sub>)

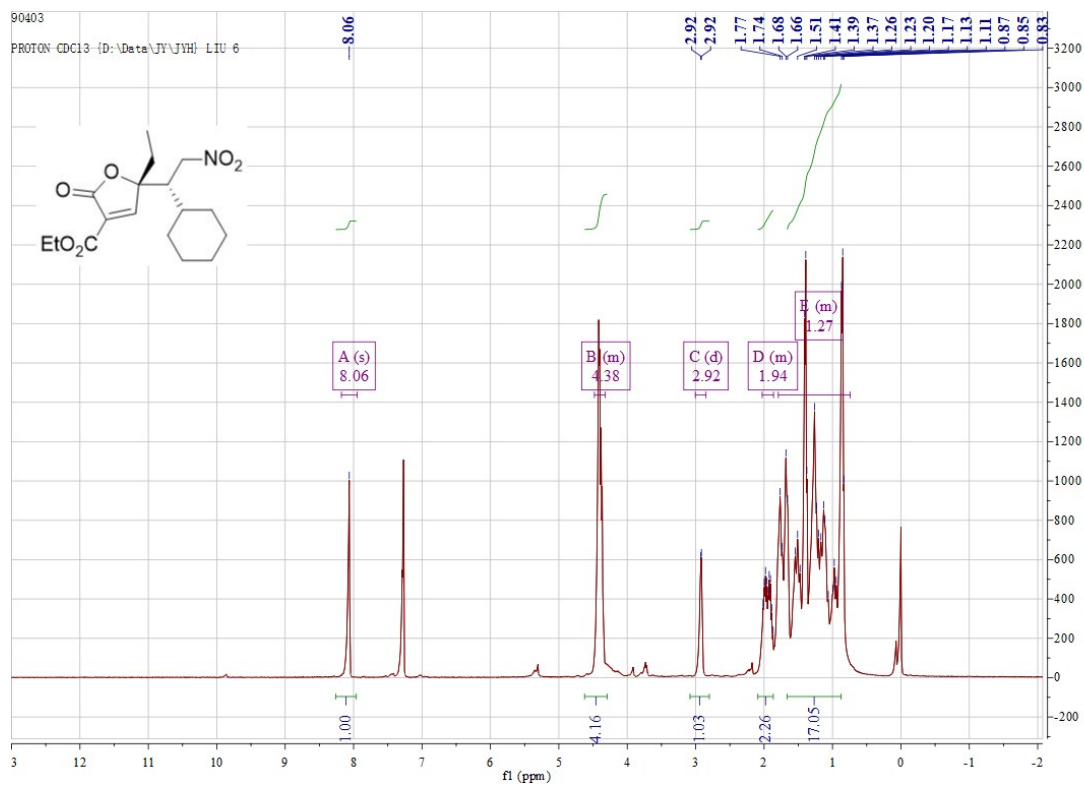

<sup>13</sup>C NMR of product **3ax**(100 MHz, CDCl<sub>3</sub>)

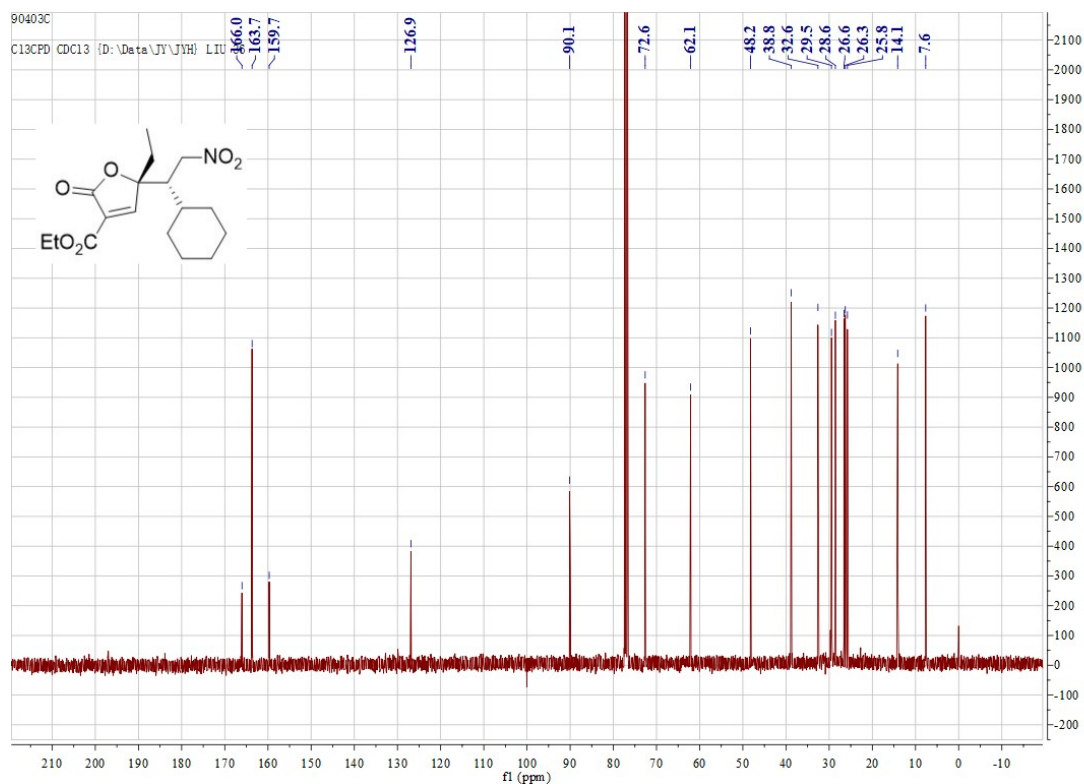

<sup>1</sup>H NMR of product **3ay**(400 MHz, CDCl<sub>3</sub>)

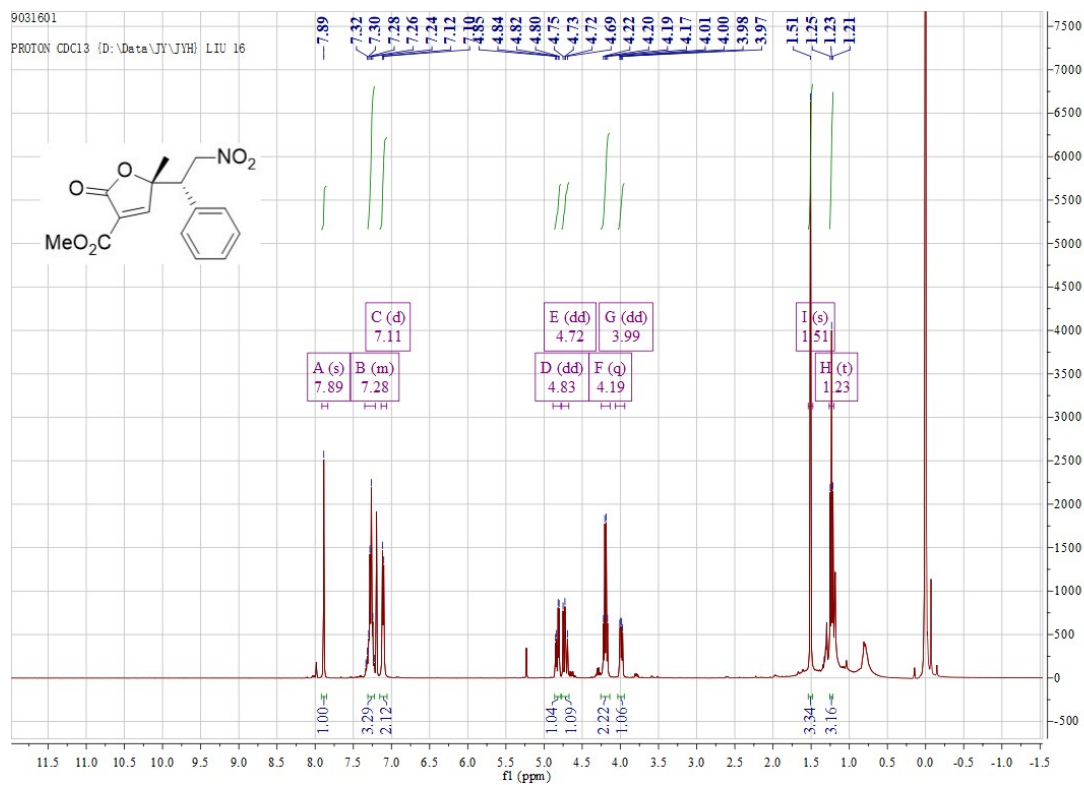

<sup>13</sup>C NMR of product **3ay**(100 MHz, CDCl<sub>3</sub>)

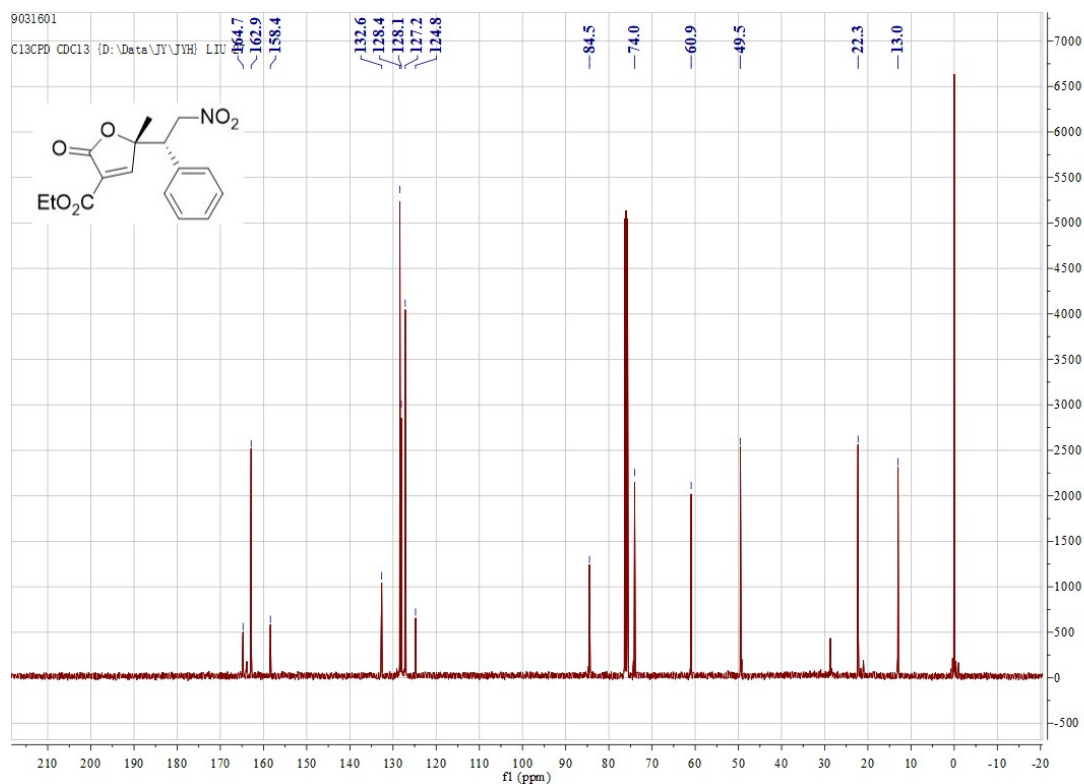

<sup>1</sup>H NMR of product **3az**(400 MHz, CDCl<sub>3</sub>)



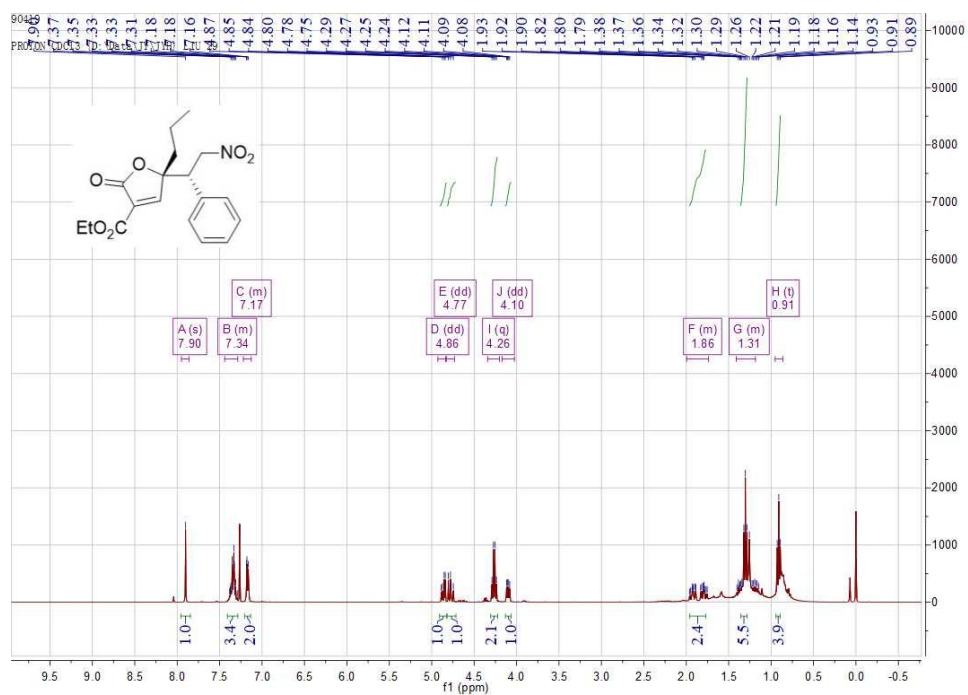

$^{13}\text{C}$  NMR of product **3az** (100 MHz,  $\text{CDCl}_3$ )

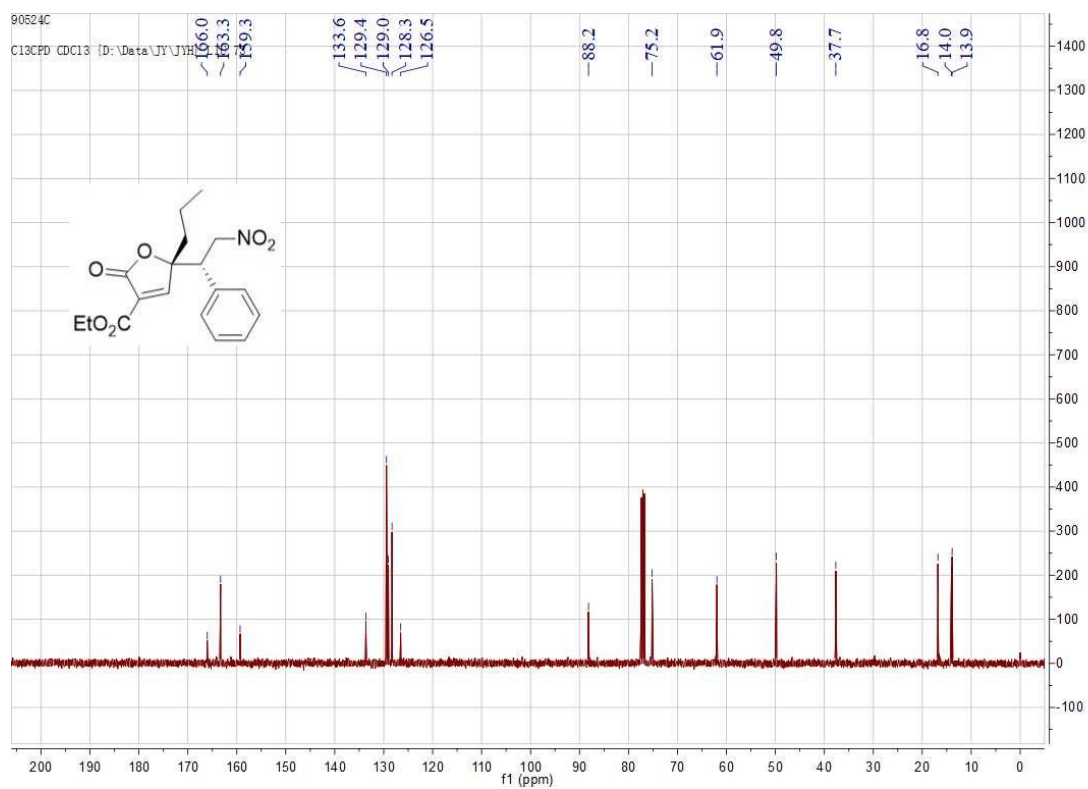

$^1\text{H}$  NMR of product **3ba** (400 MHz,  $\text{CDCl}_3$ )

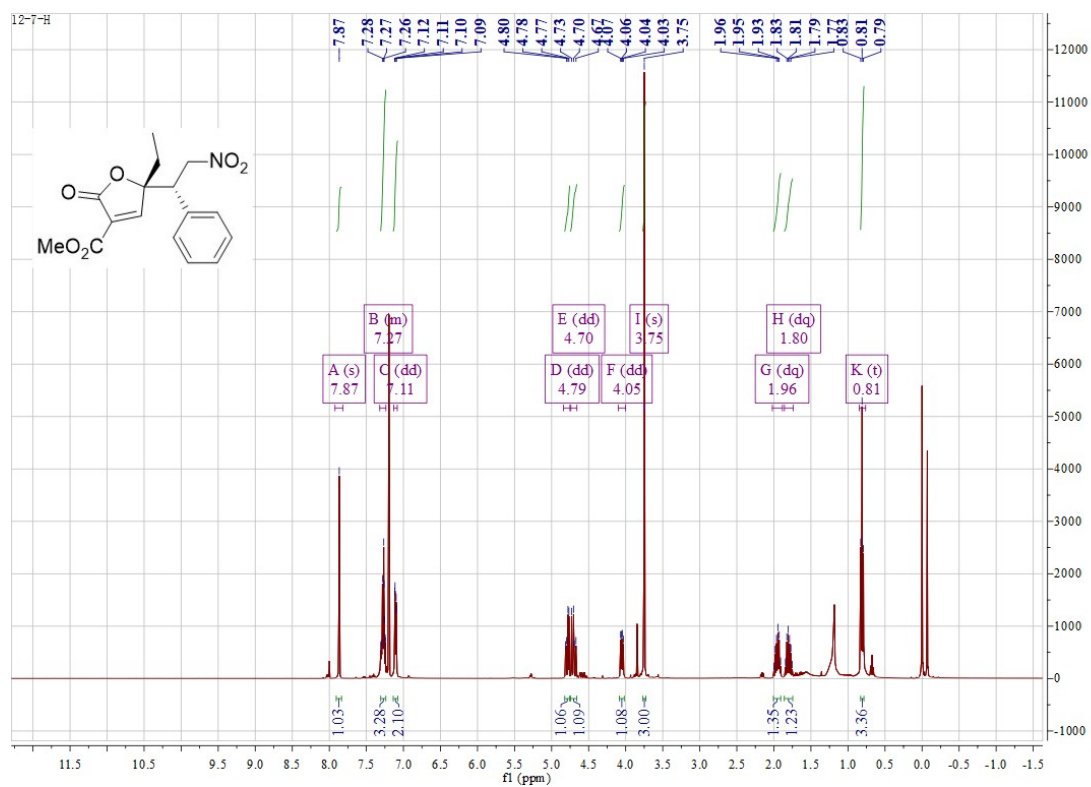

$^{13}\text{C}$  NMR of product **3ba** (100 MHz,  $\text{CDCl}_3$ )

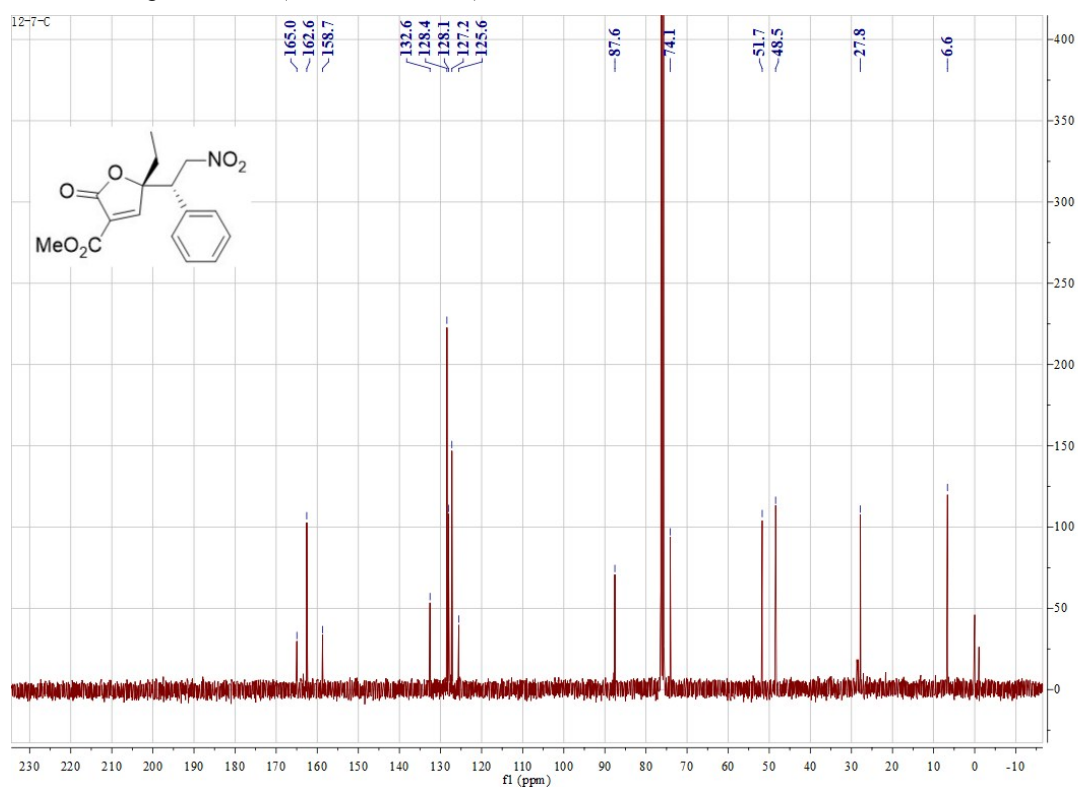

$^1\text{H}$  NMR of product **4aa** (400 MHz,  $\text{CDCl}_3$ )



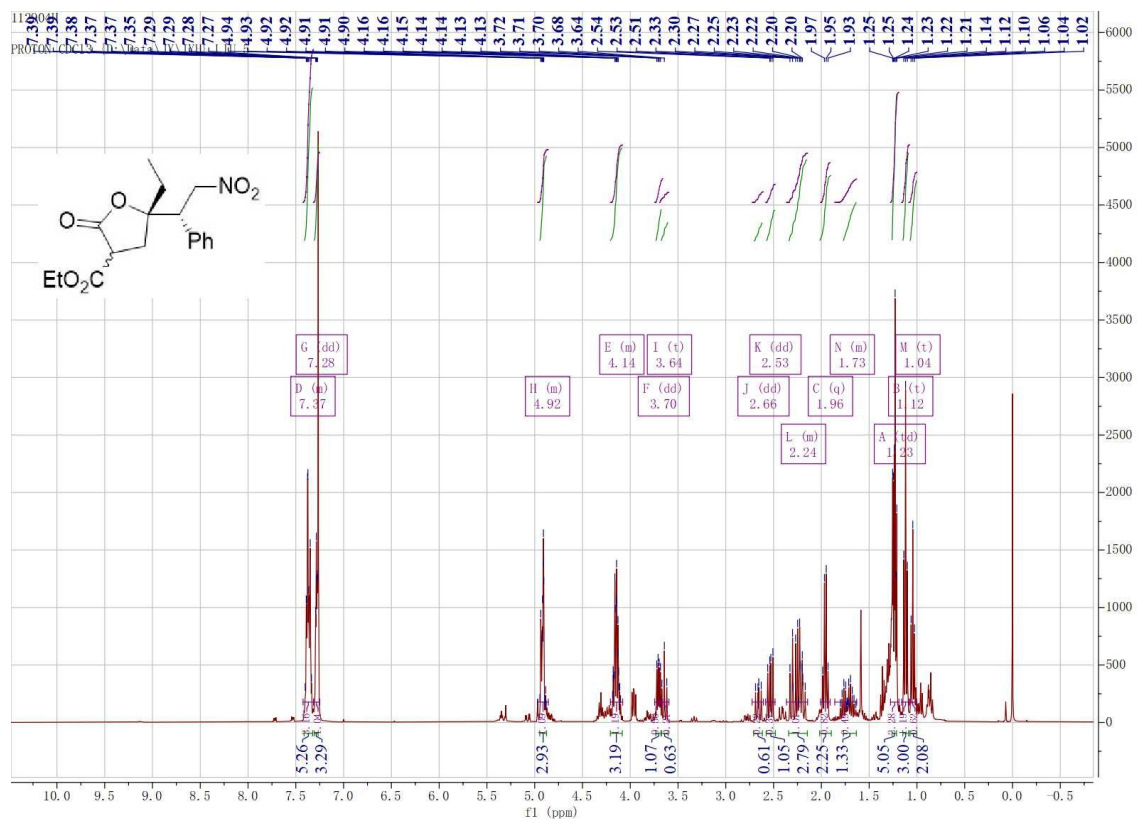

**<sup>13</sup>C NMR of product 4aa (100 MHz, CDCl<sub>3</sub>)**

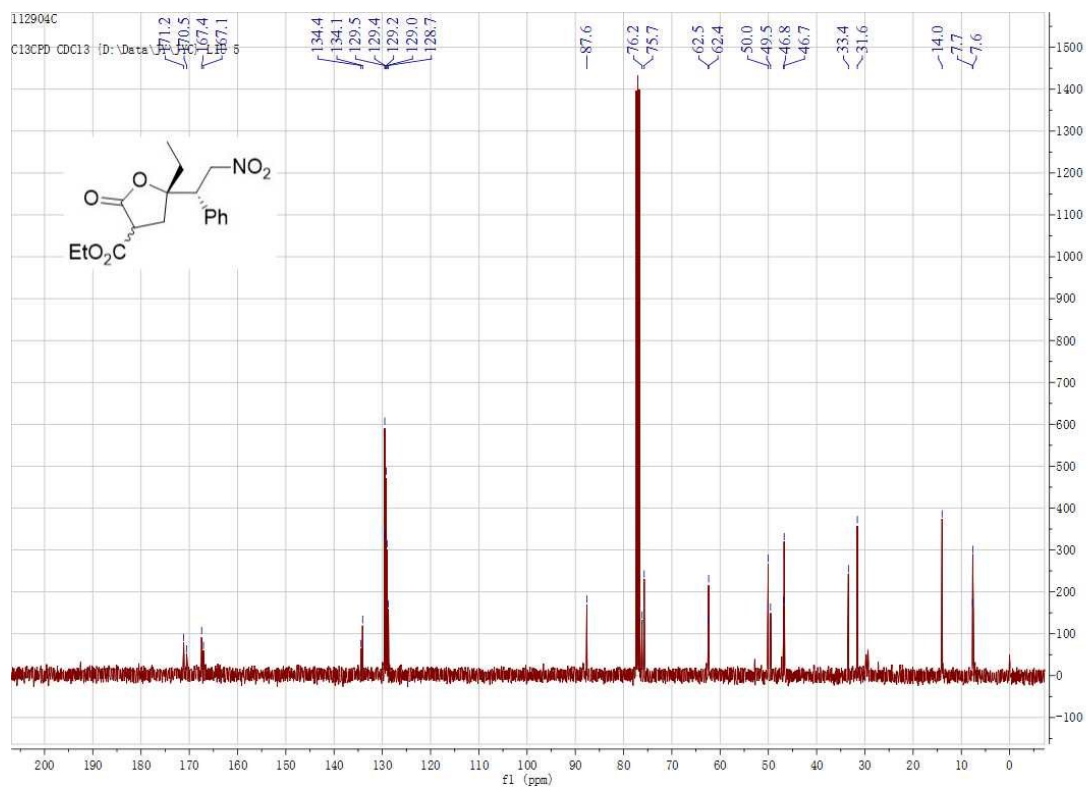

## 6. HPLC data for Product 3aa-3ba

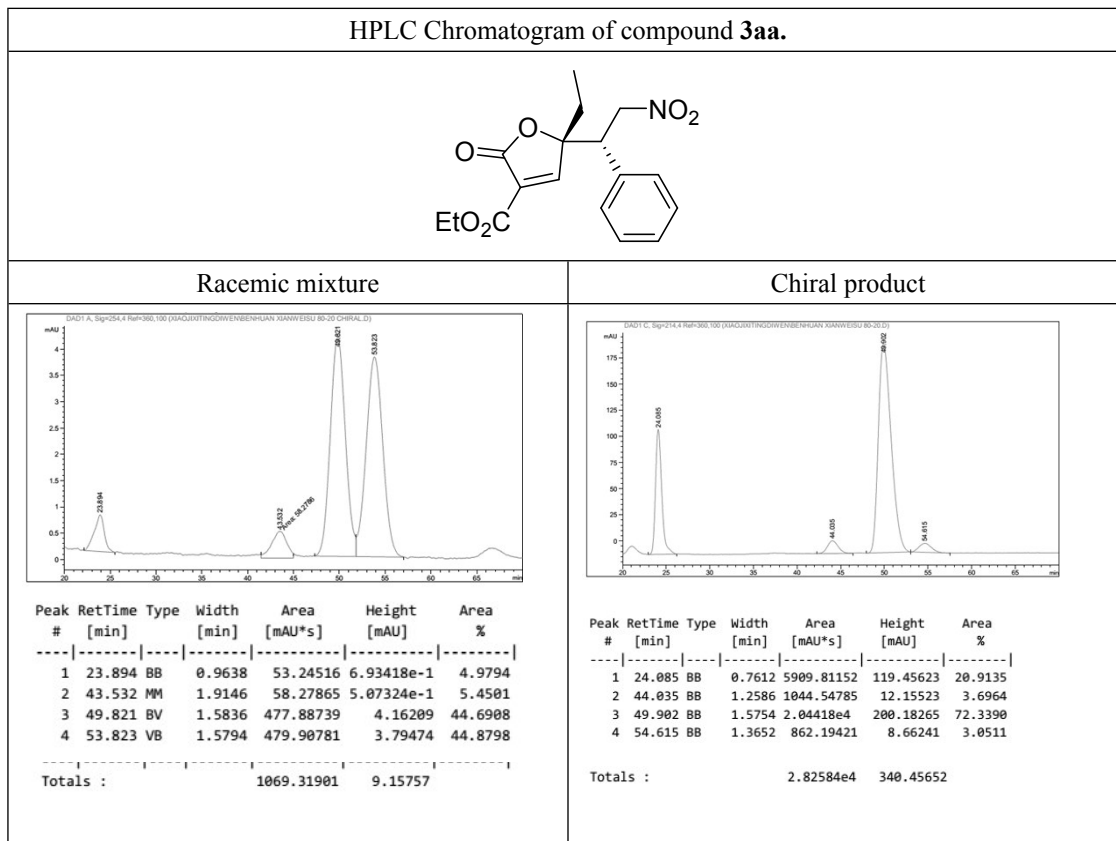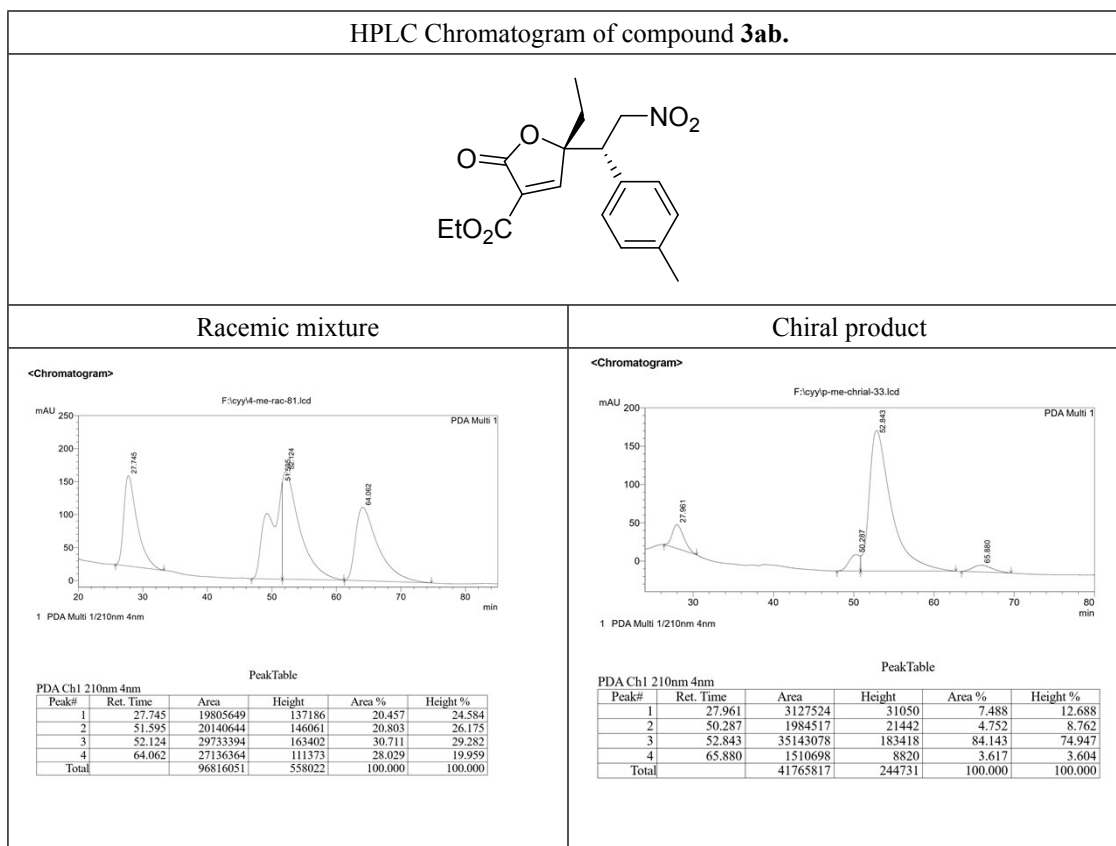

### HPLC Chromatogram of compound 3ac.

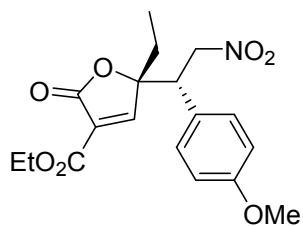

#### Racemic mixture

<Chromatogram>

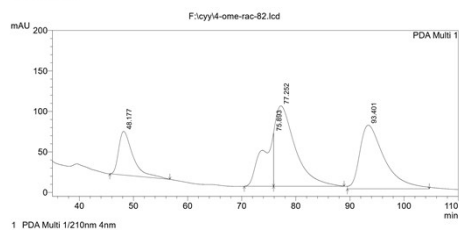

| Peak# | Ret. Time | Area     | Height | Area %  | Height % |
|-------|-----------|----------|--------|---------|----------|
| 1     | 48.177    | 9971147  | 54041  | 14.161  | 18.126   |
| 2     | 75.893    | 9693050  | 66025  | 13.766  | 22.145   |
| 3     | 77.252    | 25659588 | 99375  | 36.443  | 33.331   |
| 4     | 93.401    | 25087125 | 78706  | 35.630  | 26.398   |
| Total |           | 70410910 | 298147 | 100.000 | 100.000  |

#### Chiral product

<Chromatogram>

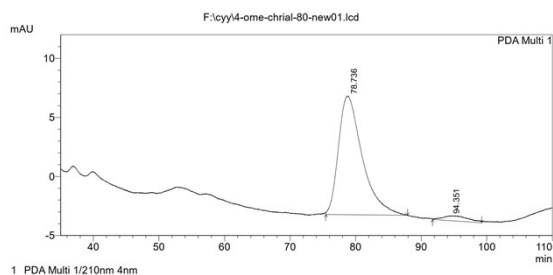

| Peak# | Ret. Time | Area    | Height | Area %  | Height % |
|-------|-----------|---------|--------|---------|----------|
| 1     | 78.736    | 2534771 | 10062  | 95.650  | 95.980   |
| 2     | 94.351    | 115268  | 421    | 4.350   | 4.020    |
| Total |           | 2650039 | 10483  | 100.000 | 100.000  |

### HPLC Chromatogram of compound 3ad.

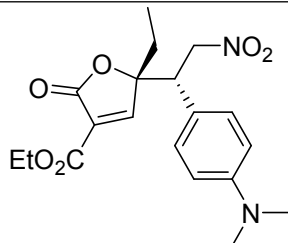

#### Racemic mixture

<Chromatogram>

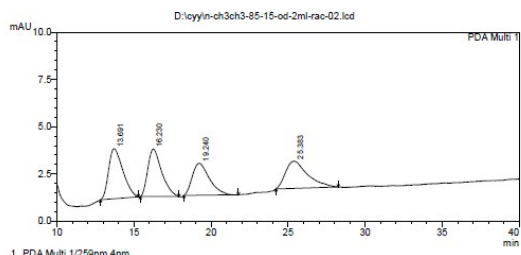

| Peak# | Ret. Time | Height | Area   | Area %  |
|-------|-----------|--------|--------|---------|
| 1     | 13.691    | 3547   | 171140 | 32.350  |
| 2     | 16.220    | 3519   | 157837 | 26.146  |
| 3     | 19.240    | 1700   | 130598 | 21.894  |
| 4     | 23.383    | 1483   | 144565 | 28.370  |
| Total |           | 8315   | 603702 | 100.000 |

#### Chiral product

<Chromatogram>

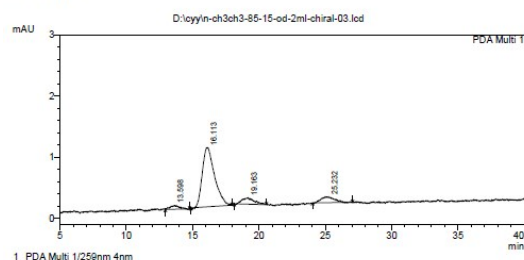

| Peak# | Ret. Time | Height | Area  | Area %  |
|-------|-----------|--------|-------|---------|
| 1     | 13.698    | 64     | 2968  | 3.760   |
| 2     | 16.113    | 958    | 62180 | 79.572  |
| 3     | 19.183    | 105    | 6445  | 8.348   |
| 4     | 23.322    | 101    | 6714  | 8.383   |
| Total |           | 1281   | 78151 | 100.000 |

### HPLC Chromatogram of compound **3ac**.

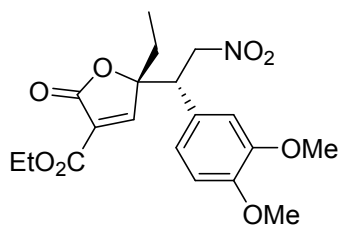

#### Racemic mixture

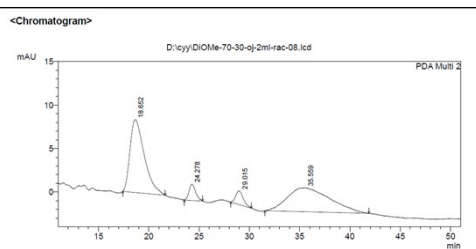

1 PDA Multi 2/210nm 4nm

| PeakTable |           |        |          |         |         |
|-----------|-----------|--------|----------|---------|---------|
| Peak#     | Ret. Time | Height | Height % | Area    | Area %  |
| 1         | 18.652    | 8386   | 57.290   | 831147  | 45.838  |
| 2         | 24.278    | 1899   | 12.973   | 86724   | 4.783   |
| 3         | 29.015    | 1589   | 10.855   | 83020   | 4.579   |
| 4         | 35.550    | 2764   | 18.882   | 812355  | 44.801  |
| Total     |           | 14637  | 100.000  | 1813246 | 100.000 |

#### Chiral product

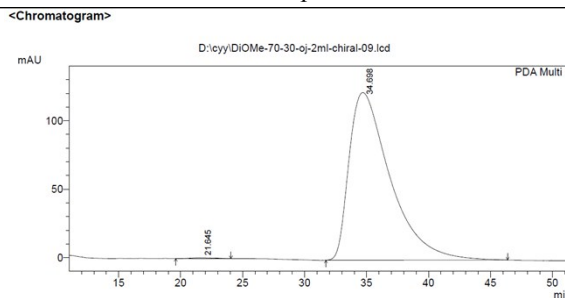

1 PDA Multi 1/210nm 4nm

| PeakTable |           |        |          |          |         |
|-----------|-----------|--------|----------|----------|---------|
| Peak#     | Ret. Time | Height | Height % | Area     | Area %  |
| 1         | 21.645    | 723    | 0.586    | 92164    | 0.324   |
| 2         | 34.698    | 122507 | 99.414   | 28312324 | 99.676  |
| Total     |           | 123230 | 100.000  | 28404488 | 100.000 |

### HPLC Chromatogram of compound **3af**.

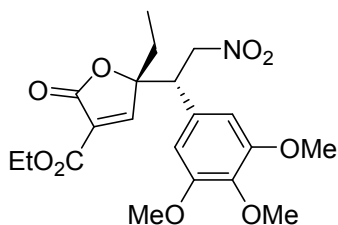

#### Racemic mixture

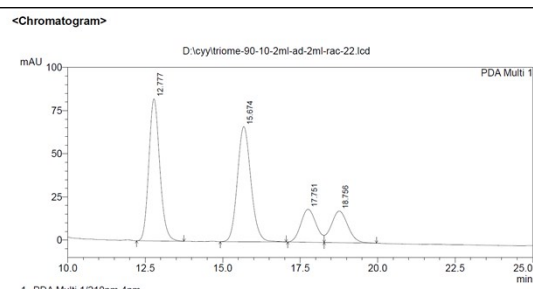

1 PDA Multi 1/210nm 4nm

| PeakTable |           |         |        |         |          |
|-----------|-----------|---------|--------|---------|----------|
| Peak#     | Ret. Time | Area    | Height | Area %  | Height % |
| 1         | 12.777    | 2021573 | 82333  | 37.586  | 44.149   |
| 2         | 15.674    | 2025290 | 66710  | 37.655  | 35.772   |
| 3         | 17.751    | 652137  | 19126  | 12.125  | 10.256   |
| 4         | 18.756    | 679523  | 18320  | 12.634  | 9.824    |
| Total     |           | 5378524 | 186489 | 100.000 | 100.000  |

#### Chiral product

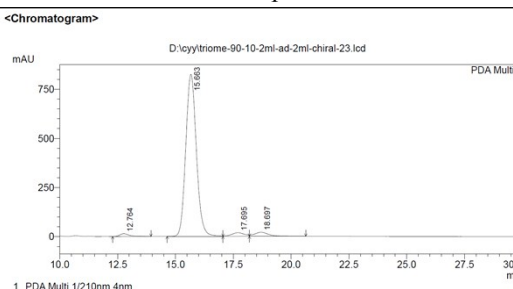

1 PDA Multi 1/210nm 4nm

| PeakTable |           |          |        |         |          |
|-----------|-----------|----------|--------|---------|----------|
| Peak#     | Ret. Time | Area     | Height | Area %  | Height % |
| 1         | 12.764    | 413969   | 14444  | 1.465   | 1.644    |
| 2         | 15.663    | 26270312 | 825083 | 92.966  | 93.935   |
| 3         | 17.695    | 705226   | 18312  | 2.496   | 2.085    |
| 4         | 18.697    | 868390   | 20518  | 3.073   | 2.336    |
| Total     |           | 28257896 | 878356 | 100.000 | 100.000  |

HPLC Chromatogram of compound **3ag**.

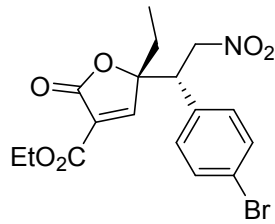

Racemic mixture

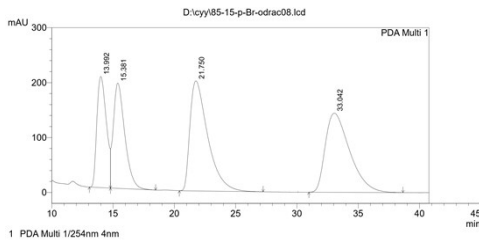

| Peak# | Ret. Time | Area     | Height | Area %  | Height % |
|-------|-----------|----------|--------|---------|----------|
| 1     | 13.992    | 10892646 | 202312 | 17.104  | 27.392   |
| 2     | 15.381    | 12517595 | 191749 | 19.655  | 25.962   |
| 3     | 21.750    | 20287894 | 200399 | 31.856  | 27.133   |
| 4     | 33.042    | 19987323 | 144112 | 31.384  | 19.512   |
| Total |           | 63685459 | 738573 | 100.000 | 100.000  |

Chiral product

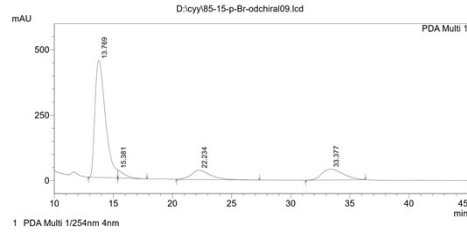

| Peak# | Ret. Time | Area     | Height | Area %  | Height % |
|-------|-----------|----------|--------|---------|----------|
| 1     | 13.769    | 27462001 | 446982 | 72.440  | 80.571   |
| 2     | 15.381    | 1147259  | 29932  | 3.026   | 5.395    |
| 3     | 22.234    | 4022017  | 35978  | 10.609  | 6.485    |
| 4     | 33.377    | 5278668  | 41876  | 13.924  | 7.548    |
| Total |           | 37909946 | 554767 | 100.000 | 100.000  |

HPLC Chromatogram of compound **3ah**.

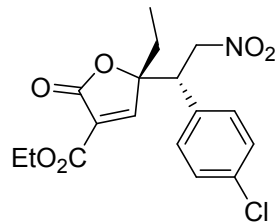

Racemic mixture

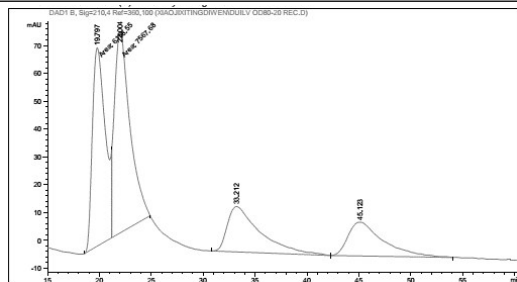

| Peak #   | RetTime [min] | Type | Width [min] | Area [mAU*s] | Height [mAU] | Area %  |
|----------|---------------|------|-------------|--------------|--------------|---------|
| 1        | 19.797        | MF   | 1.4381      | 6158.54834   | 71.37608     | 30.5933 |
| 2        | 22.004        | FM   | 1.7476      | 7567.68115   | 72.17051     | 37.5934 |
| 3        | 33.212        | BB   | 3.0560      | 3561.46216   | 16.28172     | 17.6920 |
| 4        | 45.123        | BB   | 3.4003      | 2842.66895   | 12.15551     | 14.1213 |
| Totals : |               |      |             | 2.01304e4    | 171.98383    |         |

Chiral product

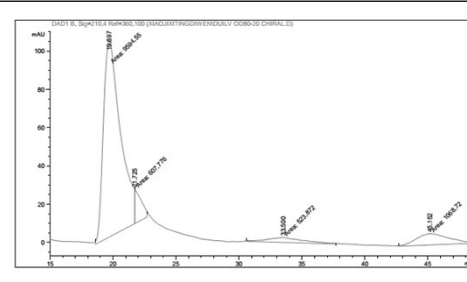

| Peak #   | RetTime [min] | Type | Width [min] | Area [mAU*s] | Height [mAU] | Area %  |
|----------|---------------|------|-------------|--------------|--------------|---------|
| 1        | 19.697        | MF   | 1.5636      | 9594.54883   | 102.26734    | 81.3448 |
| 2        | 21.725        | FM   | 0.5634      | 607.77557    | 17.97822     | 5.1529  |
| 3        | 33.500        | MM   | 3.4467      | 523.87164    | 2.53319      | 4.4415  |
| 4        | 45.152        | MM   | 3.0457      | 1068.72437   | 5.84825      | 9.0609  |
| Totals : |               |      |             | 1.17949e4    | 128.62700    |         |

### HPLC Chromatogram of compound 3ai.

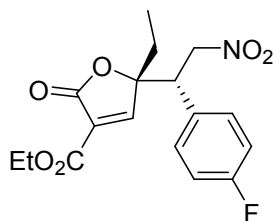

#### Racemic mixture

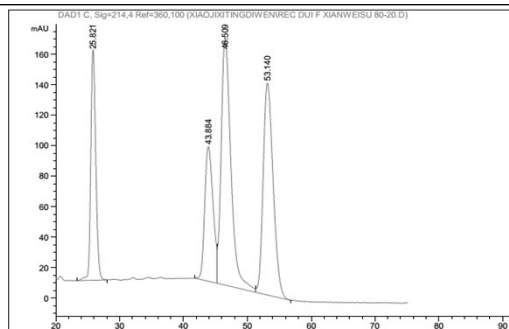

| Peak # | RetTime [min] | Type | Width [min] | Area [mAU*s] | Height [mAU] | Area %  |
|--------|---------------|------|-------------|--------------|--------------|---------|
| 1      | 25.821        | BB   | 0.8300      | 8124.75635   | 151.42014    | 16.7744 |
| 2      | 43.884        | BV   | 1.4133      | 8021.56494   | 88.50935     | 16.5613 |
| 3      | 46.509        | VV   | 1.5892      | 1.71977e4    | 162.70244    | 35.5064 |
| 4      | 53.140        | VB   | 1.6823      | 1.50916e4    | 139.04182    | 31.1580 |

Totals : 4.84356e4 541.67374

#### Chiral product

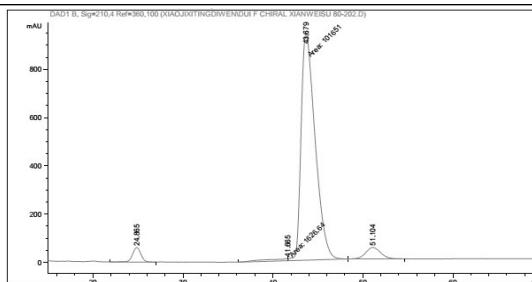

| Peak # | RetTime [min] | Type | Width [min] | Area [mAU*s] | Height [mAU] | Area %  |
|--------|---------------|------|-------------|--------------|--------------|---------|
| 1      | 24.865        | BV   | 1.0153      | 3966.48877   | 60.30684     | 3.5193  |
| 2      | 41.665        | MF   | 3.0869      | 1626.64148   | 8.78236      | 1.4433  |
| 3      | 43.679        | FM   | 1.8051      | 1.01651e5    | 938.57629    | 90.1917 |
| 4      | 51.104        | BB   | 1.7986      | 5461.31543   | 46.89914     | 4.8457  |

Totals : 1.12705e5 1054.56463

### HPLC Chromatogram of compound 3aj.

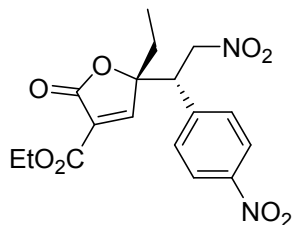

#### Racemic mixture

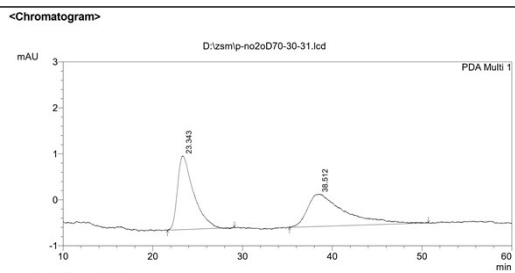

1 PDA Multi 1/254nm 4nm

PeakTable

| Peak# | Ret. Time | Area   | Height | Area %  | Height % |
|-------|-----------|--------|--------|---------|----------|
| 1     | 23.343    | 199346 | 1607   | 49.514  | 69.506   |
| 2     | 38.512    | 203262 | 705    | 50.486  | 30.494   |
| Total |           | 402608 | 2312   | 100.000 | 100.000  |

#### Chiral product

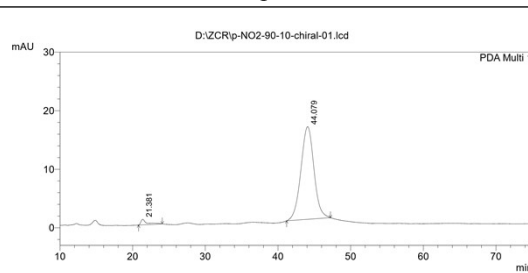

1 PDA Multi 1/254nm 4nm

PeakTable

| Peak# | Ret. Time | Area    | Height | Area %  | Height % |
|-------|-----------|---------|--------|---------|----------|
| 1     | 21.381    | 57748   | 945    | 2.840   | 5.641    |
| 2     | 44.079    | 1975709 | 15815  | 97.160  | 94.359   |
| Total |           | 2033457 | 16760  | 100.000 | 100.000  |

### HPLC Chromatogram of compound 3ak.

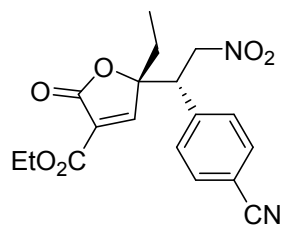

#### Racemic mixture

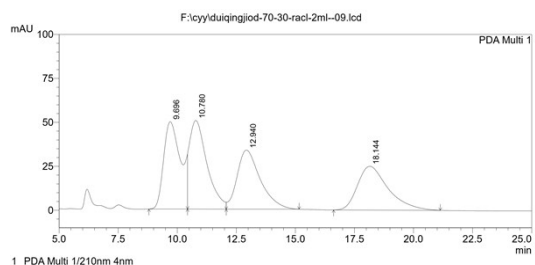

| PeakTable    |           |                |               |                |                |
|--------------|-----------|----------------|---------------|----------------|----------------|
| Peak#        | Ret. Time | Area           | Height        | Area %         | Height %       |
| 1            | 9.696     | 2482612        | 49691         | 25.790         | 31.325         |
| 2            | 10.780    | 2591066        | 50425         | 26.917         | 31.788         |
| 3            | 12.940    | 2301833        | 33603         | 23.912         | 21.183         |
| 4            | 18.144    | 2250581        | 24911         | 23.380         | 15.704         |
| <b>Total</b> |           | <b>9626092</b> | <b>158630</b> | <b>100.000</b> | <b>100.000</b> |

#### Chiral product

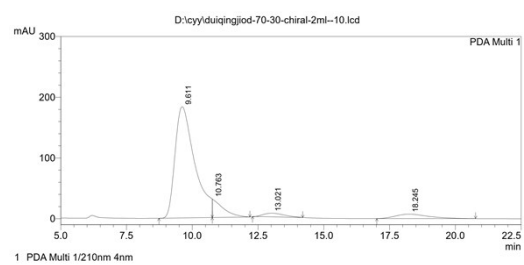

| PeakTable    |           |                 |               |                |                |
|--------------|-----------|-----------------|---------------|----------------|----------------|
| Peak#        | Ret. Time | Area            | Height        | Area %         | Height %       |
| 1            | 9.611     | 9519782         | 183261        | 83.914         | 80.702         |
| 2            | 10.763    | 848998          | 30449         | 7.484          | 13.408         |
| 3            | 13.021    | 328686          | 6060          | 2.897          | 2.668          |
| 4            | 18.245    | 647239          | 7316          | 5.705          | 3.222          |
| <b>Total</b> |           | <b>11344705</b> | <b>227085</b> | <b>100.000</b> | <b>100.000</b> |

### HPLC Chromatogram of compound 3al.

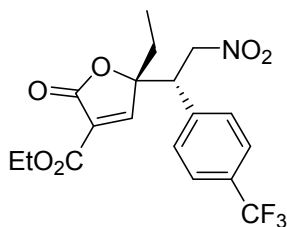

#### Racemic mixture

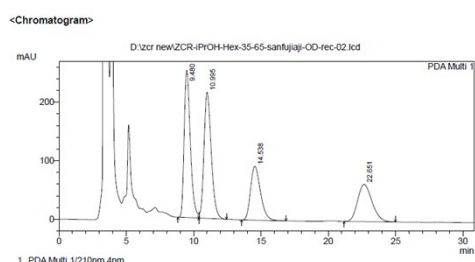

| PeakTable    |           |               |                |                 |                |
|--------------|-----------|---------------|----------------|-----------------|----------------|
| Peak#        | Ret. Time | Height        | Height %       | Area            | Area %         |
| 1            | 9.480     | 251768        | 40.398         | 7999637         | 31.252         |
| 2            | 10.995    | 215806        | 34.638         | 8113271         | 31.696         |
| 3            | 14.538    | 92043         | 14.769         | 4742900         | 18.520         |
| 4            | 22.651    | 63597         | 10.205         | 4741298         | 18.523         |
| <b>Total</b> |           | <b>623213</b> | <b>100.000</b> | <b>25597106</b> | <b>100.000</b> |

#### Chiral product

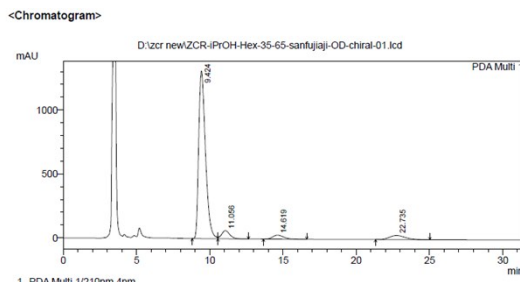

| PeakTable    |           |                |                |                 |                |
|--------------|-----------|----------------|----------------|-----------------|----------------|
| Peak#        | Ret. Time | Height         | Height %       | Area            | Area %         |
| 1            | 9.424     | 1310396        | 91.175         | 42030523        | 86.688         |
| 2            | 11.056    | 63562          | 4.423          | 2447332         | 5.048          |
| 3            | 14.619    | 31190          | 2.170          | 1608512         | 3.318          |
| 4            | 22.735    | 32087          | 2.233          | 2398323         | 4.947          |
| <b>Total</b> |           | <b>1437235</b> | <b>100.000</b> | <b>48484690</b> | <b>100.000</b> |

### HPLC Chromatogram of compound **3am**.

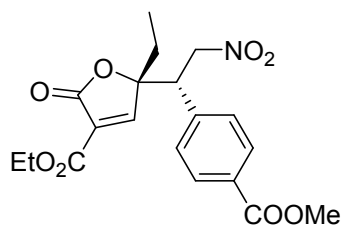

#### Racemic mixture

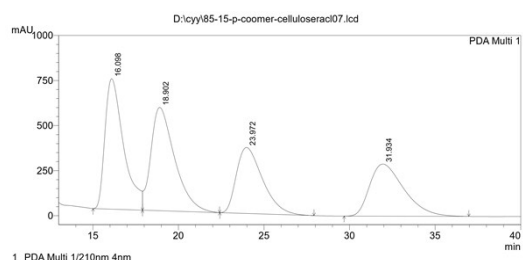

| PeakTable |           |           |         |         |          |
|-----------|-----------|-----------|---------|---------|----------|
| Peak#     | Ret. Time | Area      | Height  | Area %  | Height % |
| 1         | 16.098    | 54746813  | 723621  | 28.897  | 37.072   |
| 2         | 18.902    | 55338636  | 572907  | 29.210  | 29.351   |
| 3         | 23.972    | 39053148  | 366046  | 20.614  | 18.753   |
| 4         | 31.934    | 40314996  | 289356  | 21.280  | 14.824   |
| Total     |           | 189453593 | 1951930 | 100.000 | 100.000  |

#### Chiral product

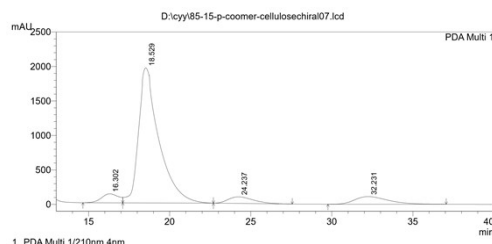

| PeakTable |           |           |         |         |          |
|-----------|-----------|-----------|---------|---------|----------|
| Peak#     | Ret. Time | Area      | Height  | Area %  | Height % |
| 1         | 16.302    | 9625232   | 130123  | 4.658   | 5.671    |
| 2         | 18.529    | 171078073 | 1958635 | 82.798  | 85.361   |
| 3         | 24.237    | 10265756  | 95305   | 4.968   | 4.154    |
| 4         | 32.231    | 15652594  | 110456  | 7.575   | 4.814    |
| Total     |           | 206621655 | 2294519 | 100.000 | 100.000  |

### HPLC Chromatogram of compound **3an**.

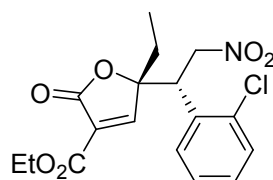

#### Racemic mixture

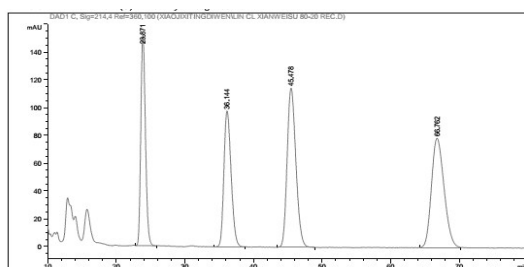

| Peak #   | RetTime [min] | Type | Width [min] | Area [mAU*s] | Height [mAU] | Area %  |
|----------|---------------|------|-------------|--------------|--------------|---------|
| 1        | 23.871        | BB   | 0.7312      | 7117.37256   | 151.74356    | 20.6623 |
| 2        | 36.144        | BB   | 1.1343      | 7166.87207   | 97.87418     | 20.8060 |
| 3        | 45.478        | BB   | 1.3884      | 1.01502e4    | 114.69798    | 29.4669 |
| 4        | 66.762        | BB   | 1.9483      | 1.00116e4    | 78.69189     | 29.0647 |
| Totals : |               |      |             | 3.44461e4    | 443.00762    |         |

#### Chiral product

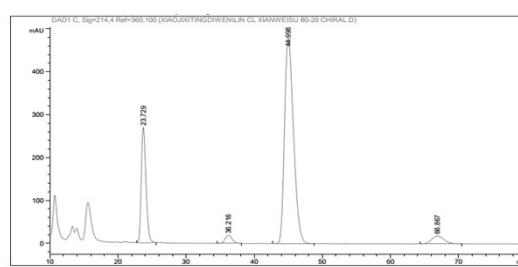

| Peak #   | RetTime [min] | Type | Width [min] | Area [mAU*s] | Height [mAU] | Area %  |
|----------|---------------|------|-------------|--------------|--------------|---------|
| 1        | 23.729        | BB   | 0.7397      | 1.28250e4    | 269.27048    | 21.2625 |
| 2        | 36.216        | BB   | 1.0977      | 1342.00146   | 18.60114     | 2.2249  |
| 3        | 44.998        | BB   | 1.4167      | 4.38670e4    | 480.68463    | 72.7269 |
| 4        | 66.867        | BB   | 1.8973      | 2283.44116   | 18.28034     | 3.7857  |
| Totals : |               |      |             | 6.03175e4    | 786.83658    |         |



### HPLC Chromatogram of compound **3ao**.

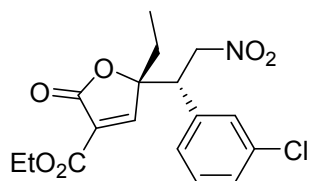

#### Racemic mixture

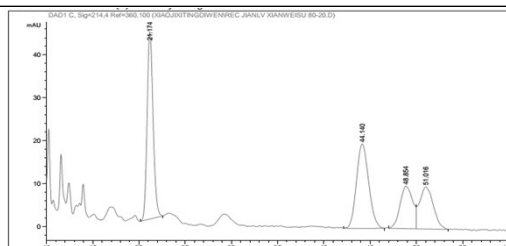

| Peak # | RetTime [min] | Type | Width [min] | Area [mAU*s] | Height [mAU] | Area %  |
|--------|---------------|------|-------------|--------------|--------------|---------|
| 1      | 21.174        | BB   | 0.6903      | 1951.04834   | 43.57805     | 34.0742 |
| 2      | 44.140        | BB   | 1.4053      | 1809.18115   | 19.66584     | 31.5966 |
| 3      | 48.854        | BV   | 1.2420      | 946.57367    | 9.91320      | 16.5315 |
| 4      | 51.016        | VB   | 1.3897      | 1019.07312   | 9.79608      | 17.7977 |

Totals : 5725.87628 82.95316

#### Chiral product

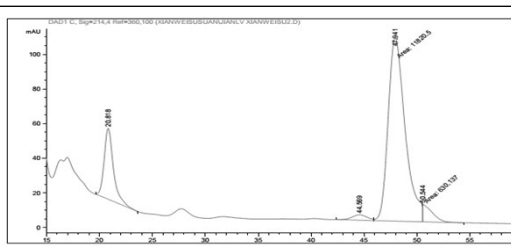

| Peak # | RetTime [min] | Type | Width [min] | Area [mAU*s] | Height [mAU] | Area %  |
|--------|---------------|------|-------------|--------------|--------------|---------|
| 1      | 20.818        | BB   | 0.9120      | 2495.36987   | 40.89043     | 16.3566 |
| 2      | 44.569        | BV   | 1.3154      | 310.05273    | 3.06692      | 2.0323  |
| 3      | 47.941        | MF   | 1.8630      | 1.18205e4    | 105.75022    | 77.4807 |
| 4      | 50.544        | FM   | 1.0325      | 630.13696    | 10.17188     | 4.1304  |

Totals : 1.52560e4 159.87945

### HPLC Chromatogram of compound **3ap**.

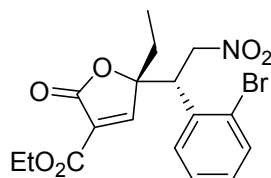

#### Racemic mixture

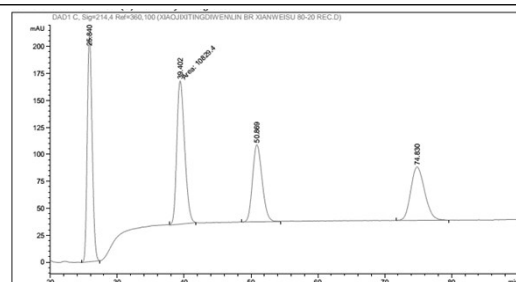

| Peak # | RetTime [min] | Type | Width [min] | Area [mAU*s] | Height [mAU] | Area %  |
|--------|---------------|------|-------------|--------------|--------------|---------|
| 1      | 25.840        | BB   | 0.7955      | 1.06789e4    | 209.19695    | 29.8559 |
| 2      | 39.402        | MM   | 1.3584      | 1.08294e4    | 132.86803    | 30.2769 |
| 3      | 50.869        | BB   | 1.5288      | 7113.67676   | 71.49628     | 19.8884 |
| 4      | 74.830        | BB   | 2.1364      | 7145.96826   | 49.61184     | 19.9787 |

Totals : 3.57679e4 463.17309

#### Chiral product

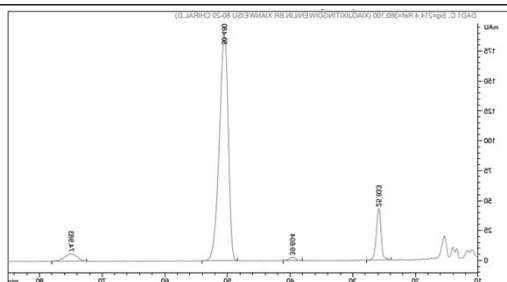

| Peak # | RetTime [min] | Type | Width [min] | Area [mAU*s] | Height [mAU] | Area %  |
|--------|---------------|------|-------------|--------------|--------------|---------|
| 1      | 25.833        | BB   | 0.8190      | 2286.86597   | 43.09853     | 10.2806 |
| 2      | 39.604        | BB   | 1.0009      | 223.64978    | 2.98920      | 1.0054  |
| 3      | 50.480        | BB   | 1.5733      | 1.88881e4    | 189.10185    | 84.9115 |
| 4      | 74.983        | BB   | 1.6689      | 845.84320    | 6.07314      | 3.8025  |

Totals : 2.22445e4 241.26272

### HPLC Chromatogram of compound **3aq**.

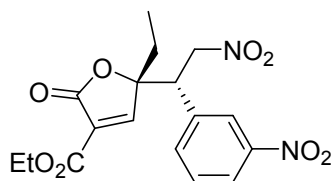

#### Racemic mixture

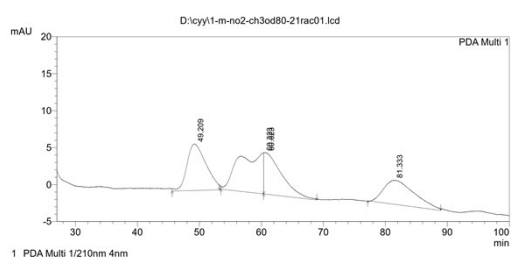

| Peak Table |           |         |        |         |          |
|------------|-----------|---------|--------|---------|----------|
| Peak#      | Ret. Time | Area    | Height | Area %  | Height % |
| 1          | 49.209    | 1349371 | 6306   | 26.508  | 30.321   |
| 2          | 60.623    | 1478843 | 5592   | 29.052  | 26.889   |
| 3          | 81.333    | 1127181 | 5641   | 22.143  | 27.123   |
| 4          | 82.746    | 1135084 | 3258   | 22.297  | 15.667   |
| Total      |           | 5090359 | 20797  | 100.000 | 100.000  |

#### Chiral product

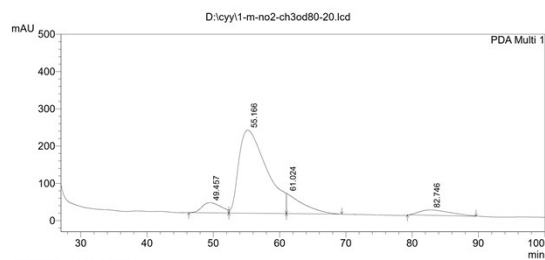

| Peak Table |           |          |        |         |          |
|------------|-----------|----------|--------|---------|----------|
| Peak#      | Ret. Time | Area     | Height | Area %  | Height % |
| 1          | 49.457    | 5347004  | 27198  | 6.328   | 8.526    |
| 2          | 55.166    | 65097615 | 222781 | 77.640  | 69.839   |
| 3          | 61.024    | 9232281  | 54484  | 10.926  | 17.080   |
| 4          | 82.746    | 4821146  | 14532  | 5.706   | 4.555    |
| Total      |           | 84498047 | 318994 | 100.000 | 100.000  |

### HPLC Chromatogram of compound **3ar**.

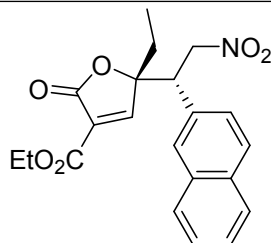

#### Racemic mixture

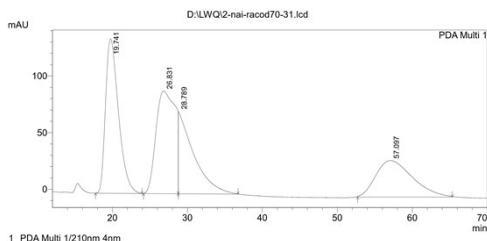

| Peak Table |           |          |        |         |          |
|------------|-----------|----------|--------|---------|----------|
| Peak#      | Ret. Time | Area     | Height | Area %  | Height % |
| 1          | 19.741    | 16400574 | 136279 | 30.429  | 41.037   |
| 2          | 26.831    | 16141935 | 90702  | 29.949  | 27.313   |
| 3          | 28.789    | 10333401 | 72834  | 19.172  | 21.932   |
| 4          | 57.097    | 11022093 | 32272  | 20.450  | 9.718    |
| Total      |           | 53898002 | 332087 | 100.000 | 100.000  |

#### Chiral product

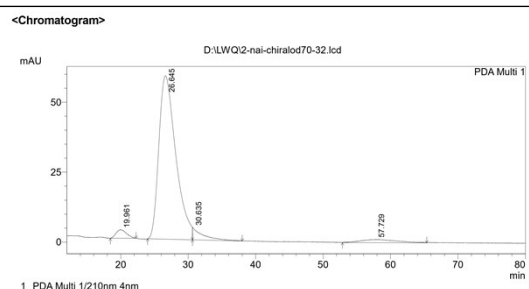

| Peak Table |           |          |        |         |          |
|------------|-----------|----------|--------|---------|----------|
| Peak#      | Ret. Time | Area     | Height | Area %  | Height % |
| 1          | 19.961    | 330810   | 3059   | 2.900   | 4.567    |
| 2          | 26.645    | 10183392 | 58353  | 89.283  | 87.120   |
| 3          | 30.635    | 459000   | 4432   | 4.024   | 6.616    |
| 4          | 57.729    | 432498   | 1136   | 3.792   | 1.696    |
| Total      |           | 11405700 | 66980  | 100.000 | 100.000  |

### HPLC Chromatogram of compound 3as.

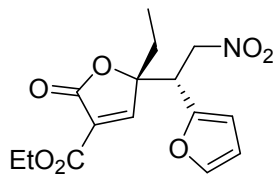

#### Racemic mixture

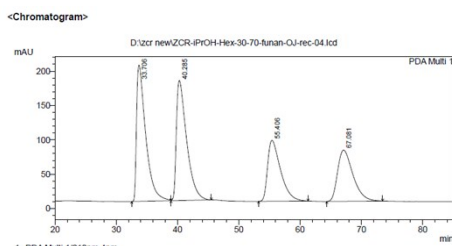

| PeakTable |           |        |          |          |         |
|-----------|-----------|--------|----------|----------|---------|
| Peak#     | Ret. Time | Height | Height % | Area     | Area %  |
| 1         | 33.706    | 199290 | 56.987   | 20629230 | 30.782  |
| 2         | 40.285    | 174660 | 32.580   | 20309644 | 30.305  |
| 3         | 55.406    | 88693  | 16.544   | 13066718 | 19.498  |
| 4         | 67.081    | 74457  | 13.889   | 13010893 | 19.414  |
| Total     |           | 536100 | 100.000  | 67016485 | 100.000 |

#### Chiral product

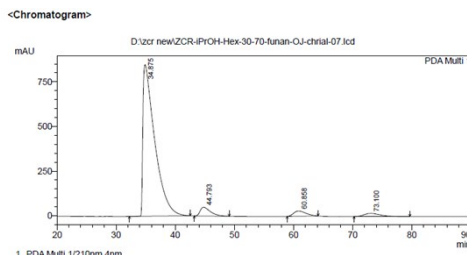

| PeakTable |           |        |          |           |         |
|-----------|-----------|--------|----------|-----------|---------|
| Peak#     | Ret. Time | Height | Height % | Area      | Area %  |
| 1         | 34.875    | 847461 | 89.839   | 117968996 | 89.783  |
| 2         | 44.793    | 49054  | 5.200    | 5896596   | 4.488   |
| 3         | 60.858    | 29054  | 3.080    | 4204786   | 3.200   |
| 4         | 73.100    | 17747  | 1.881    | 3333286   | 2.529   |
| Total     |           | 943317 | 100.000  | 131393664 | 100.000 |

### HPLC Chromatogram of compound 3at.

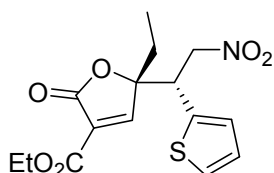

#### Racemic mixture

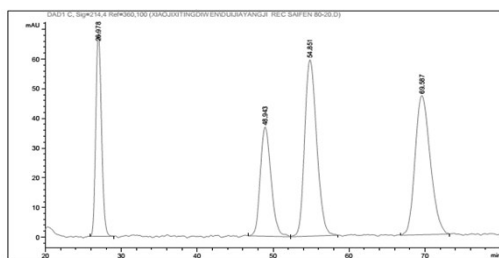

| Peak # | RetTime [min] | Type | Width [min] | Area [mAU*s] | Height [mAU] | Area %  |
|--------|---------------|------|-------------|--------------|--------------|---------|
| 1      | 26.978        | BB   | 0.8017      | 3571.58740   | 68.79678     | 17.6214 |
| 2      | 48.943        | BB   | 1.5211      | 3635.08325   | 36.77727     | 17.9347 |
| 3      | 54.851        | BB   | 1.6938      | 6564.95215   | 59.38007     | 32.3899 |
| 4      | 69.587        | BB   | 2.1057      | 6496.86670   | 46.85364     | 32.0540 |

Totals : 2.02685e4 211.80776

#### Chiral product

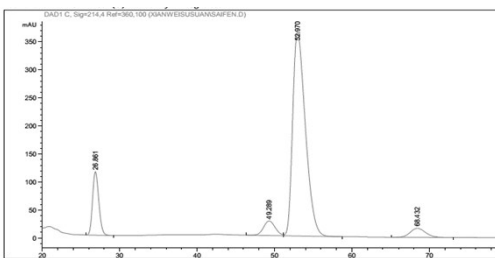

| Peak # | RetTime [min] | Type | Width [min] | Area [mAU*s] | Height [mAU] | Area %  |
|--------|---------------|------|-------------|--------------|--------------|---------|
| 1      | 26.861        | BB   | 0.8734      | 6349.53662   | 113.36591    | 11.9891 |
| 2      | 49.289        | BV   | 1.6152      | 2745.04565   | 26.18110     | 5.1831  |
| 3      | 52.970        | VB   | 1.7562      | 4.16301e4    | 364.56894    | 78.6052 |
| 4      | 68.432        | BB   | 1.9916      | 2236.30420   | 16.22889     | 4.2226  |

Totals : 5.29610e4 520.34484

### HPLC Chromatogram of compound **3au**.

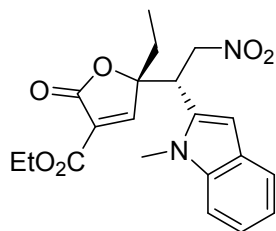

#### Racemic mixture

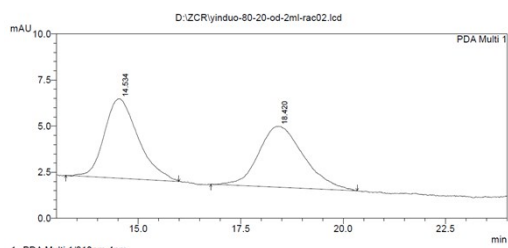

| PeakTable |           |        |        |         |          |
|-----------|-----------|--------|--------|---------|----------|
| Peak#     | Ret. Time | Area   | Height | Area %  | Height % |
| 1         | 14.534    | 248252 | 4314   | 49.504  | 56.648   |
| 2         | 18.420    | 253224 | 3362   | 50.496  | 43.352   |
| Total     |           | 501479 | 7616   | 100.000 | 100.000  |

#### Chiral product

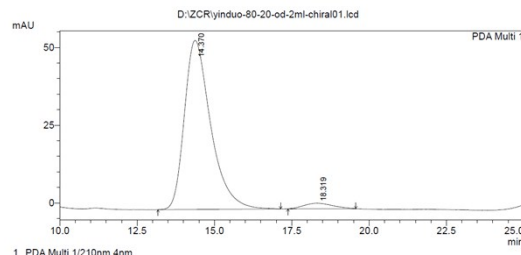

| PeakTable |           |         |        |         |          |
|-----------|-----------|---------|--------|---------|----------|
| Peak#     | Ret. Time | Area    | Height | Area %  | Height % |
| 1         | 14.376    | 3230707 | 54307  | 96.535  | 96.590   |
| 2         | 18.319    | 116295  | 1799   | 3.475   | 3.201    |
| Total     |           | 3347002 | 56196  | 100.000 | 100.000  |

### HPLC Chromatogram of compound **3av**.

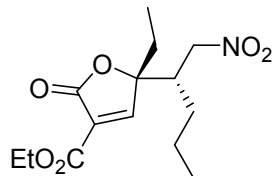

#### Racemic mixture

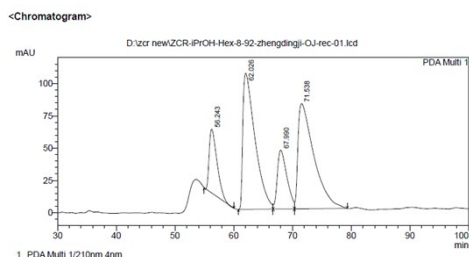

| PeakTable |           |        |          |          |         |
|-----------|-----------|--------|----------|----------|---------|
| Peak#     | Ret. Time | Height | Height % | Area     | Area %  |
| 1         | 56.243    | 49397  | 17.533   | 4594118  | 11.376  |
| 2         | 62.026    | 105330 | 37.382   | 15190830 | 37.617  |
| 3         | 67.990    | 45611  | 16.189   | 5169756  | 12.803  |
| 4         | 71.538    | 81413  | 28.896   | 15428060 | 38.205  |
| Total     |           | 281741 | 100.000  | 40382764 | 100.000 |

#### Chiral product

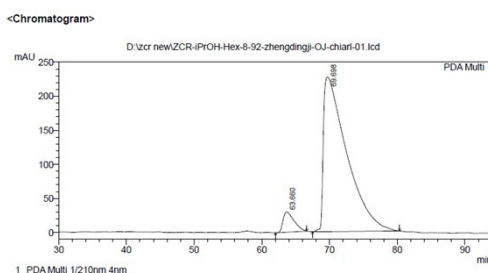

| PeakTable |           |        |          |          |         |
|-----------|-----------|--------|----------|----------|---------|
| Peak#     | Ret. Time | Height | Height % | Area     | Area %  |
| 1         | 68.660    | 29677  | 11.559   | 3345567  | 5.797   |
| 2         | 69.698    | 227065 | 88.441   | 54365414 | 94.203  |
| Total     |           | 256742 | 100.000  | 57710981 | 100.000 |

### HPLC Chromatogram of compound **3aw**.

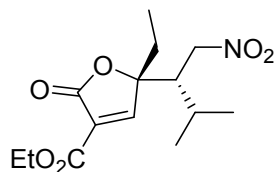

#### Racemic mixture

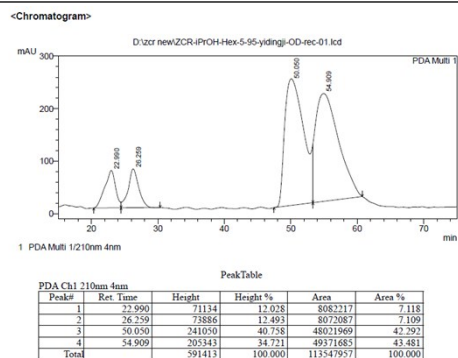

#### Chiral product

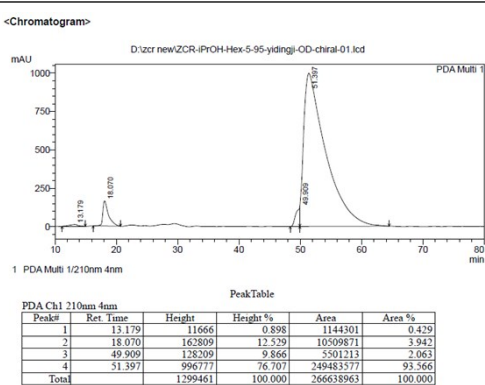

### HPLC Chromatogram of compound **3ax**.

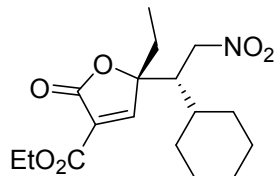

#### Racemic mixture

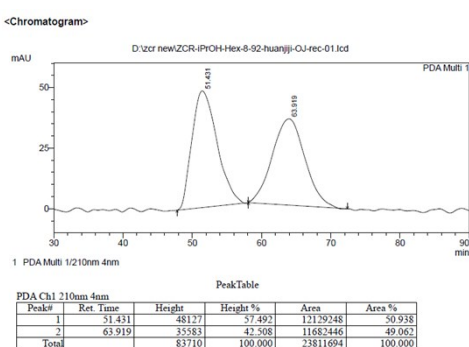

#### Chiral product

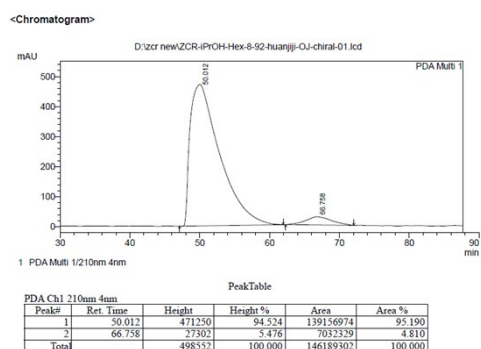

### HPLC Chromatogram of compound **3ay**.

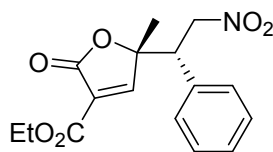

#### Racemic mixture

<Chromatogram>

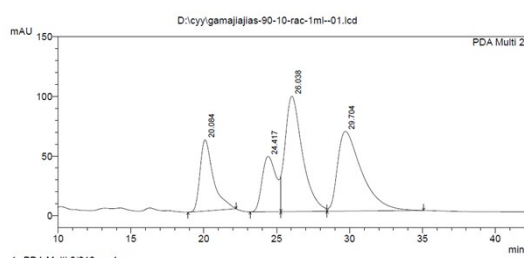

1 PDA Multi 2/210nm 4nm

PeakTable

| Peak# | Ret. Time | Height | Height % | Area     | Area %  |
|-------|-----------|--------|----------|----------|---------|
| 1     | 20.084    | 59603  | 22.097   | 3793761  | 16.719  |
| 2     | 24.417    | 46473  | 17.229   | 3190948  | 14.063  |
| 3     | 26.038    | 96788  | 35.882   | 7987984  | 35.203  |
| 4     | 29.704    | 66873  | 24.792   | 7718325  | 34.015  |
| Total |           | 269737 | 100.000  | 22691018 | 100.000 |

#### Chiral product

<Chromatogram>

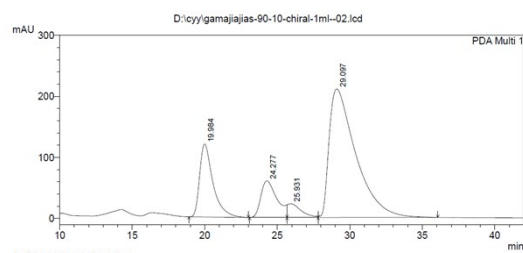

1 PDA Multi 1/210nm 4nm

PeakTable

| Peak# | Ret. Time | Height | Height % | Area     | Area %  |
|-------|-----------|--------|----------|----------|---------|
| 1     | 19.984    | 119595 | 28.985   | 7650140  | 18.860  |
| 2     | 24.277    | 60098  | 14.565   | 4613250  | 11.373  |
| 3     | 25.931    | 22461  | 5.443    | 1436642  | 3.542   |
| 4     | 29.097    | 210461 | 51.007   | 26863005 | 66.225  |
| Total |           | 412614 | 100.000  | 40563036 | 100.000 |

### HPLC Chromatogram of compound **3az**.

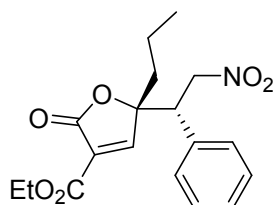

#### Racemic mixture

<Chromatogram>

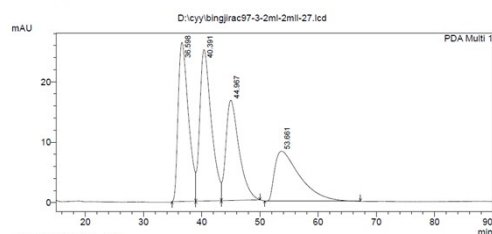

1 PDA Multi 1/254nm 4nm

PeakTable

| Peak# | Ret. Time | Height | Height % | Area     | Area %  |
|-------|-----------|--------|----------|----------|---------|
| 1     | 36.598    | 26332  | 34.549   | 3223427  | 27.472  |
| 2     | 40.391    | 25075  | 32.900   | 3469679  | 29.571  |
| 3     | 44.967    | 16593  | 21.771   | 2614052  | 22.279  |
| 4     | 53.661    | 8217   | 10.780   | 2426131  | 20.677  |
| Total |           | 76217  | 100.000  | 11733289 | 100.000 |

#### Chiral product

<Chromatogram>

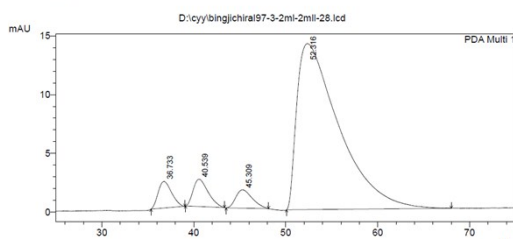

1 PDA Multi 1/254nm 4nm

PeakTable

| Peak# | Ret. Time | Height | Height % | Area    | Area %  |
|-------|-----------|--------|----------|---------|---------|
| 1     | 36.733    | 2262   | 11.151   | 229534  | 4.419   |
| 2     | 40.539    | 2324   | 11.460   | 262461  | 5.053   |
| 3     | 45.309    | 1567   | 7.729    | 194402  | 3.743   |
| 4     | 52.316    | 14128  | 69.660   | 4507338 | 86.784  |
| Total |           | 20281  | 100.000  | 5193735 | 100.000 |
